# Supplementary material for: New Chromones from Bouvardia ternifolia (Cav.) Schltdl with Anti-Inflammatory and Immunomodulatory Activity
Source: MDPI journal article supplement (doi:10.3390/plants12010001), 2022-12-20
Supplement: s1 [file s1]

# New chromones from *Bouvardia ternifolia* (Cav.) Schltdl with anti-inflammatory and immunomodulatory activity.

Yury Maritza Zapata Lopera <sup>1,2</sup>, Enrique Jiménez-Ferrer <sup>1,\*</sup>, Maribel Herrera-Ruiz <sup>1</sup>, Alejandro Zamilpa <sup>1</sup>, Manasés González-Cortazar <sup>1</sup>, Gabriela Rosas-Salgado <sup>3</sup>, Mayra Alejandra Santillán-Urquiza <sup>1</sup>, Gabriela Trejo-Tapia <sup>2</sup> and Antonio Ruperto Jiménez-Aparicio <sup>2,\*</sup>

<sup>1</sup> Centro de Investigación Biomédica del Sur, Instituto Mexicano del Seguro Social, Xochitepec 62790, Morelos, Mexico

<sup>2</sup> Instituto Politécnico Nacional, Centro de Desarrollo de Productos Bióticos, Yautepec 62730, Morelos, Mexico

<sup>3</sup> Facultad de Medicina, Universidad Autónoma del Estado de Morelos, Cuernavaca 62209, Morelos, Mexico

\* Correspondence: enriqueferrer\_mx@yahoo.com (E.J.-F.); aaparici@ipn.mx (A.R.J.-A.); Tel.: +52-7771355563 (E.J.-F.)

---

## Content

**Figure S1.** Spectrum UV of ternifoliol (1)

**Figure S2.** <sup>1</sup>H NMR (CD<sub>3</sub>OD, 400 MHz) of ternifoliol (1)

**Figure S3.** <sup>13</sup>C NMR (CD<sub>3</sub>OD, 100 MHz) of ternifoliol (1)

**Figure S4.** <sup>13</sup>C (DEPT) NMR (CD<sub>3</sub>OD, 100 MHz) of ternifoliol (1)

**Figure S5.** <sup>1</sup>H-<sup>1</sup>H COSY NMR (CD<sub>3</sub>OD, 400 MHz) of ternifoliol (1)

**Figure S6.** <sup>1</sup>H-<sup>13</sup>C (HSQC) NMR (CD<sub>3</sub>OD, 400 MHz) of ternifoliol (1)

**Figure S7.** <sup>1</sup>H-<sup>13</sup>C (HMBC) NMR (CD<sub>3</sub>OD, 400 MHz) of ternifoliol (1)

**Figure S8.** Mass spectrum (MS) of ternifoliol (1)

**Figure S9.** Spectrum UV of ternifolial (2)

**Figure S10.** <sup>1</sup>H NMR (CDCl<sub>3</sub>, 600 MHz) of ternifolial (2)

**Figure S11.** <sup>13</sup>C NMR (CDCl<sub>3</sub>, 150 MHz) of ternifolial (2)

**Figure S12.** <sup>1</sup>H-<sup>1</sup>H COSY NMR (CDCl<sub>3</sub>, 600 MHz) of ternifolial (2)

**Figure S13.** <sup>1</sup>H-<sup>1</sup>H TOCSY NMR (CDCl<sub>3</sub>, 600 MHz) of ternifolial (2)

**Figure S14.** <sup>1</sup>H-<sup>1</sup>H NOESY NMR (CDCl<sub>3</sub>, 600 MHz) of ternifolial (2)

**Figure S15.** <sup>1</sup>H-<sup>13</sup>C (HSQC) NMR (CDCl<sub>3</sub>, 600 MHz) of ternifolial (2)

**Figure S16.** <sup>1</sup>H-<sup>13</sup>C (HMBC) NMR (CDCl<sub>3</sub>, 600 MHz) of ternifolial (2)

**Figure S17.** Mass spectrum (MS) of ternifolial (2)

**Figure S18.** Spectrum UV of bouvardin (3)

**Figure S19.** <sup>1</sup>H NMR (CD<sub>3</sub>OD, 400 MHz) of bouvardin (3)

**Figure S20.** <sup>13</sup>C NMR (CD<sub>3</sub>OD, 100 MHz) of bouvardin (3)

**Figure S21.** <sup>13</sup>C (DEPT) NMR (CD<sub>3</sub>OD, 100 MHz) of bouvardin (3)

**Figure S22.** <sup>1</sup>H-<sup>1</sup>H COSY NMR (CD<sub>3</sub>OD, 400 MHz) of bouvardin (3)

**Figure S23.** <sup>1</sup>H-<sup>1</sup>H NOESY NMR (CD<sub>3</sub>OD, 400 MHz) of bouvardin (3)

---

**Figure S24.**  $^1\text{H}$ - $^{13}\text{C}$  (HMBC) NMR ( $\text{CD}_3\text{OD}$ ), 400 MHz) of bouvardin (**3**)

**Figure S25.** Mass spectrum (MS) of bouvardin (**3**)

**Figure S26.** Spectrum UV of Scopoletin (**4**)

**Figure S27.**  $^1\text{H}$  NMR ( $\text{CDCl}_3$ , 600 MHz) of scopoletin (**4**)

**Figure S28.**  $^{13}\text{C}$  NMR ( $\text{CDCl}_3$ , 150 MHz) of scopoletin (**4**)

**Figure S29.**  $^{13}\text{C}$  (DEPT) NMR ( $\text{CDCl}_3$ , 150 MHz) of scopoletin (**4**)

**Figure S30.** IF spectroscopy ternifolial

**Figure S31.** IF spectroscopy ternifolial

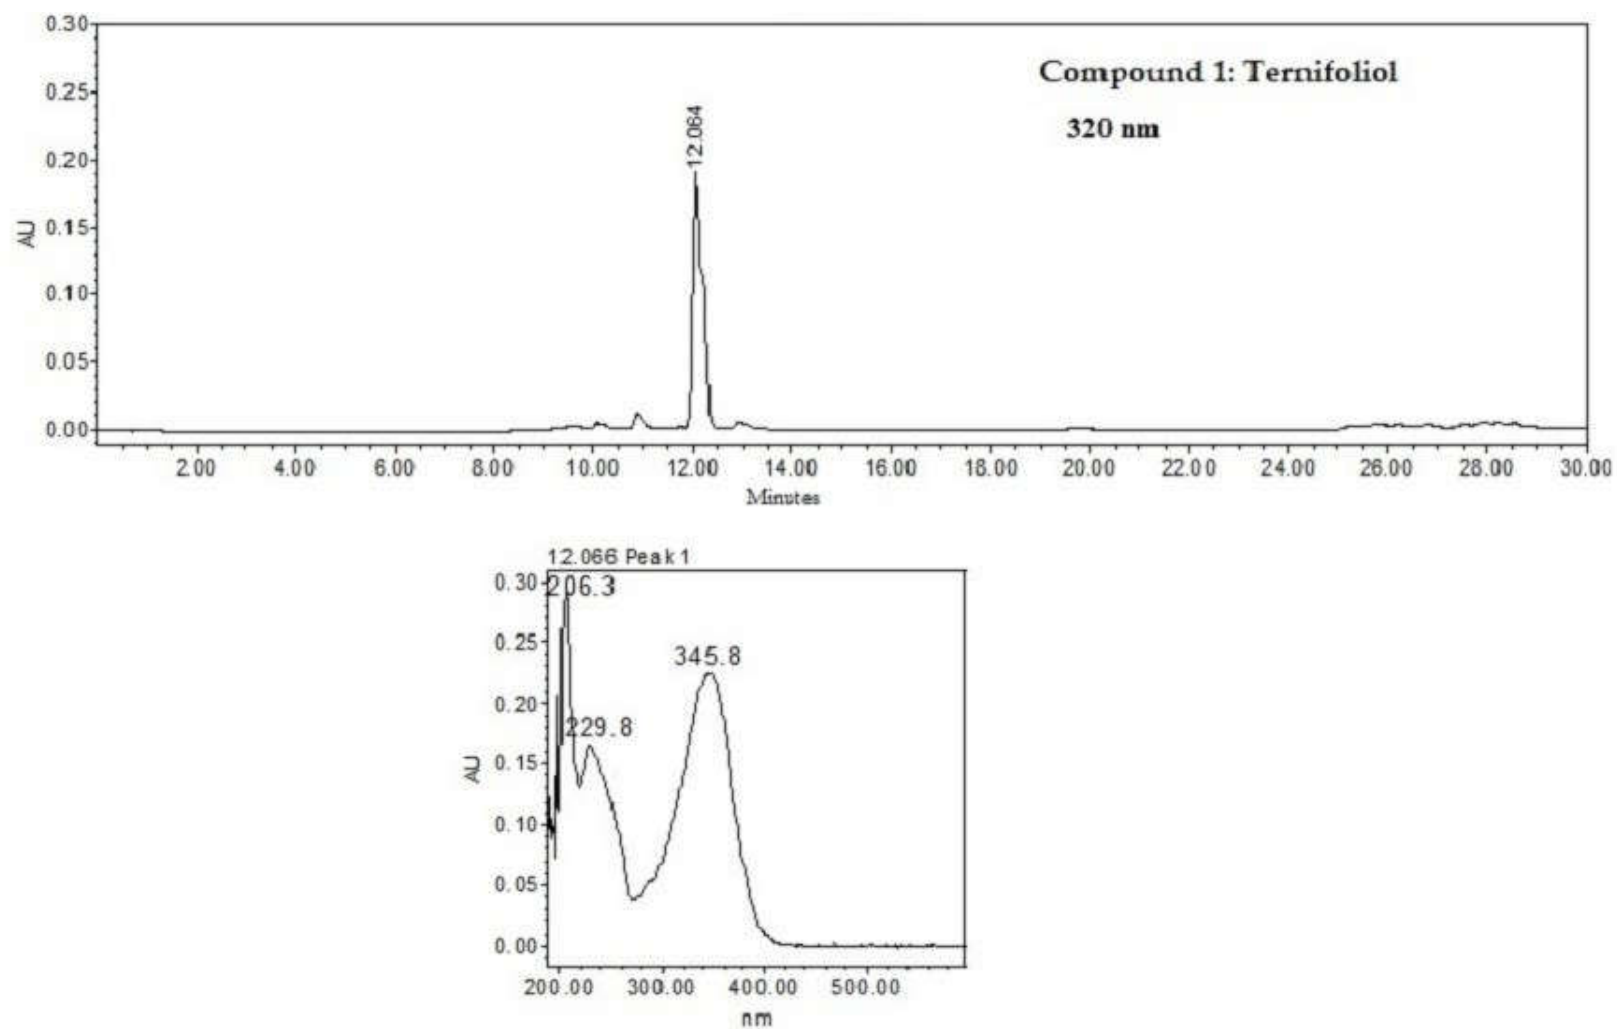

Figure S1. Spectrum UV of ternifoliol (**1**)

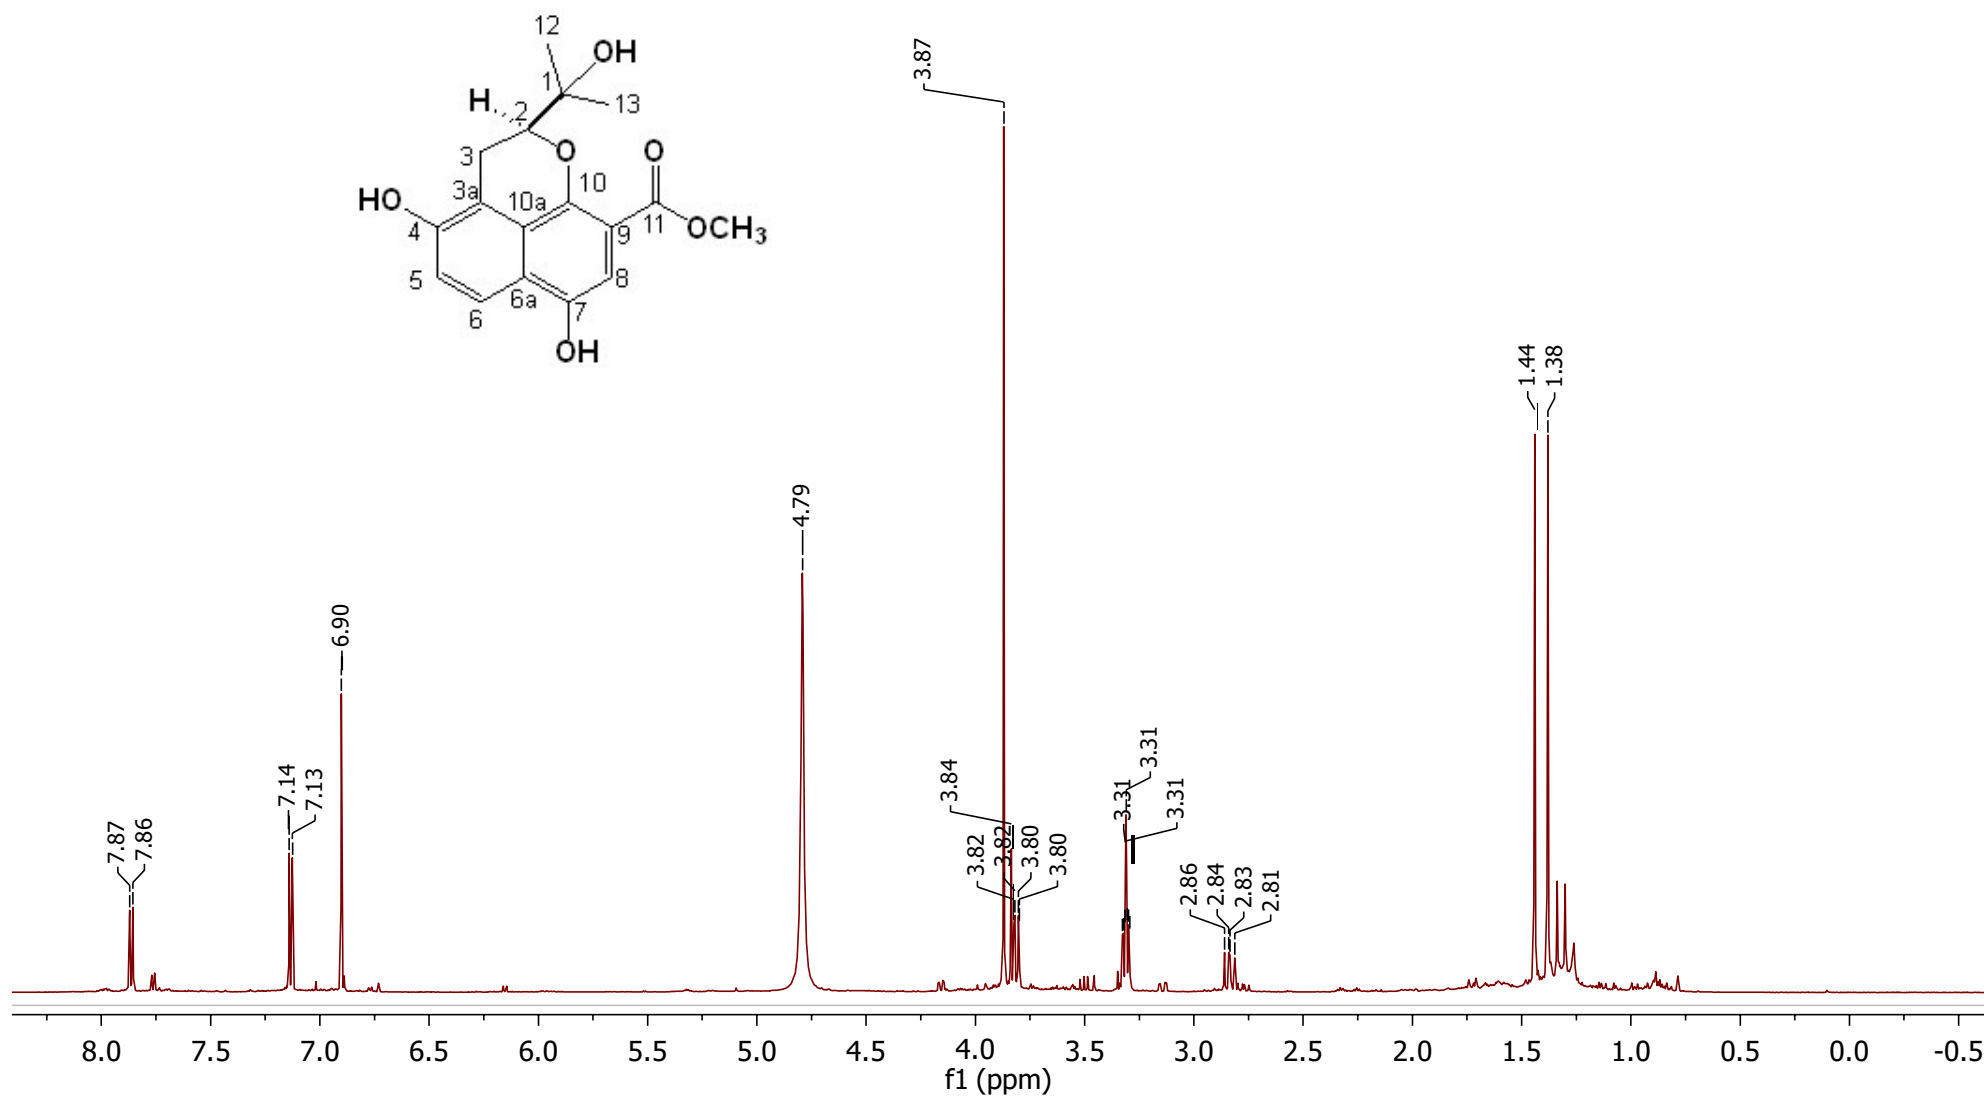

Figure S2.  $^1\text{H}$  NMR ( $\text{CDCl}_3$ , 400 MHz) of ternifoliol (**1**)

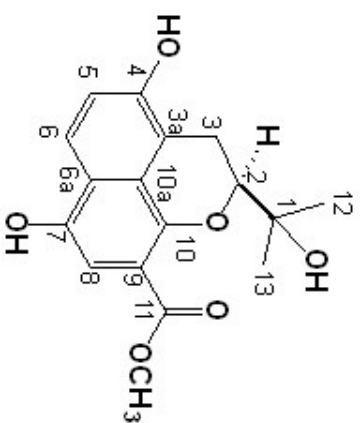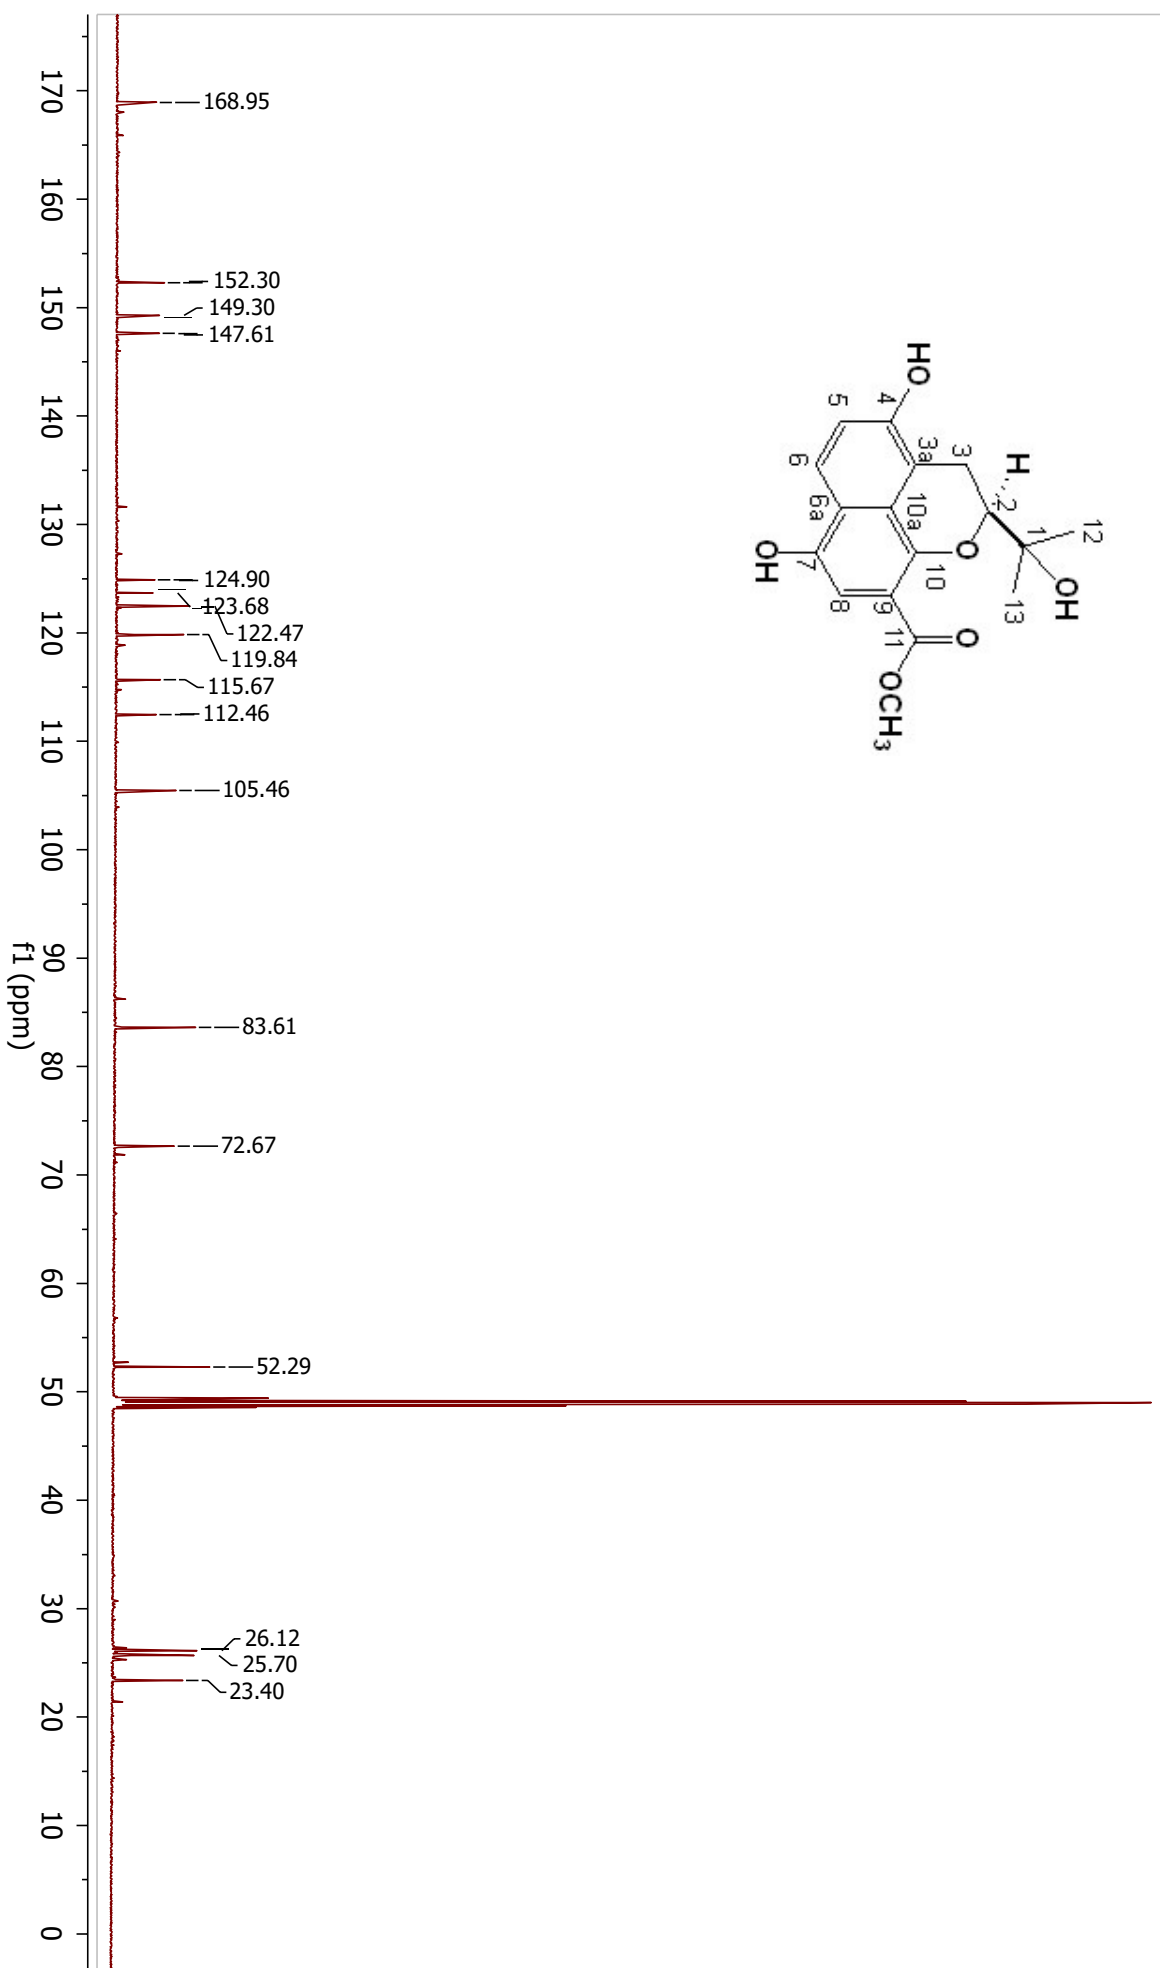

Figure S3.  $^{13}\text{C}$  NMR ( $\text{CD}_3\text{OD}$ , 125 MHz) of ternifoliol (**1**)

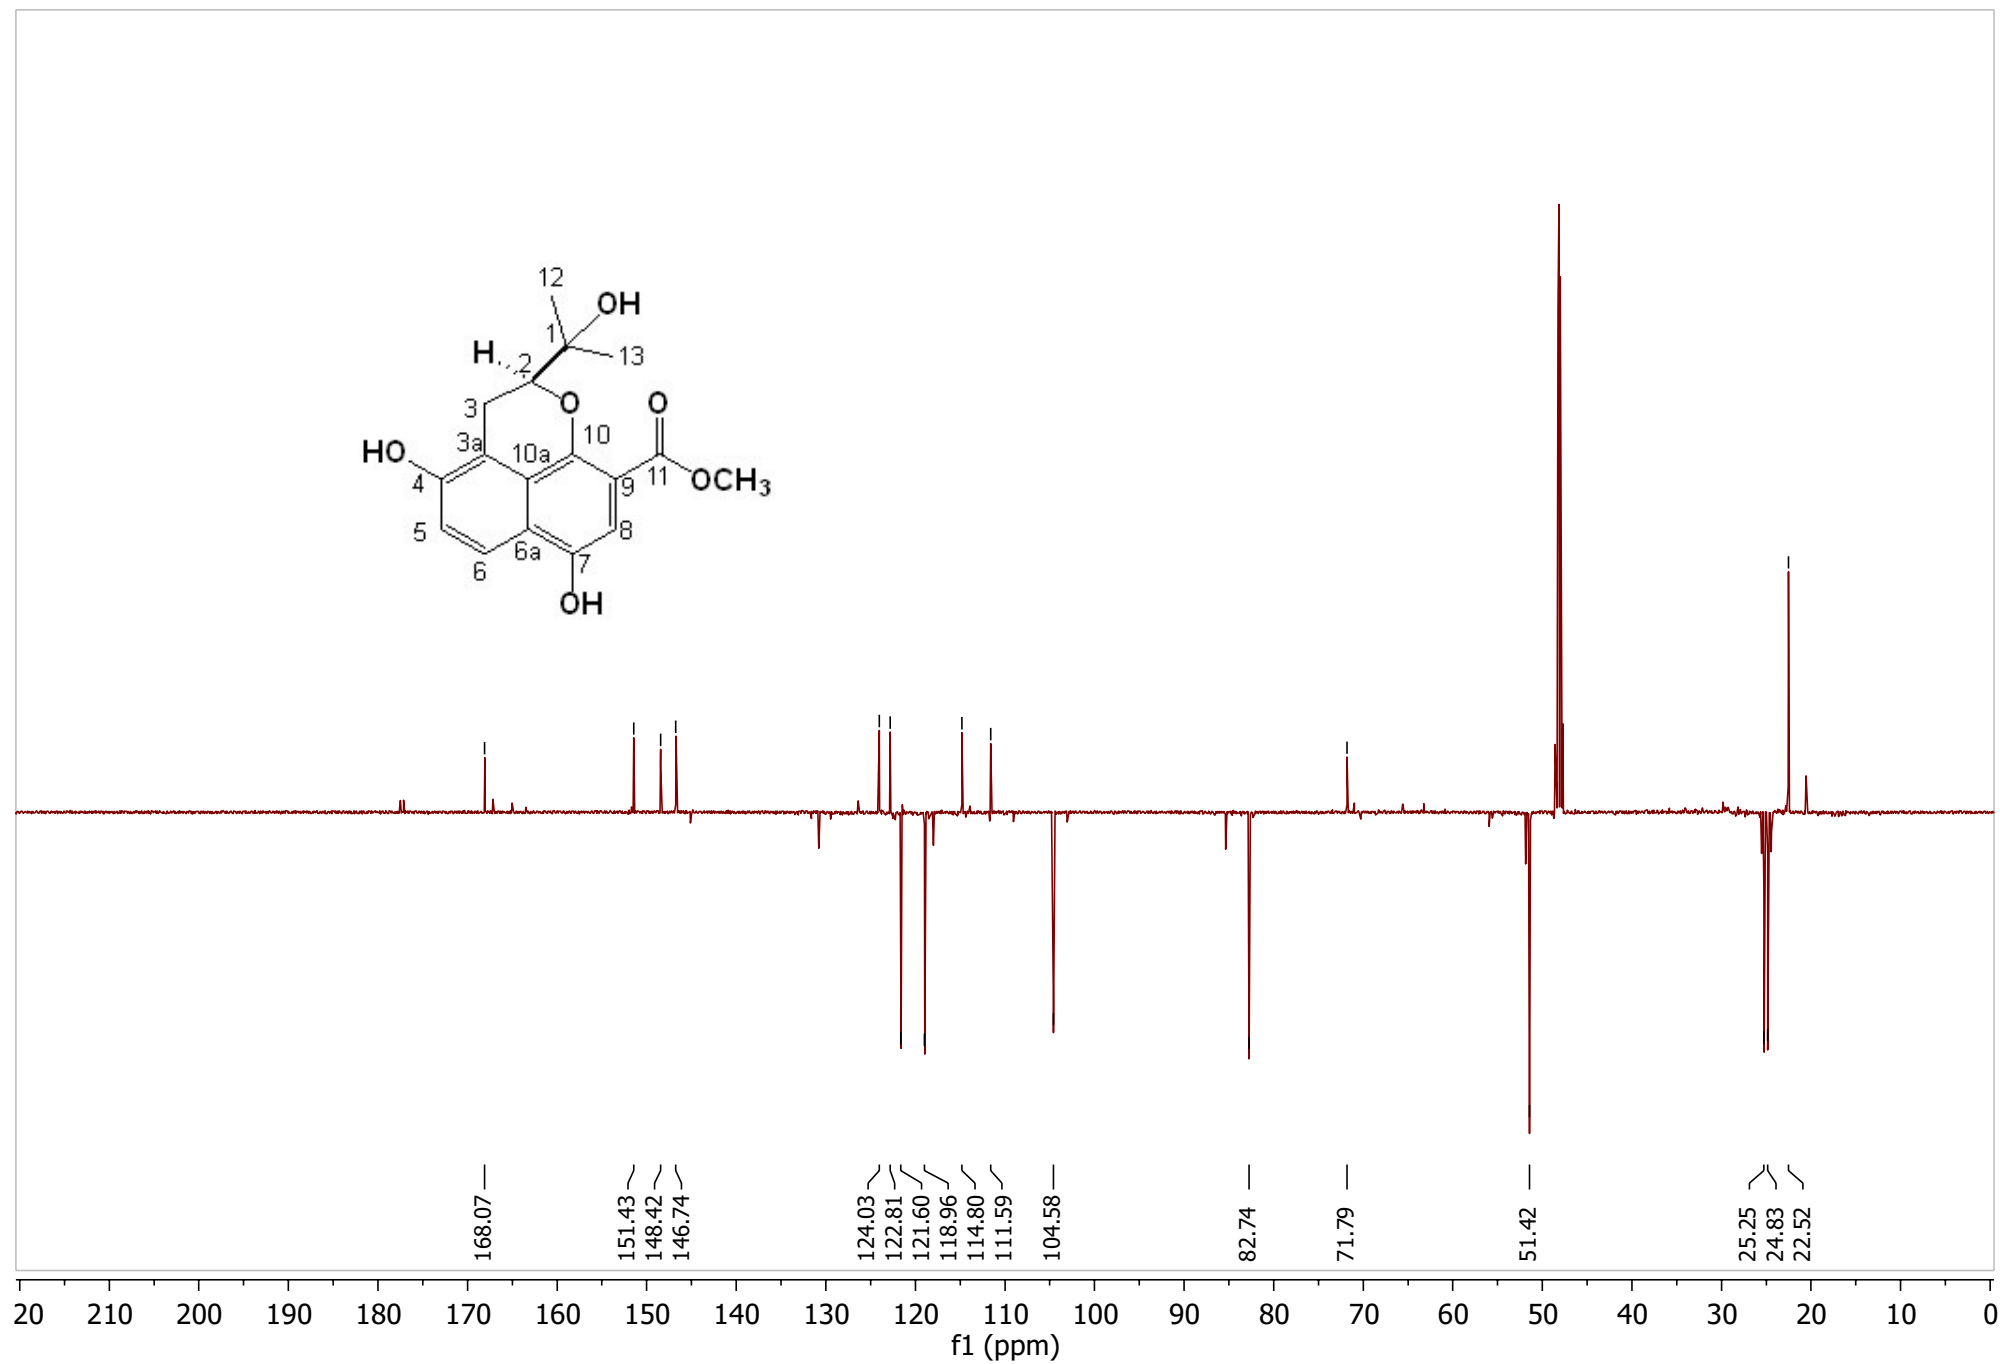

Figure S4.  $^{13}\text{C}$  DEPT (CD $_3$ OD, 125 MHz) of ternifoliol (1)

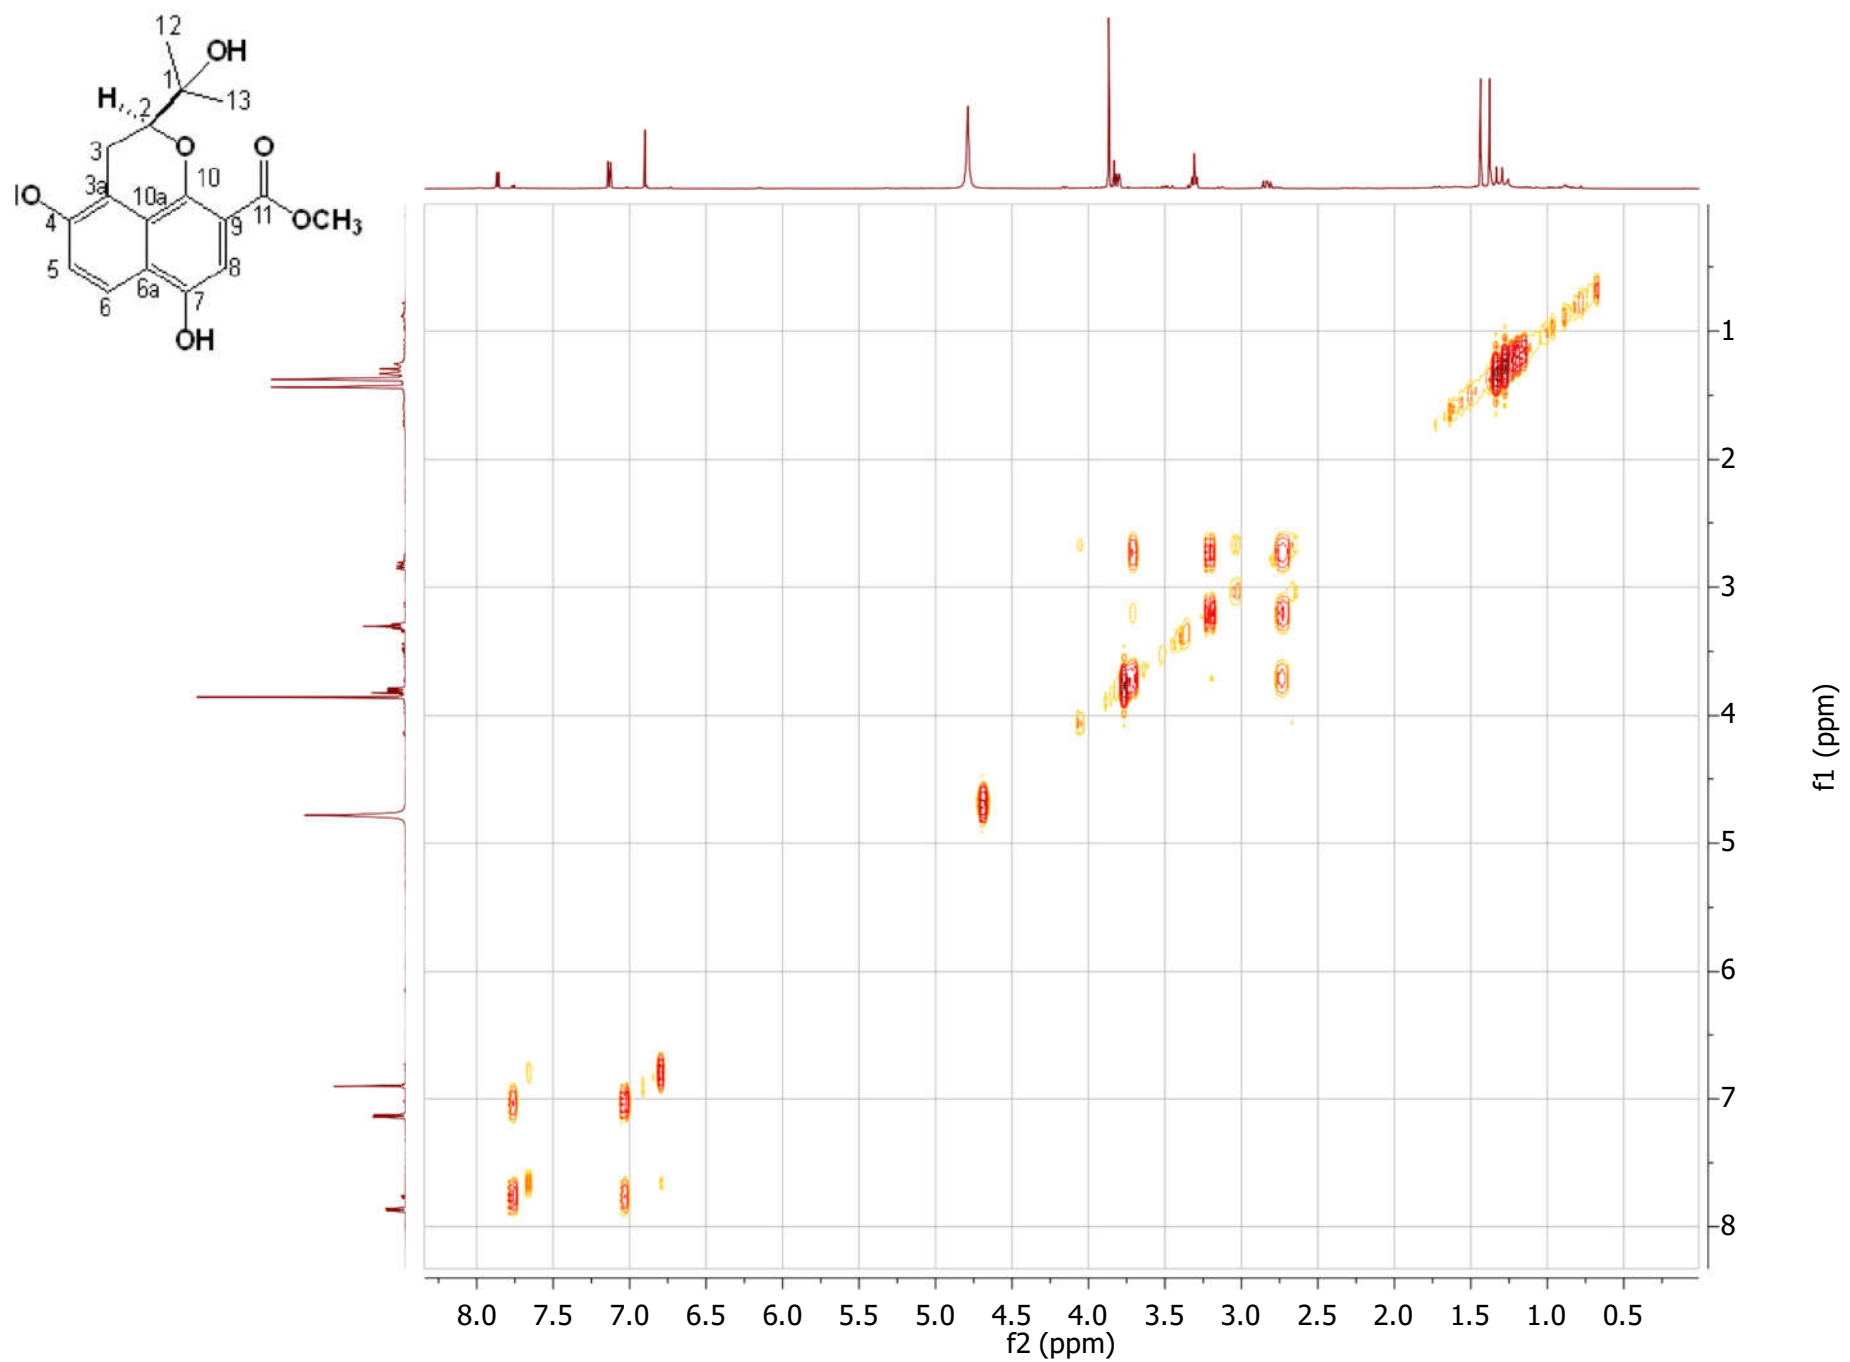

Figure S5.  $^1\text{H}$ - $^1\text{H}$  COSY NMR ( $\text{CD}_3\text{OD}$ , 400 MHz) of ternifoliol (1)

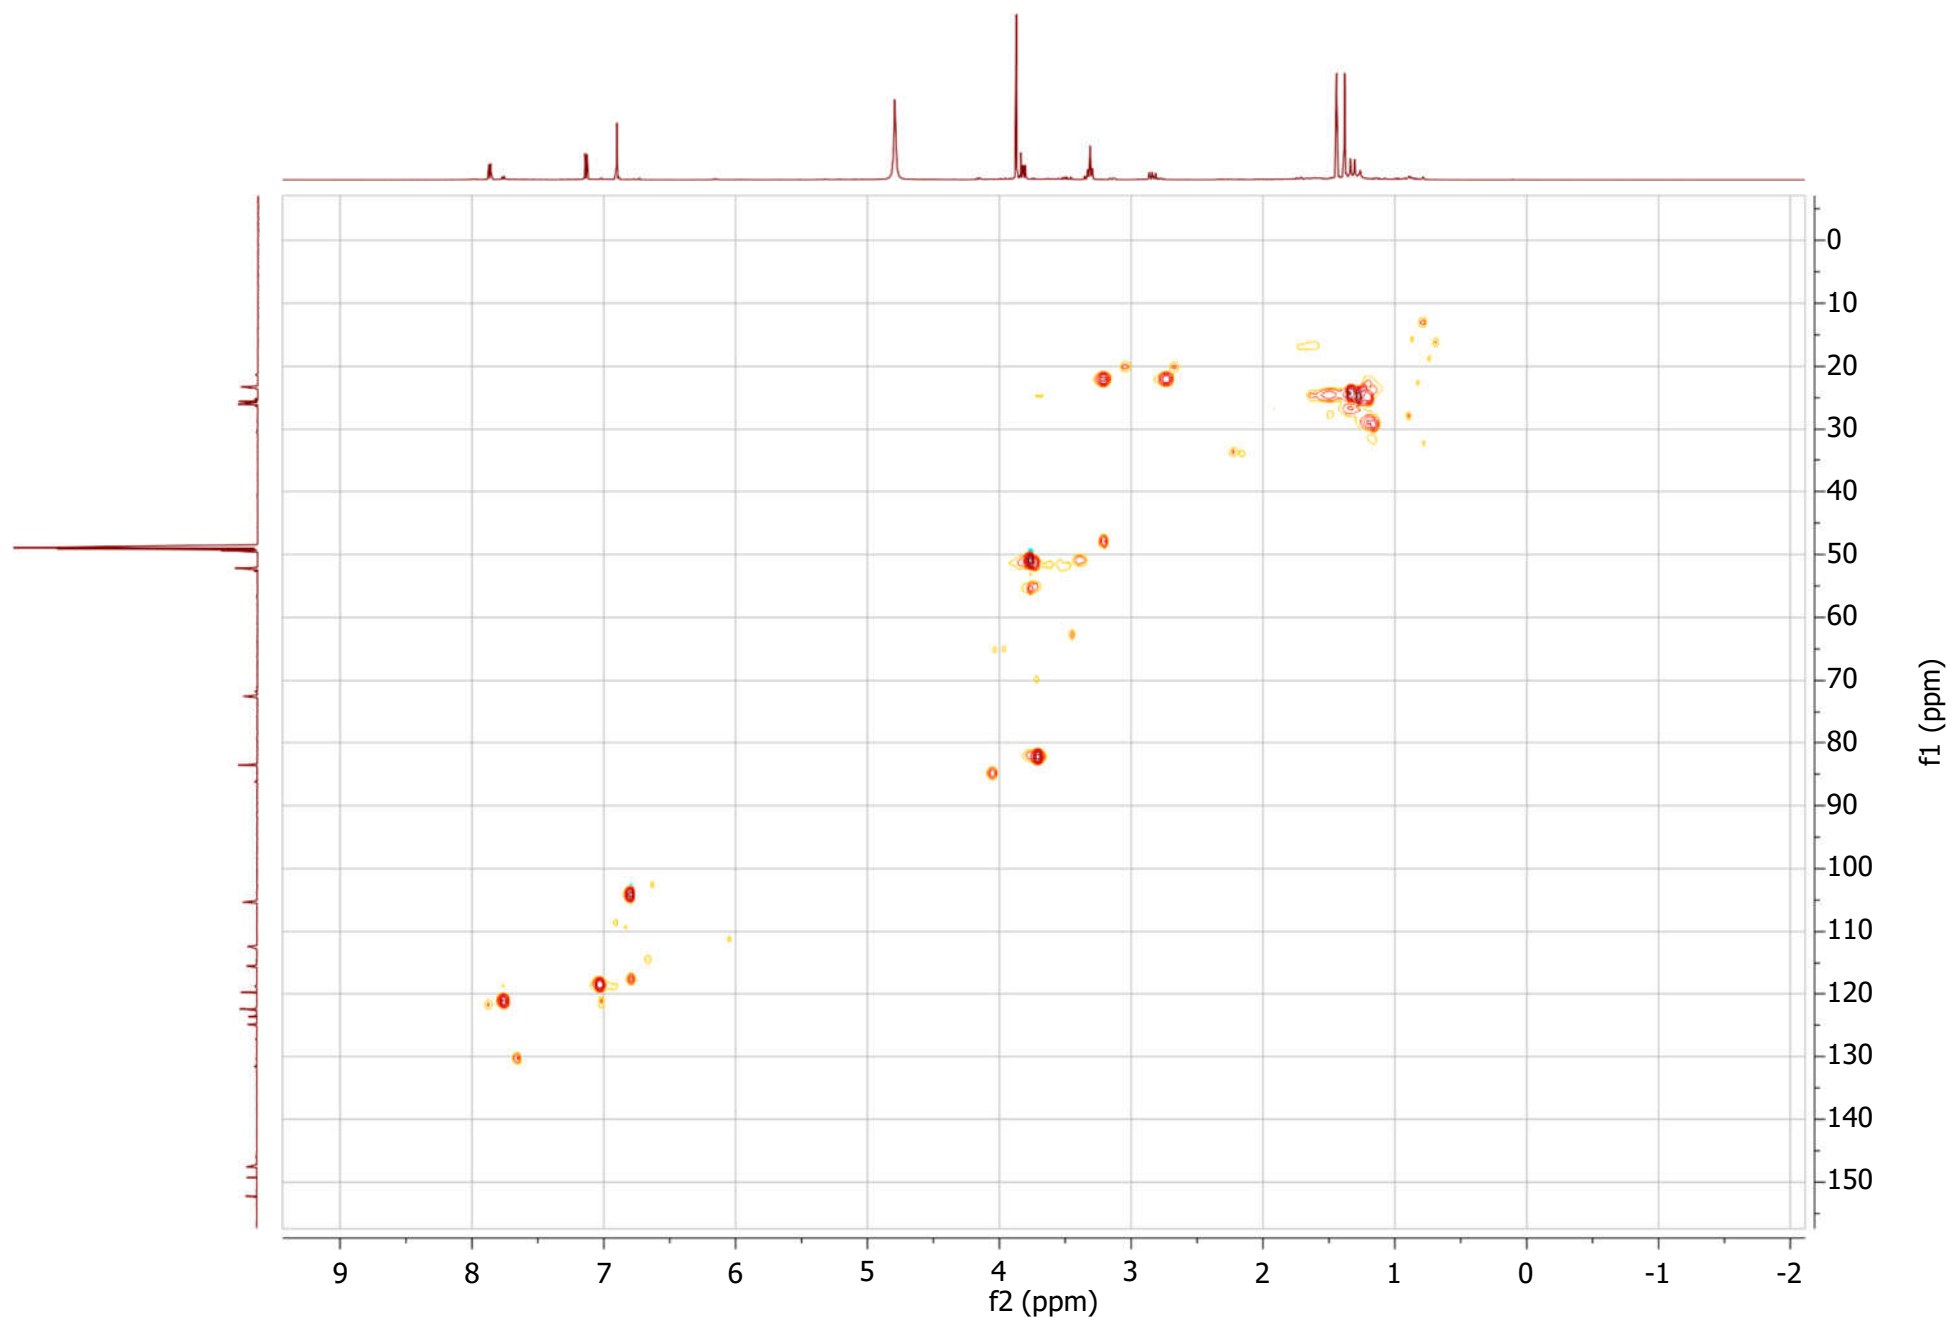

Figure S6.  $^1\text{H}$ - $^{13}\text{C}$  (HSQC) NMR ( $\text{CD}_3\text{OD}$ , 400 MHz) of ternifoliol (**1**)



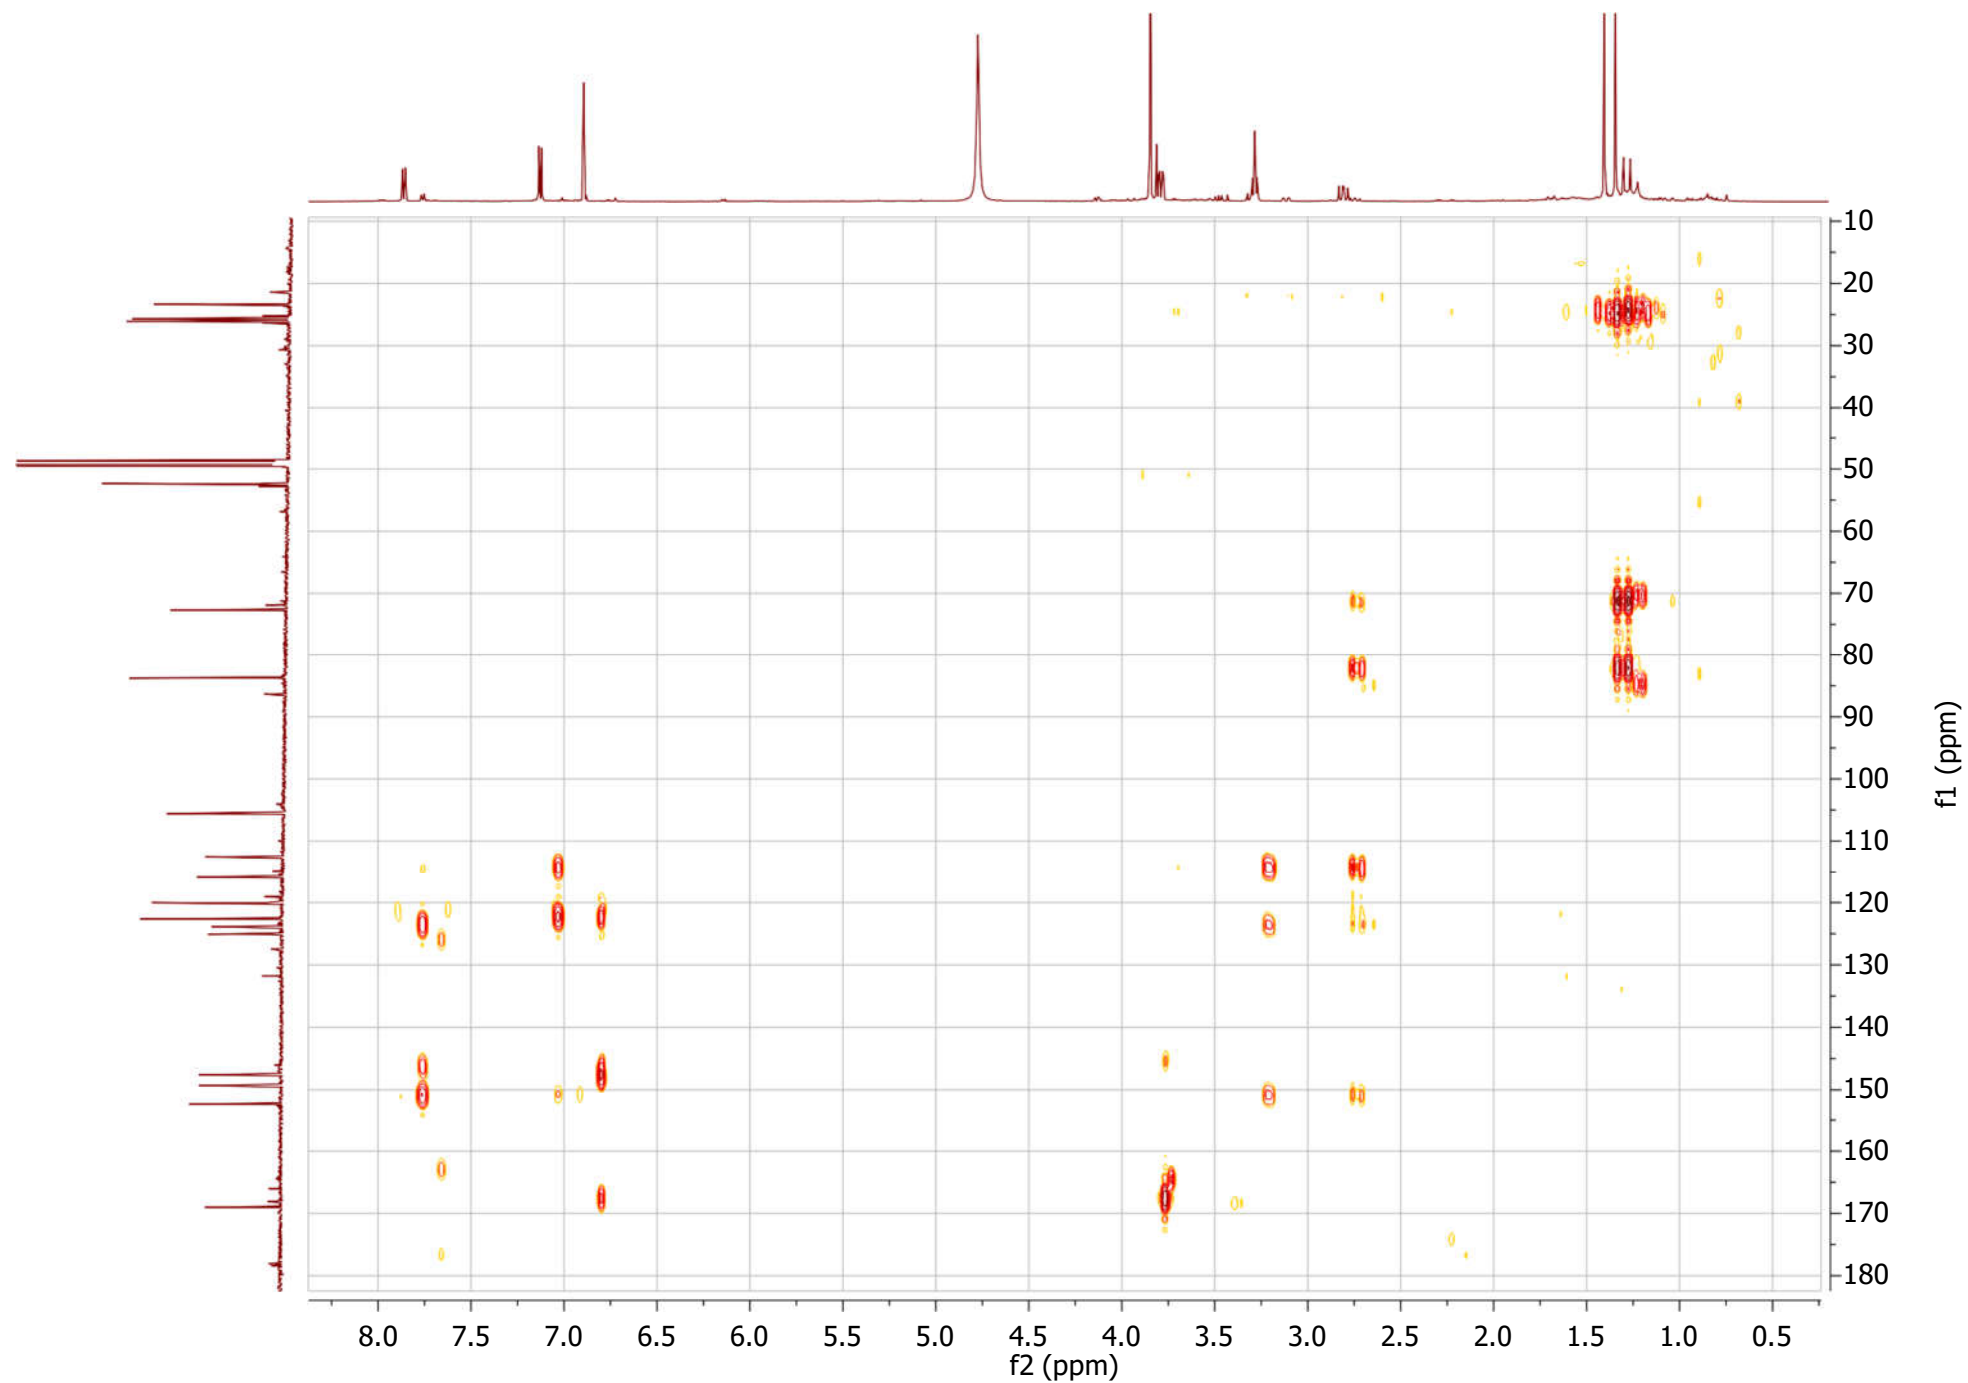

Figure S7.  $^1\text{H}$ - $^{13}\text{C}$  (HMBC) NMR ( $\text{CD}_3\text{OD}$ , 400 MHz) of ternifoliol (**1**)

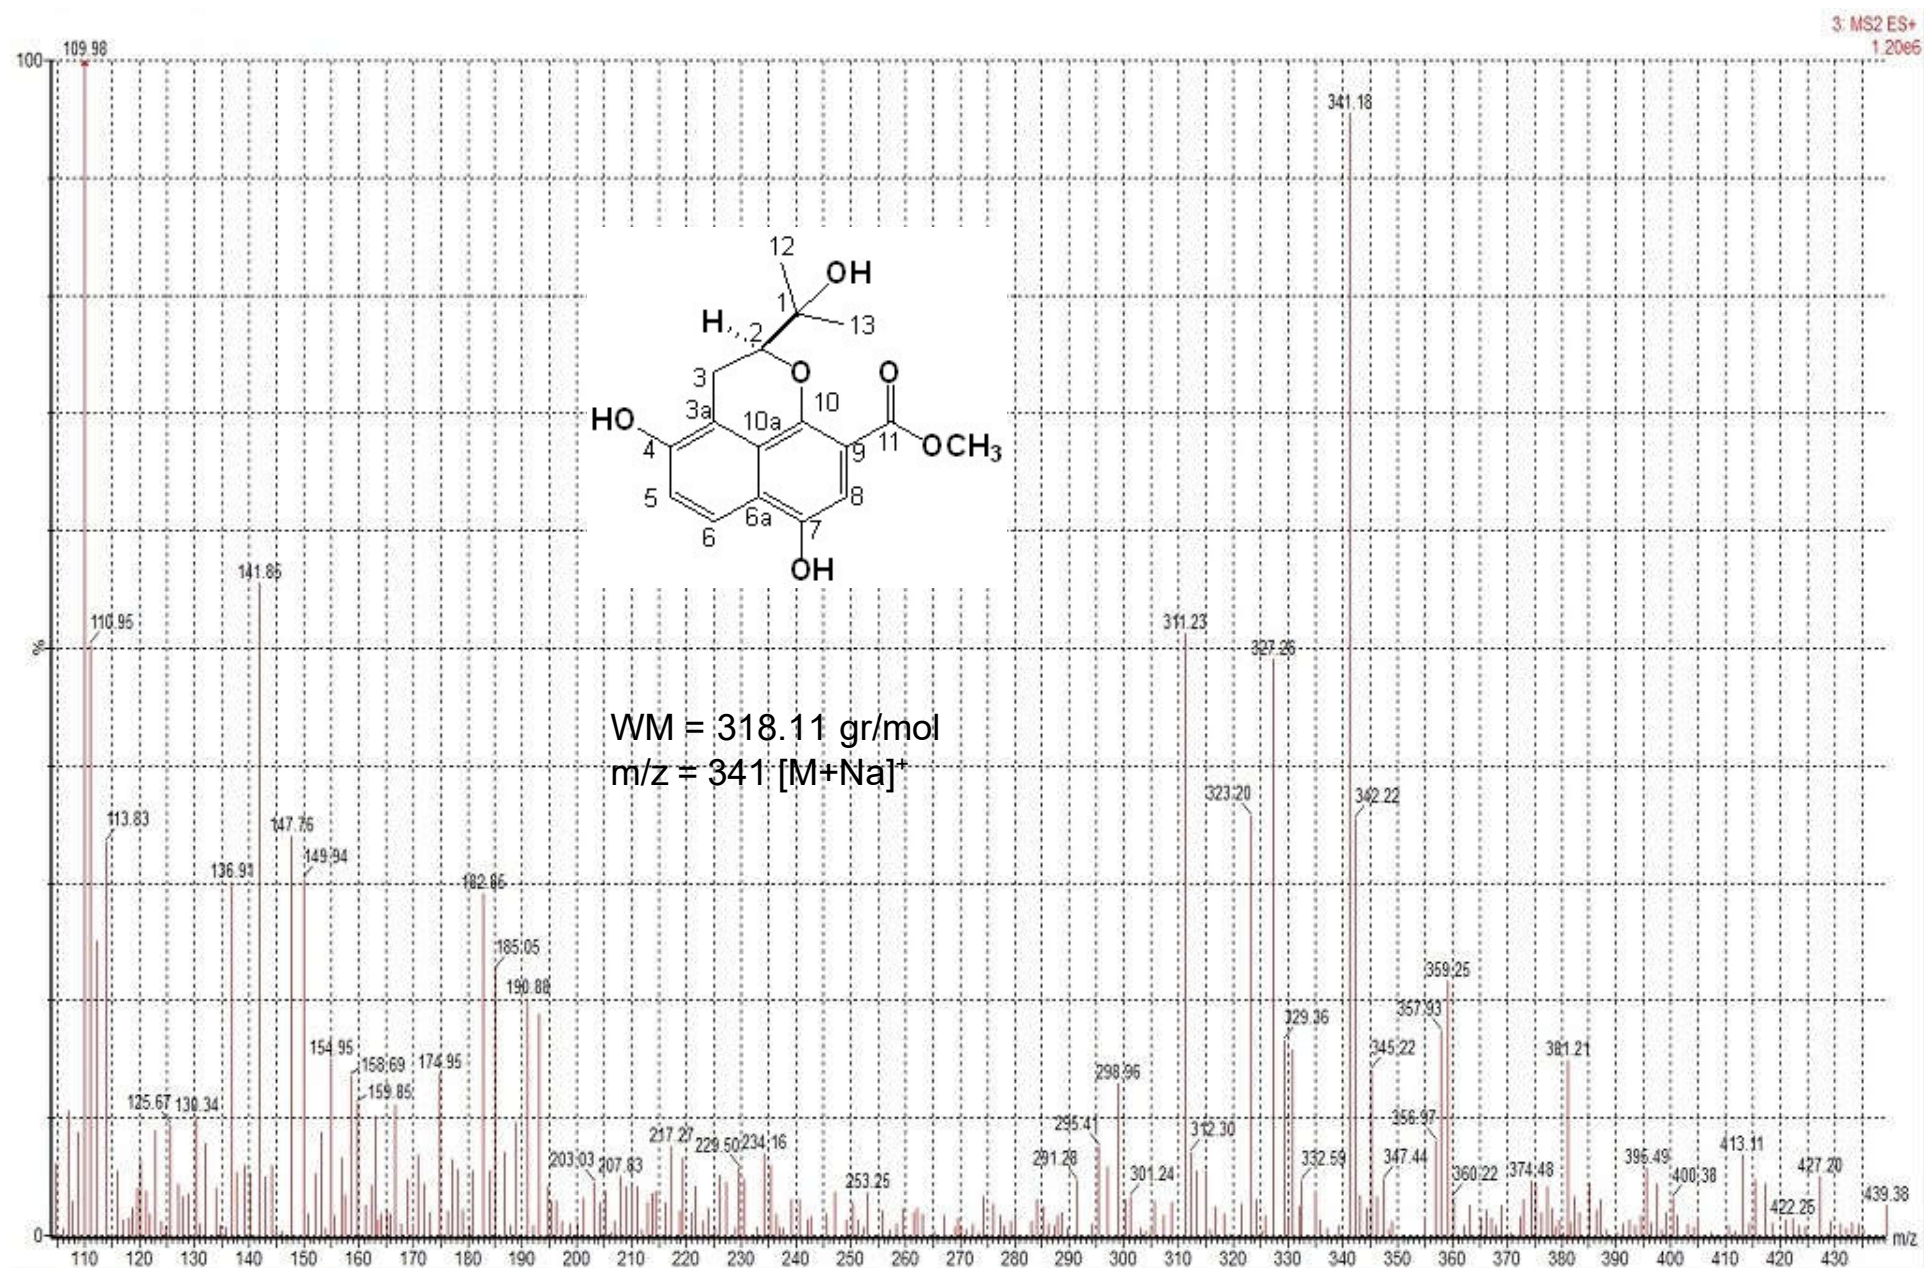

Figure S8. Mass spectrum (MS) of ternifoliol (1)

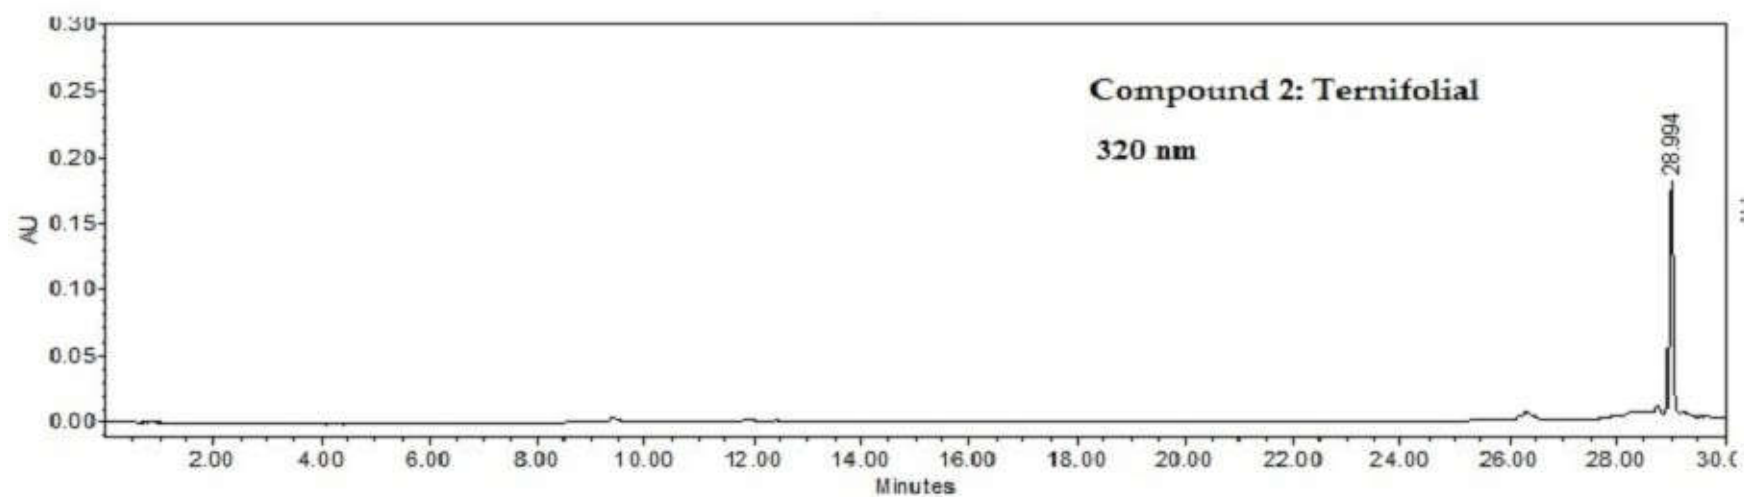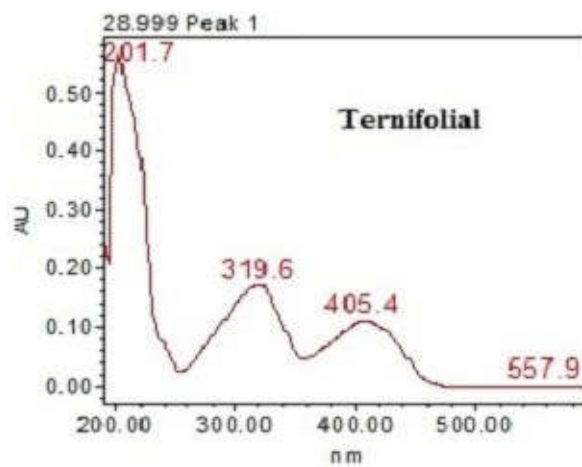

Figure S9. Spectrum UV of ternifolial (**2**)

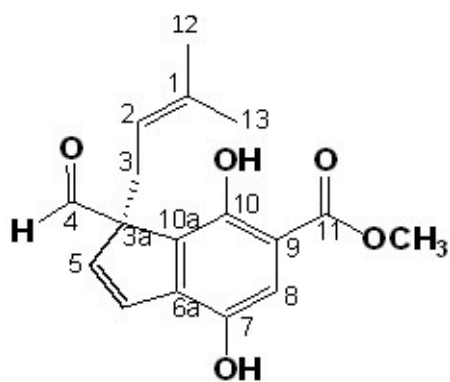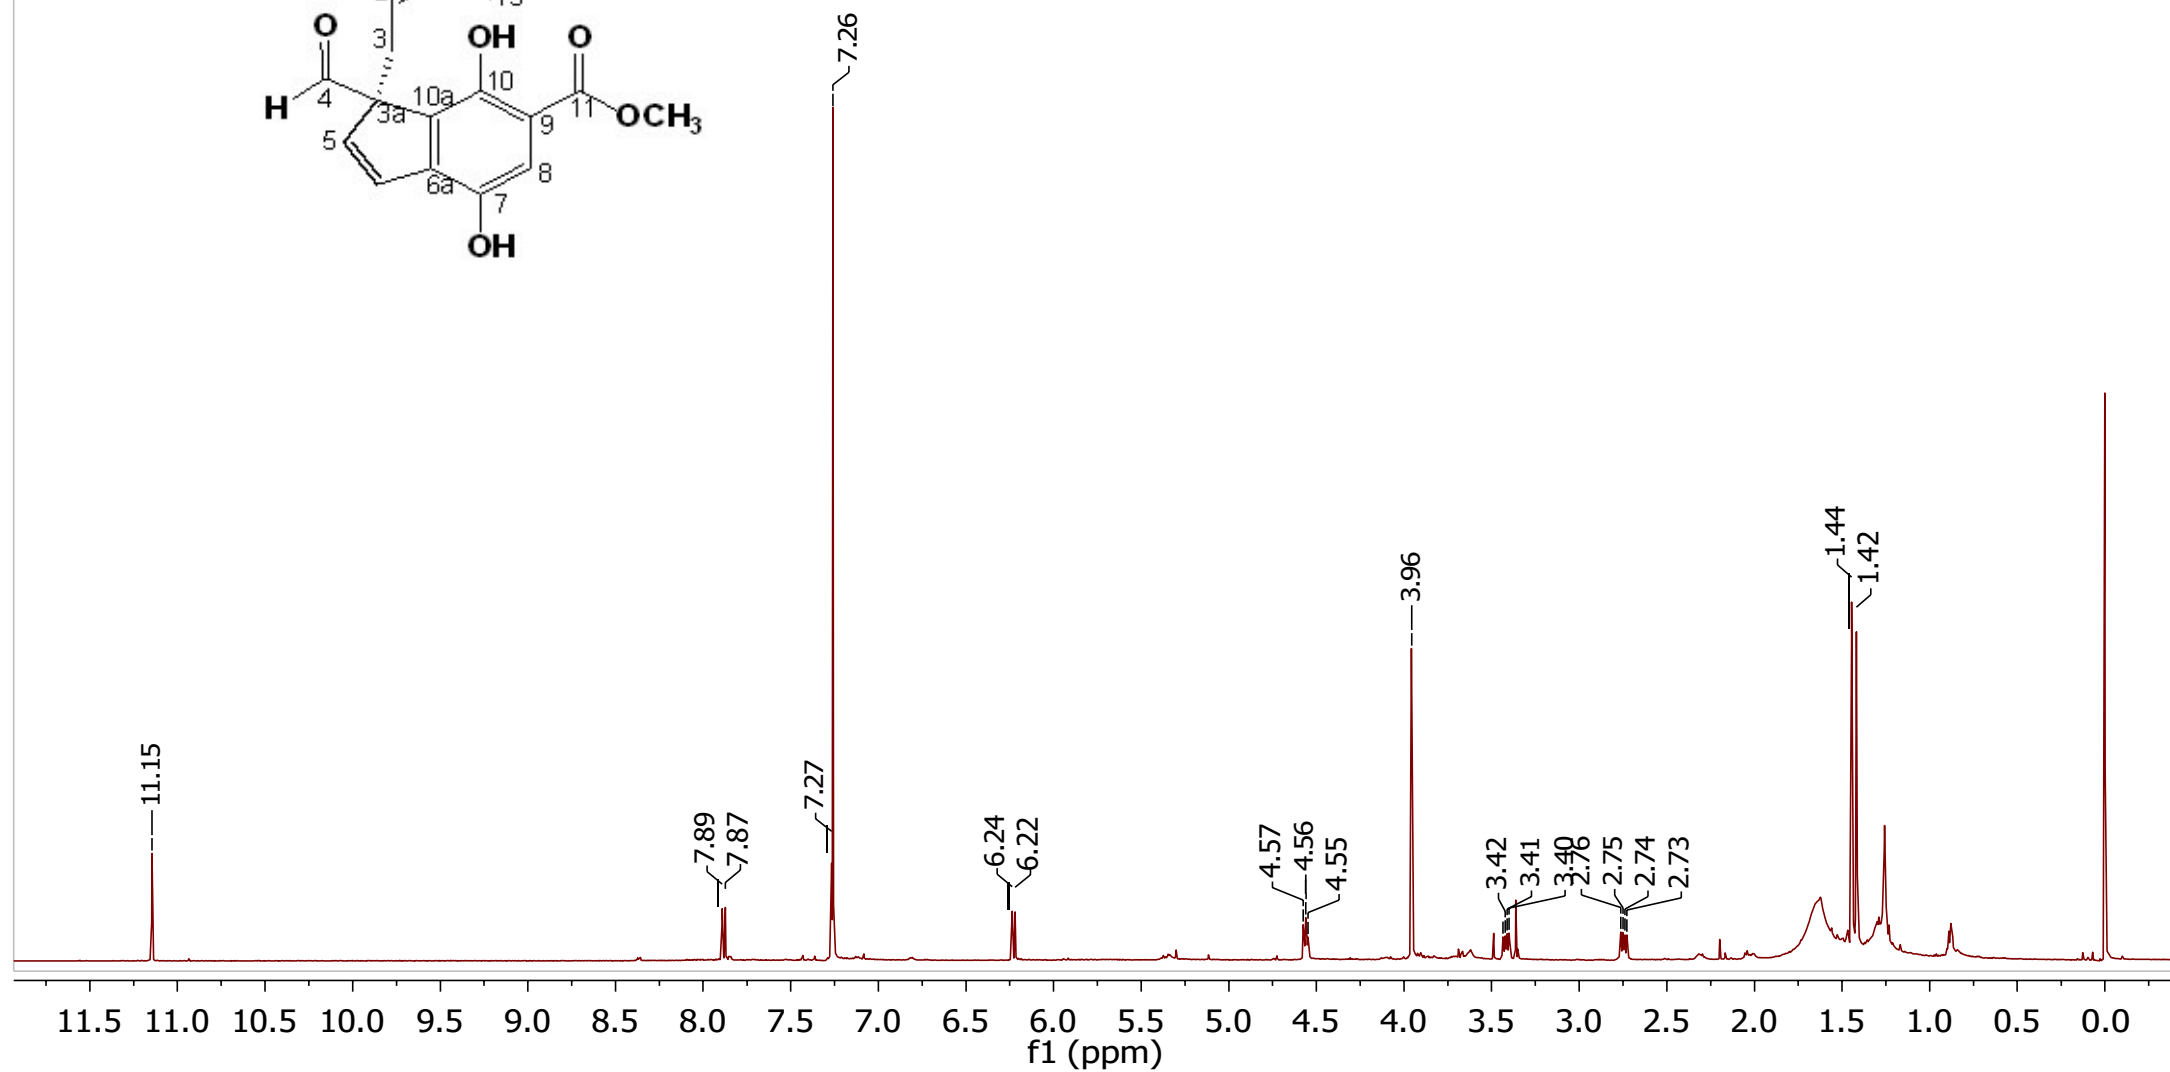

Figure S10.  $^1\text{H}$  NMR ( $\text{CDCl}_3$ , 600 MHz) of ternifolial (**2**)

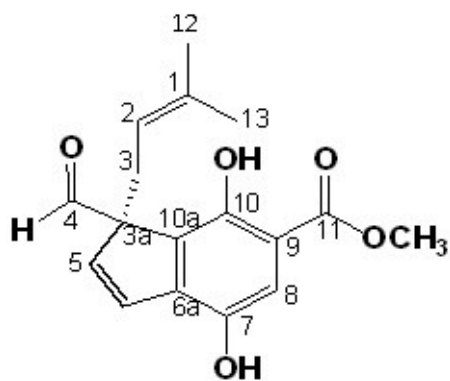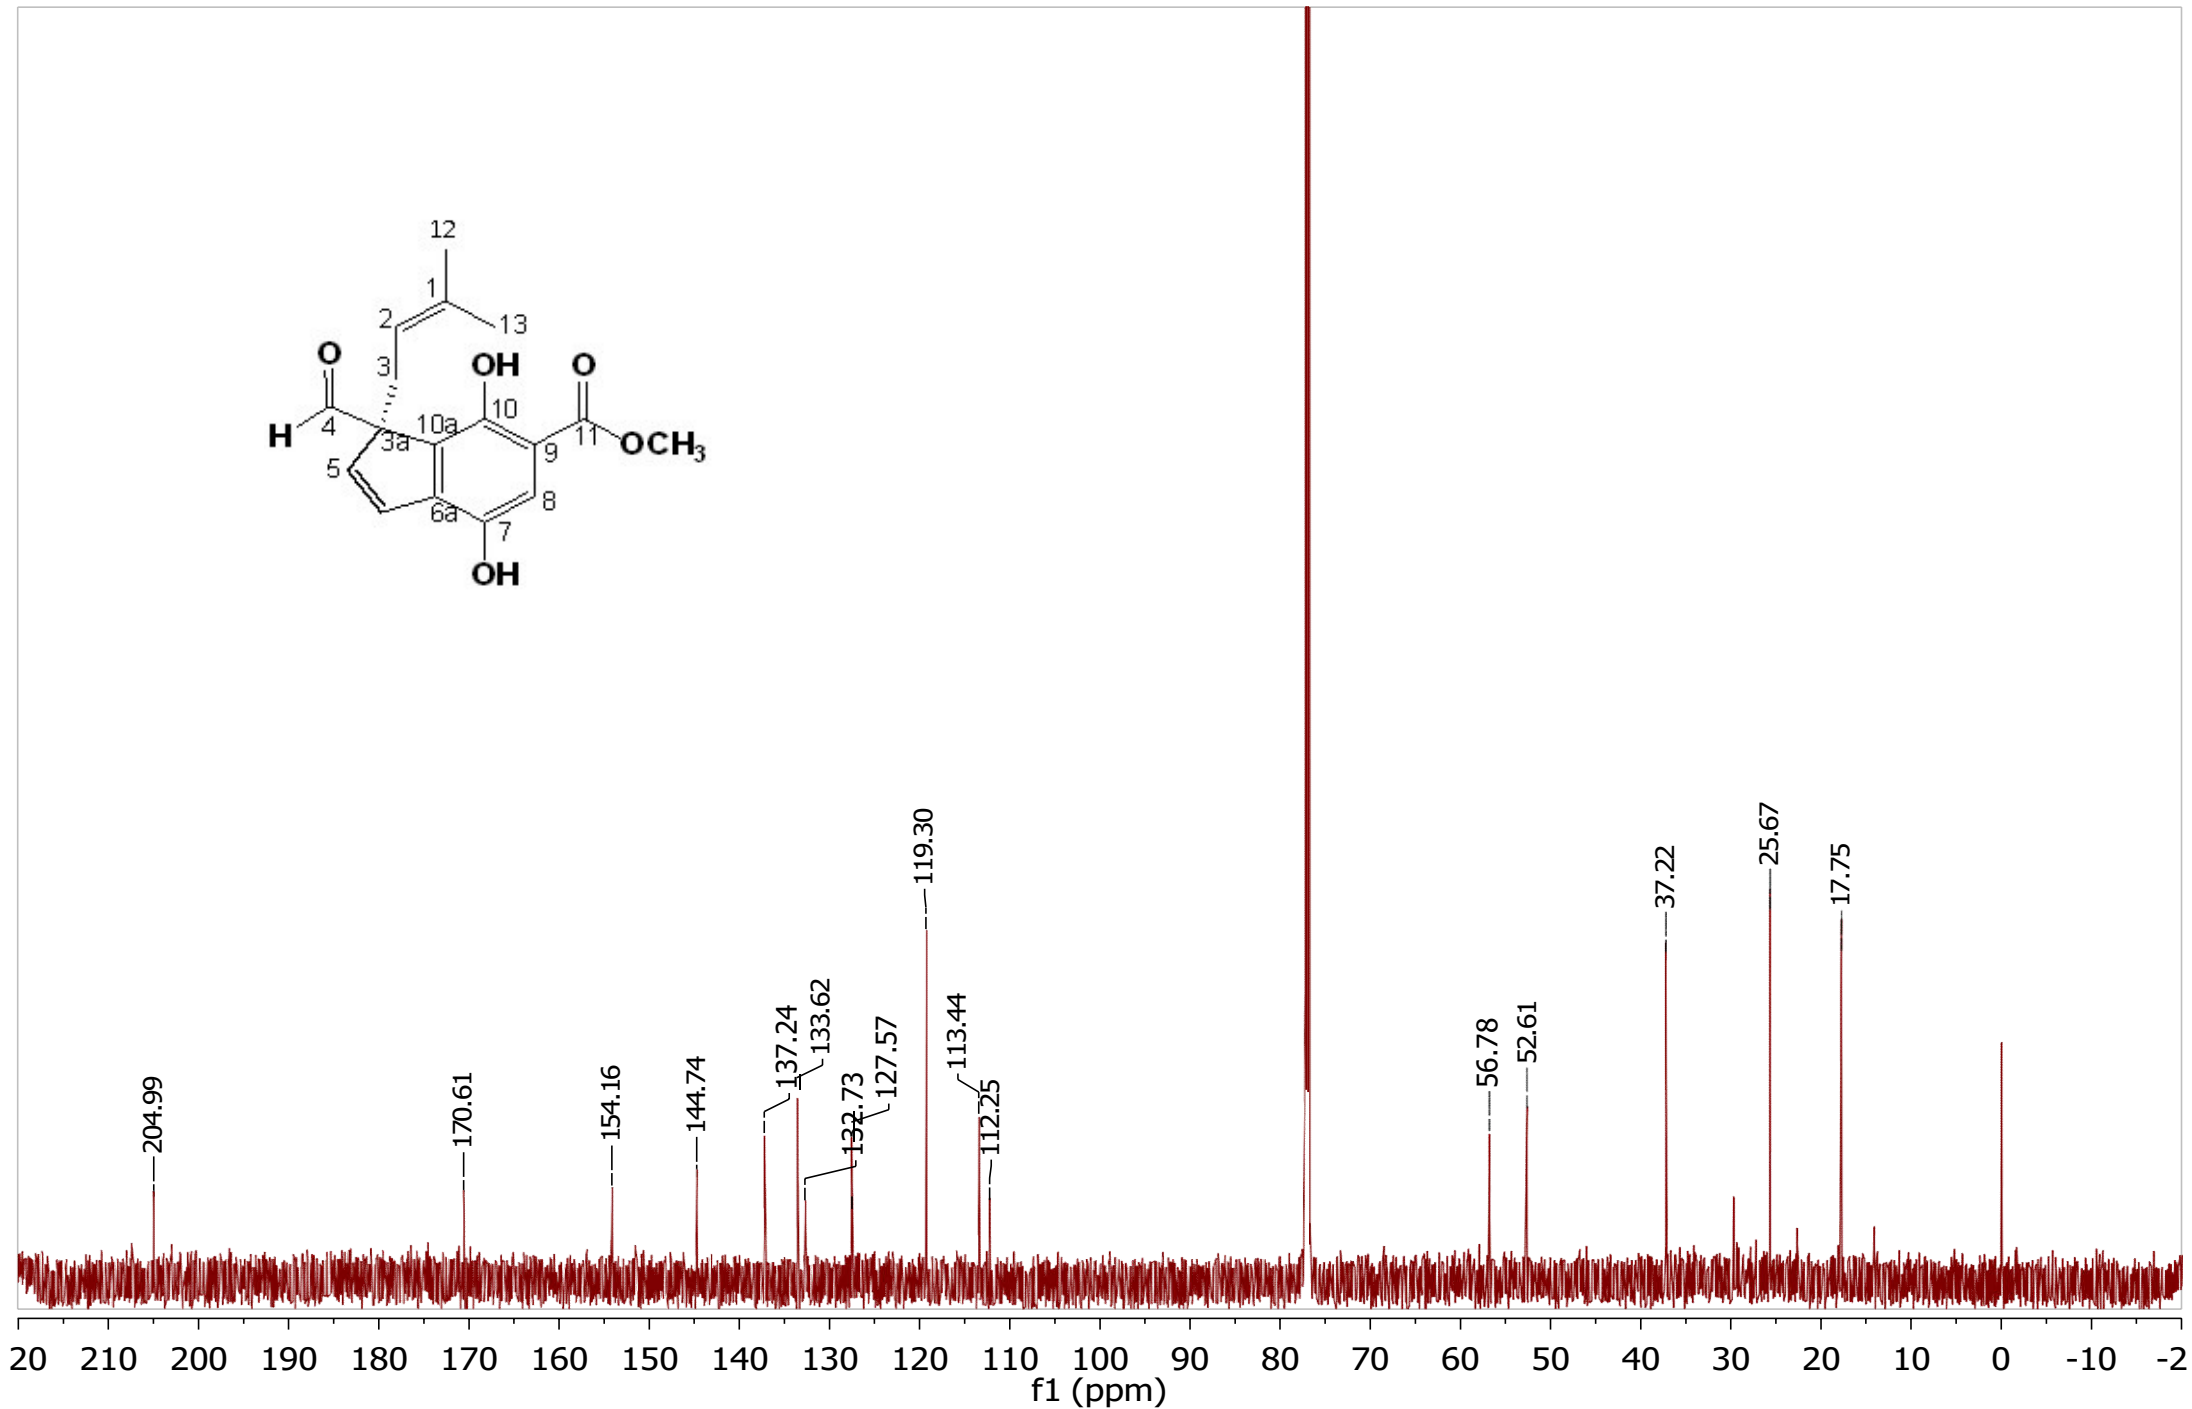

Figure S11. <sup>13</sup>C NMR (CDCl<sub>3</sub>, 150 MHz) of ternifolial (**2**)

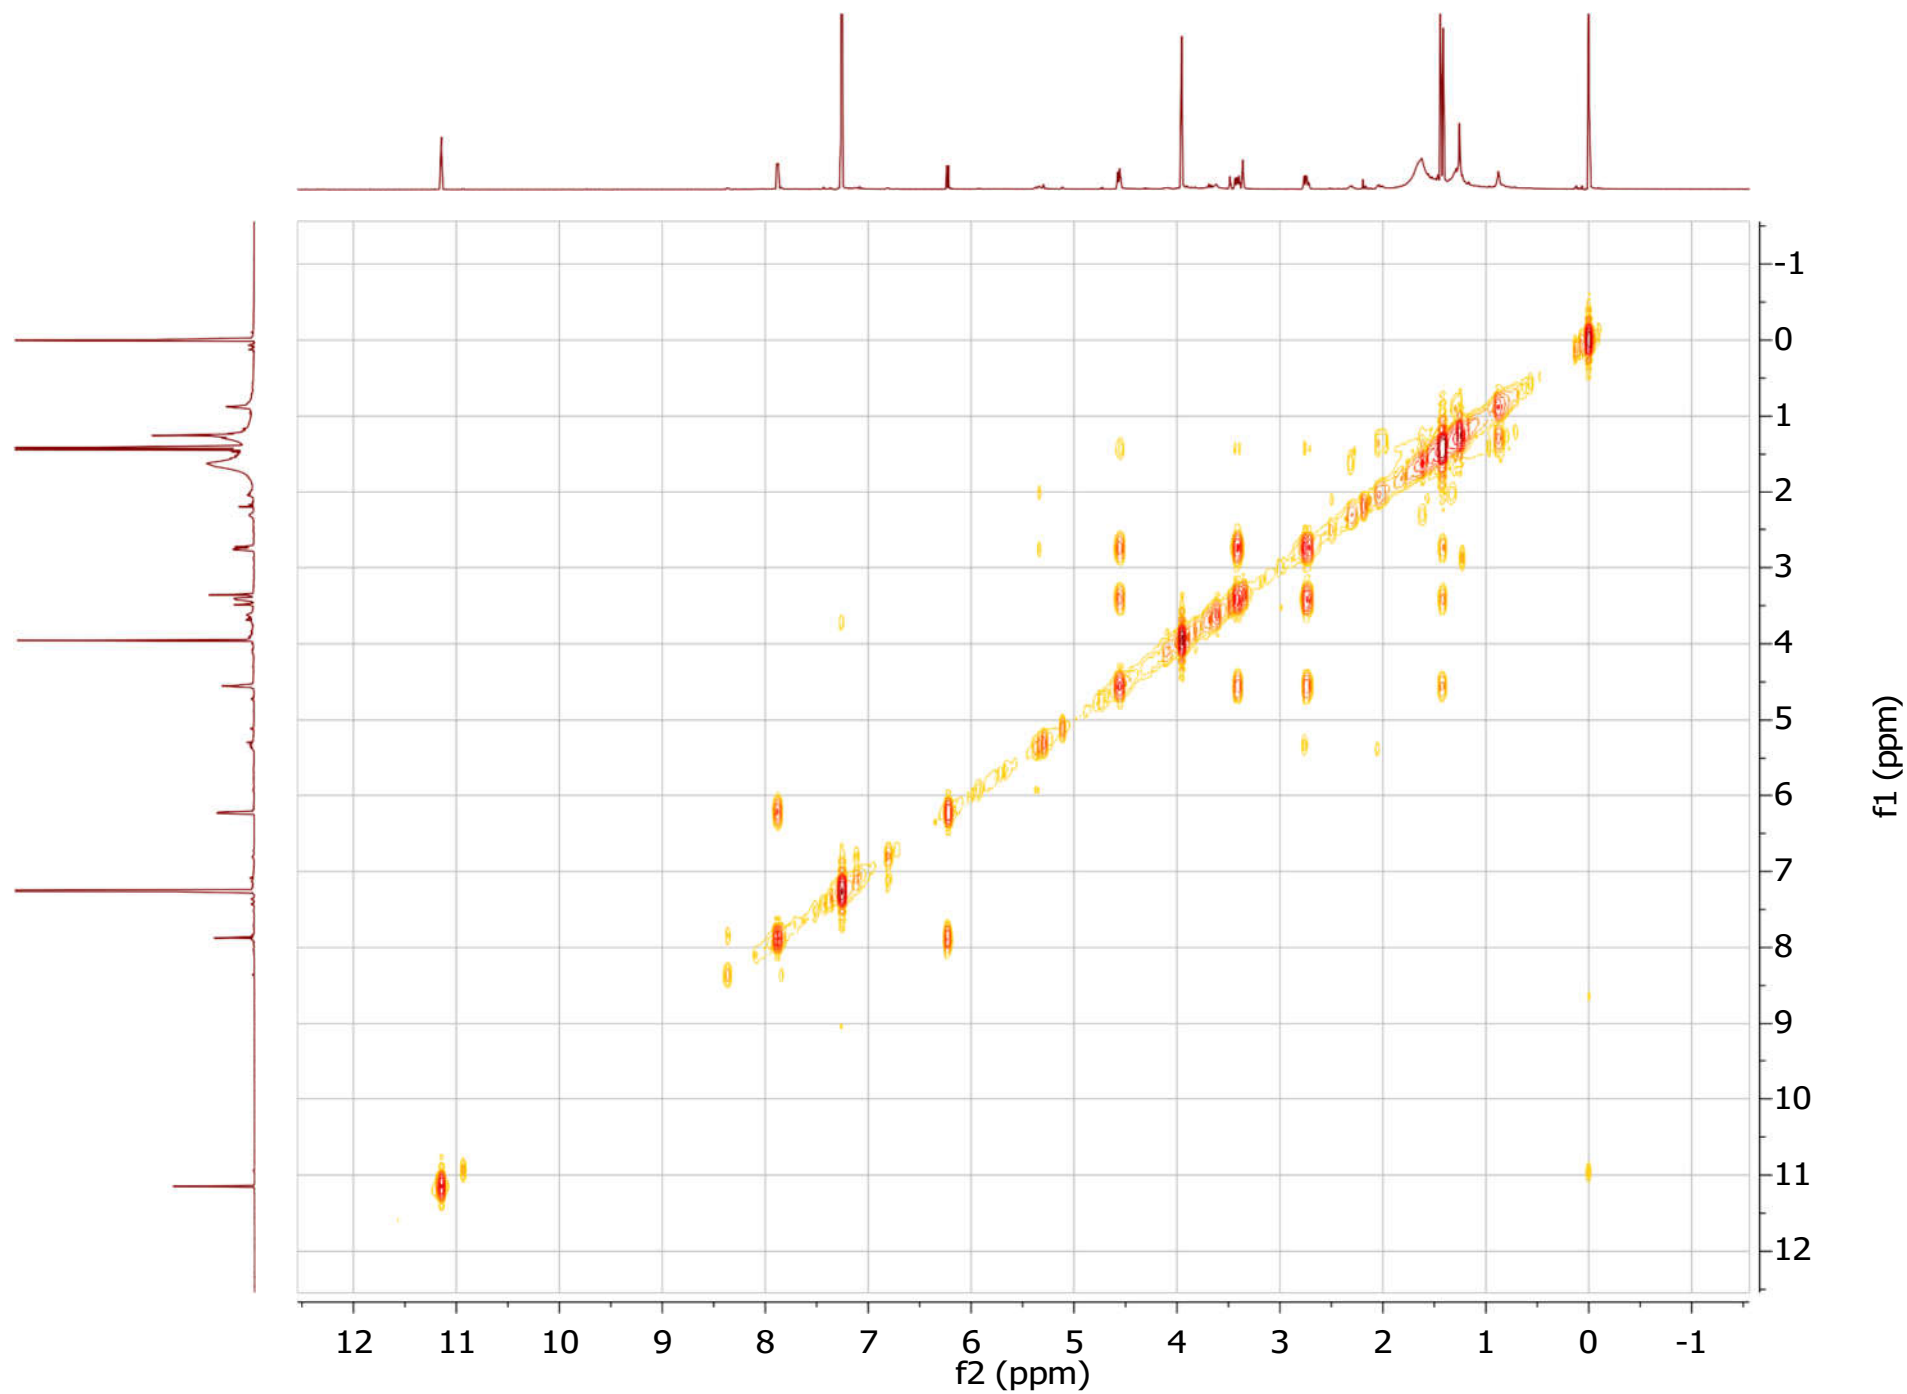

Figure S12.  $^1\text{H}$ - $^1\text{H}$  COSY NMR ( $\text{CDCl}_3$ , 600 MHz) of ternifolial (**2**)



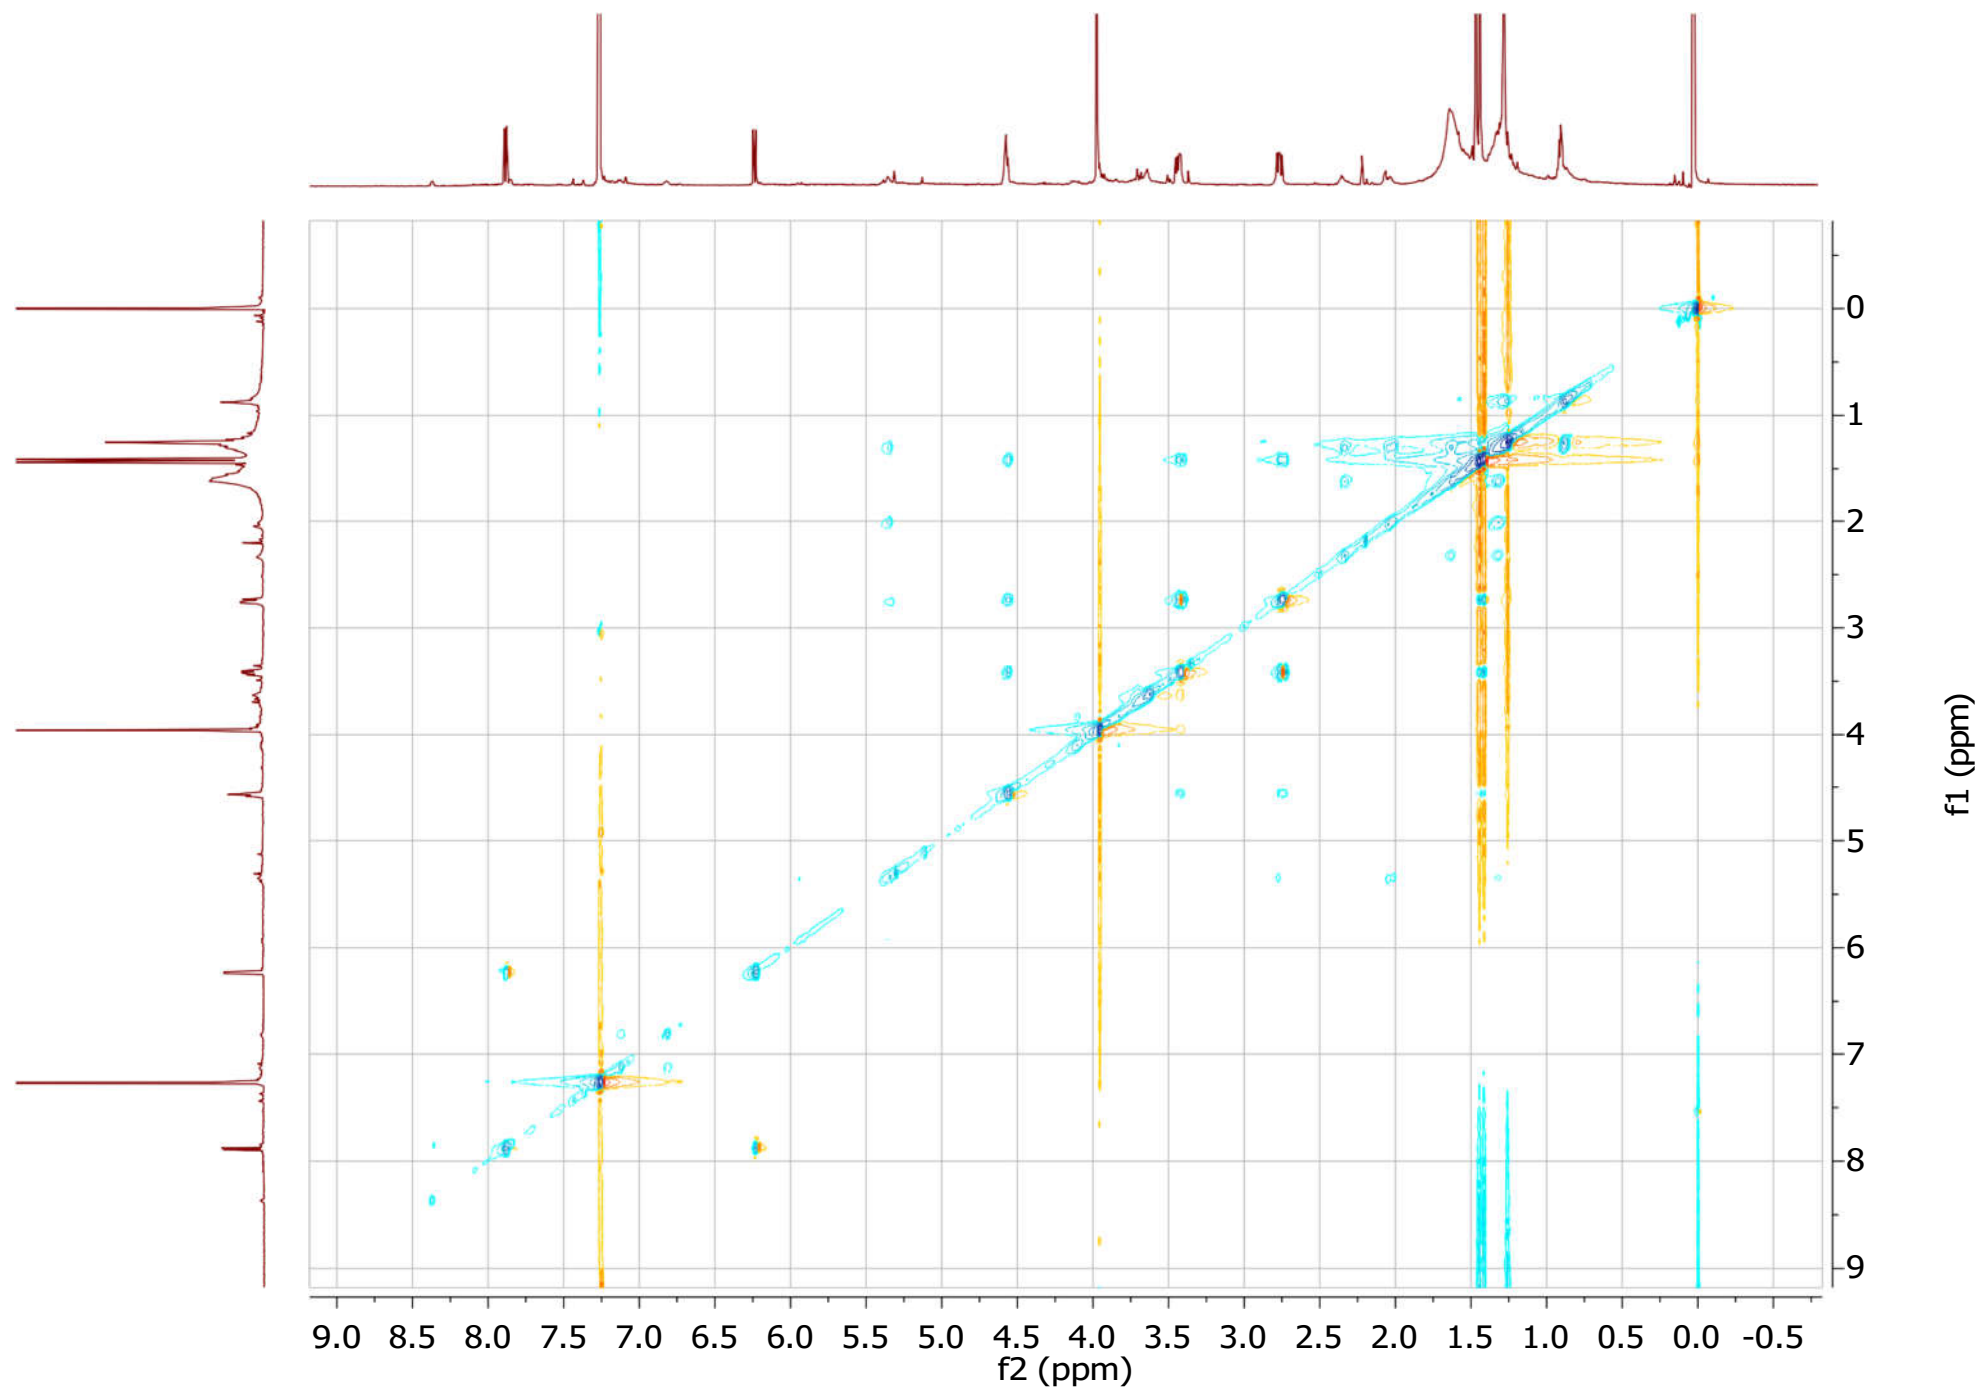

Figure S13.  $^1\text{H}$ - $^1\text{H}$  TOCSY NMR ( $\text{CDCl}_3$ , 600 MHz) of ternifolial (**2**)

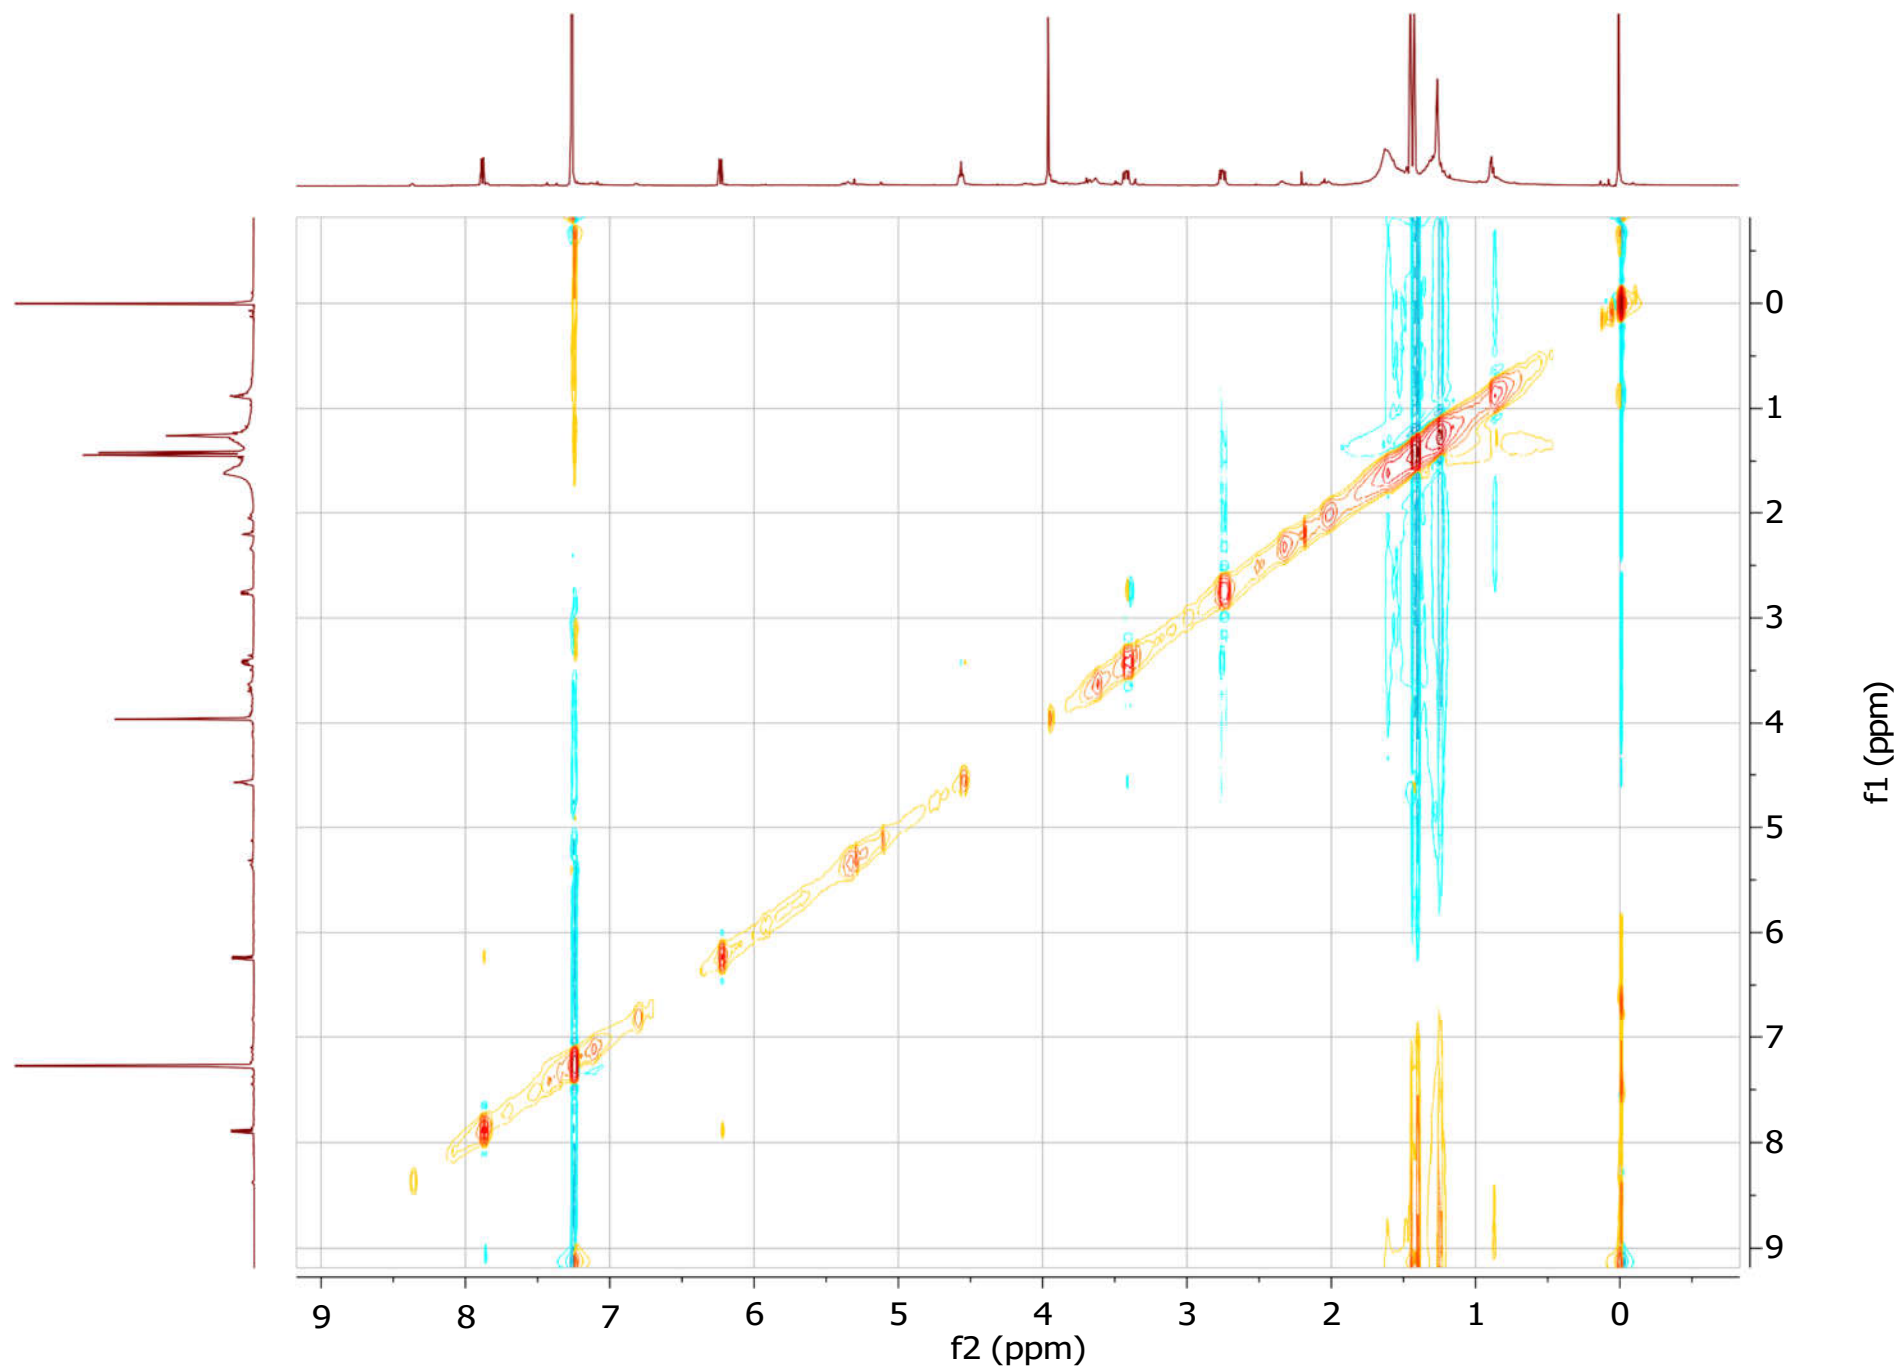

Figure S14.  $^1\text{H}$ - $^1\text{H}$  NOESY NMR ( $\text{CDCl}_3$ , 600 MHz) of ternifolial (**2**)



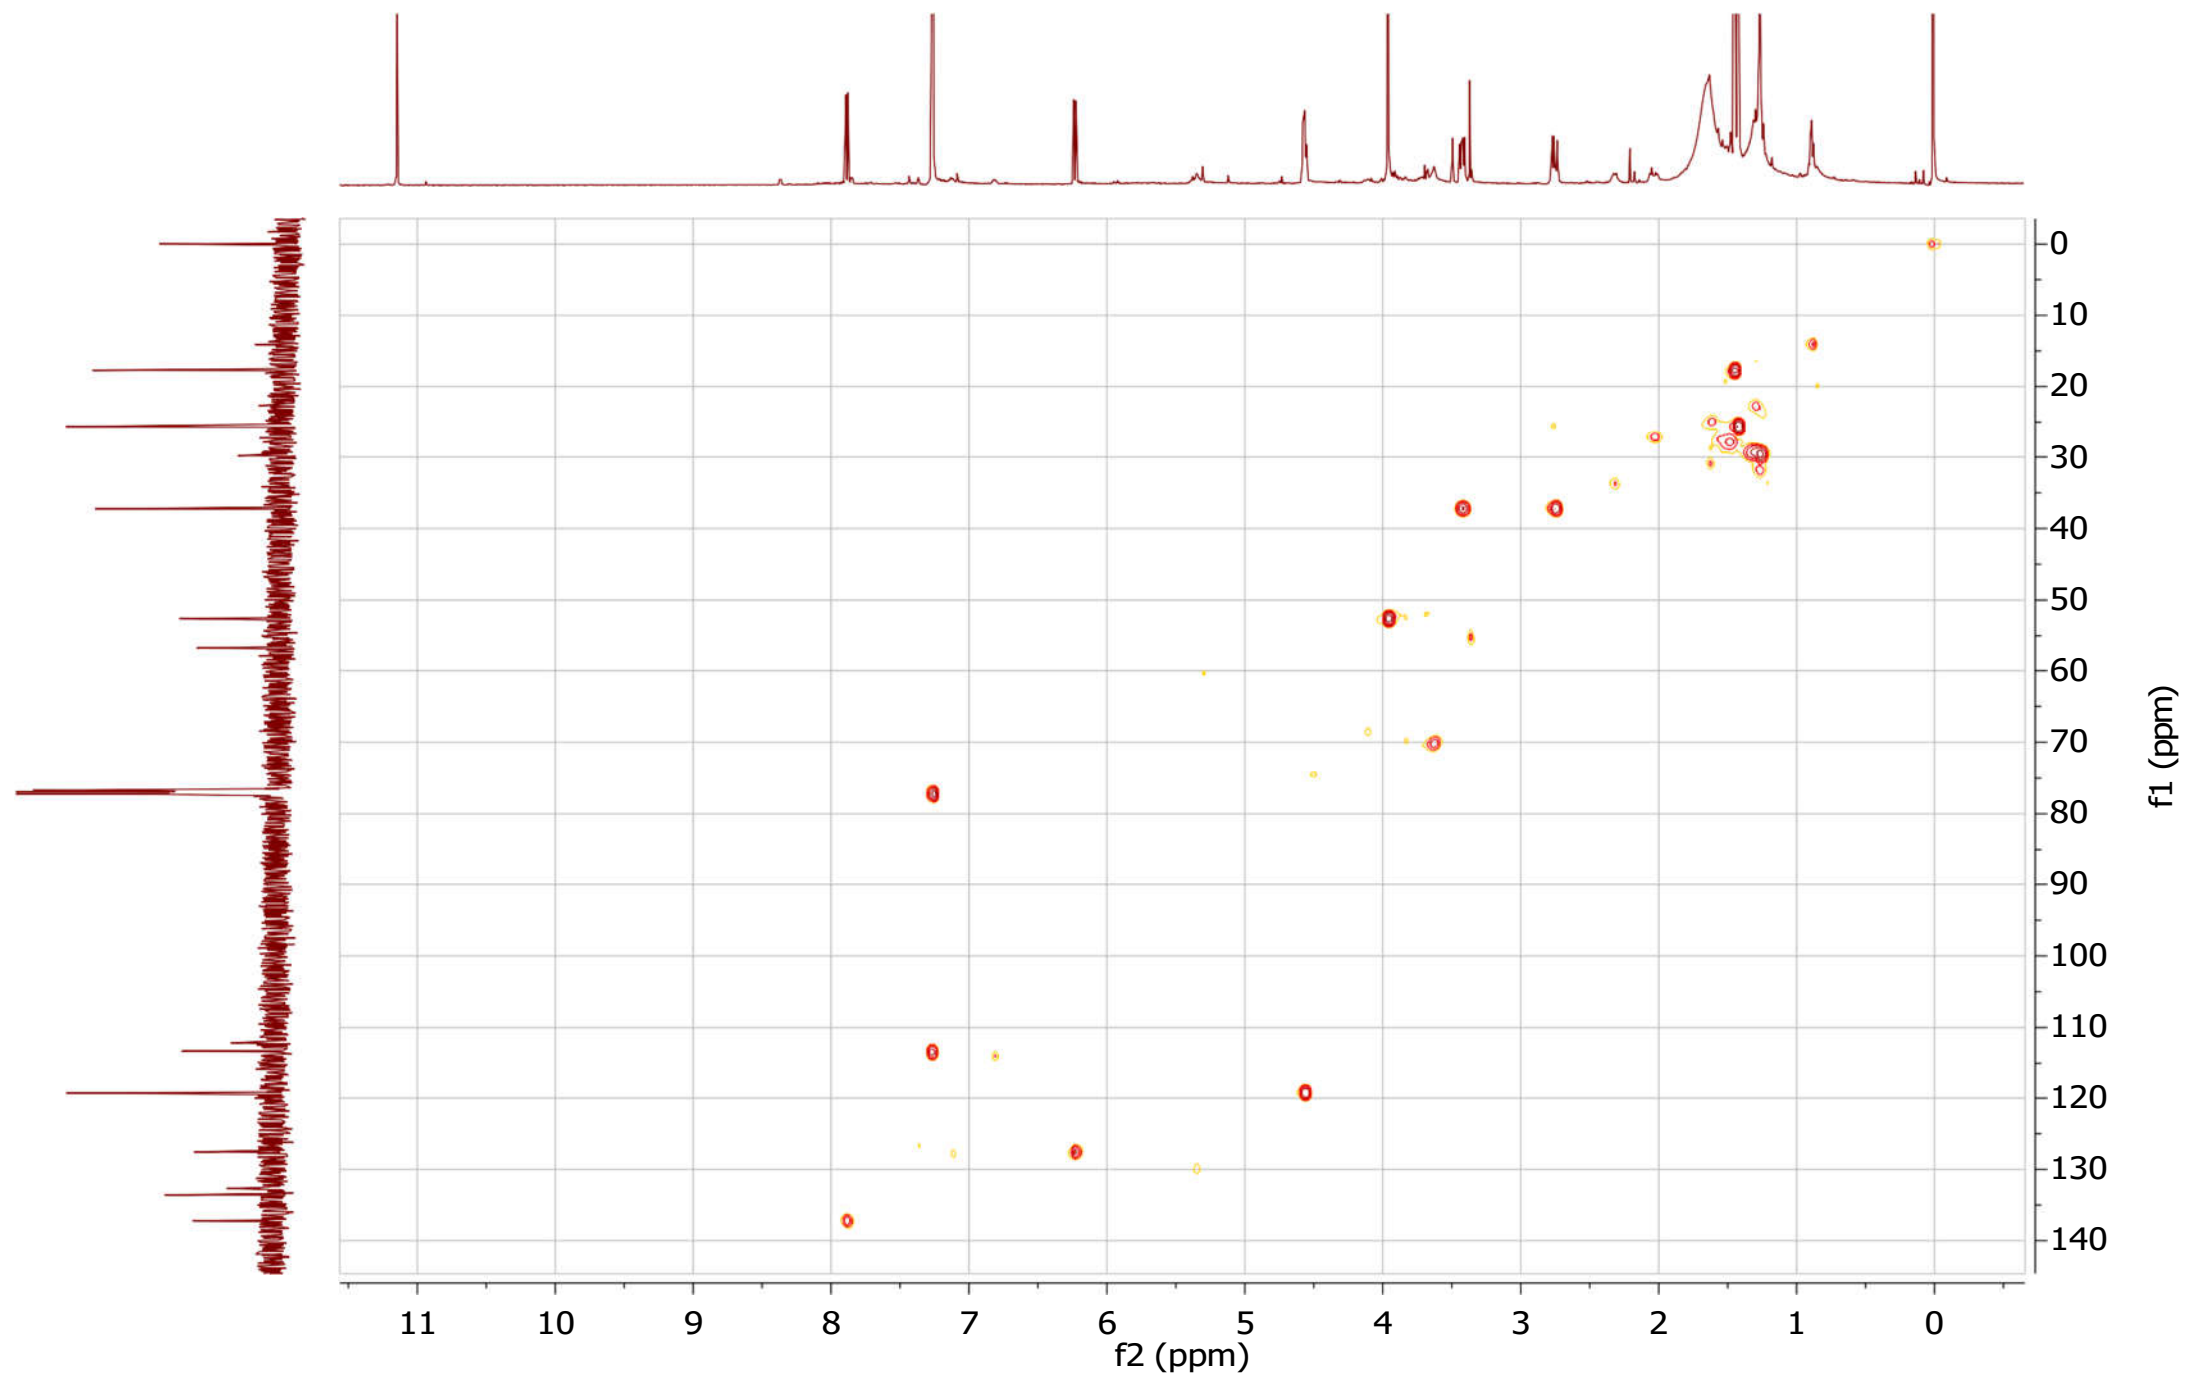

Figure S15.  $^1\text{H}$ - $^{13}\text{C}$  (HSQC) NMR ( $\text{CDCl}_3$ , 600 MHz) of ternifolial (**2**)

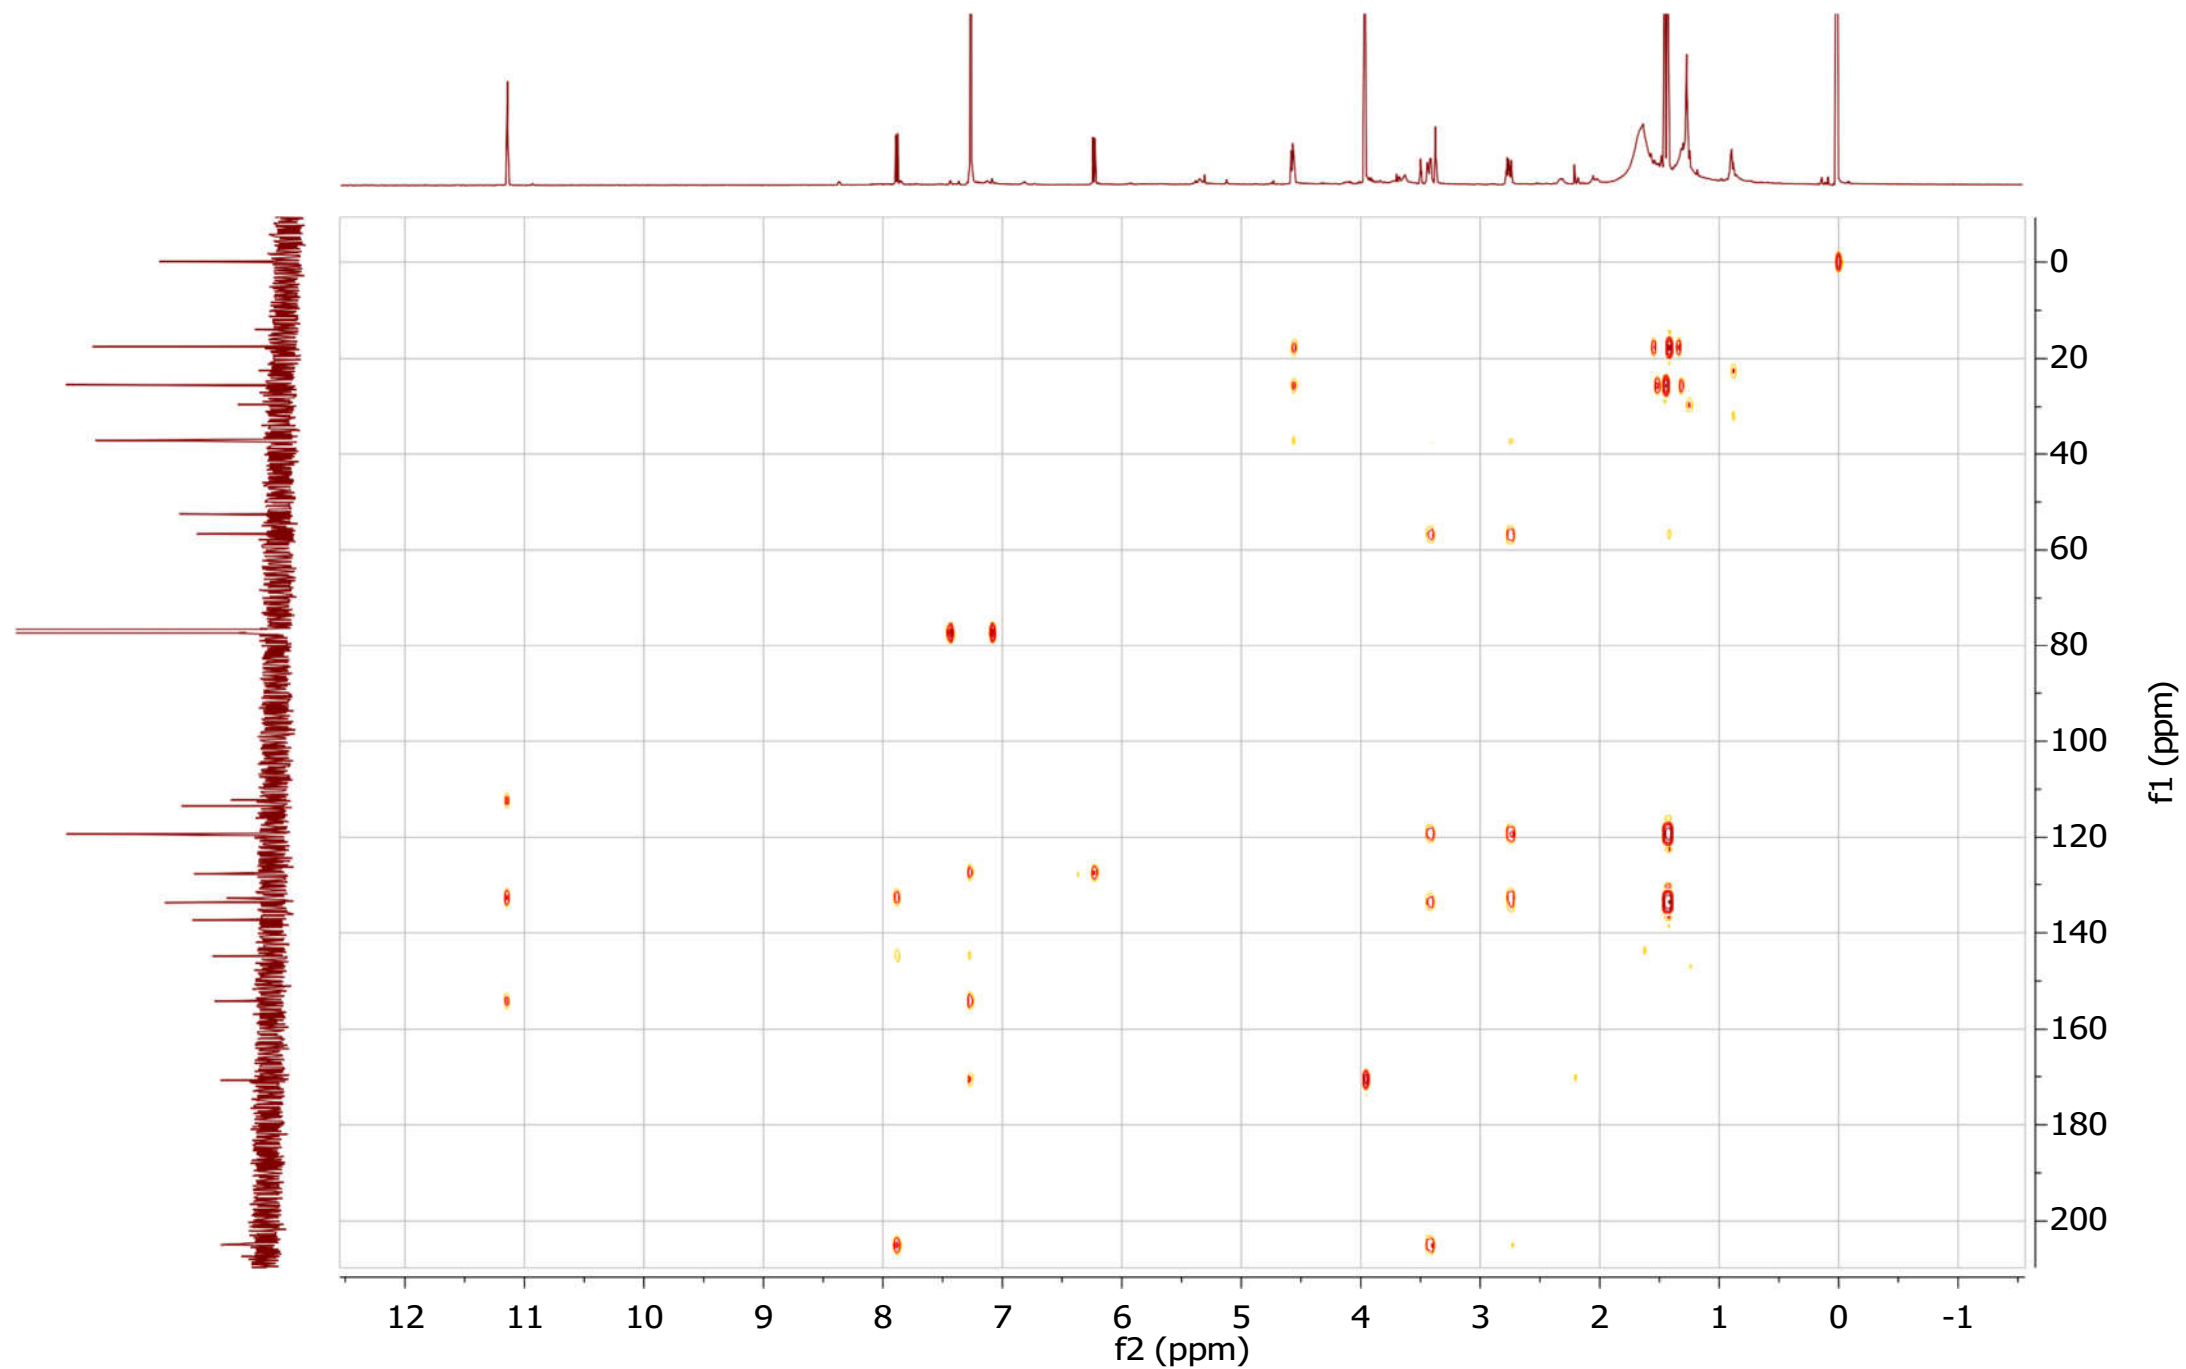

Figure S16.  $^1\text{H}$ - $^{13}\text{C}$  (HMBC) NMR ( $\text{CDCl}_3$ , 600 MHz) of ternifolial (**2**)

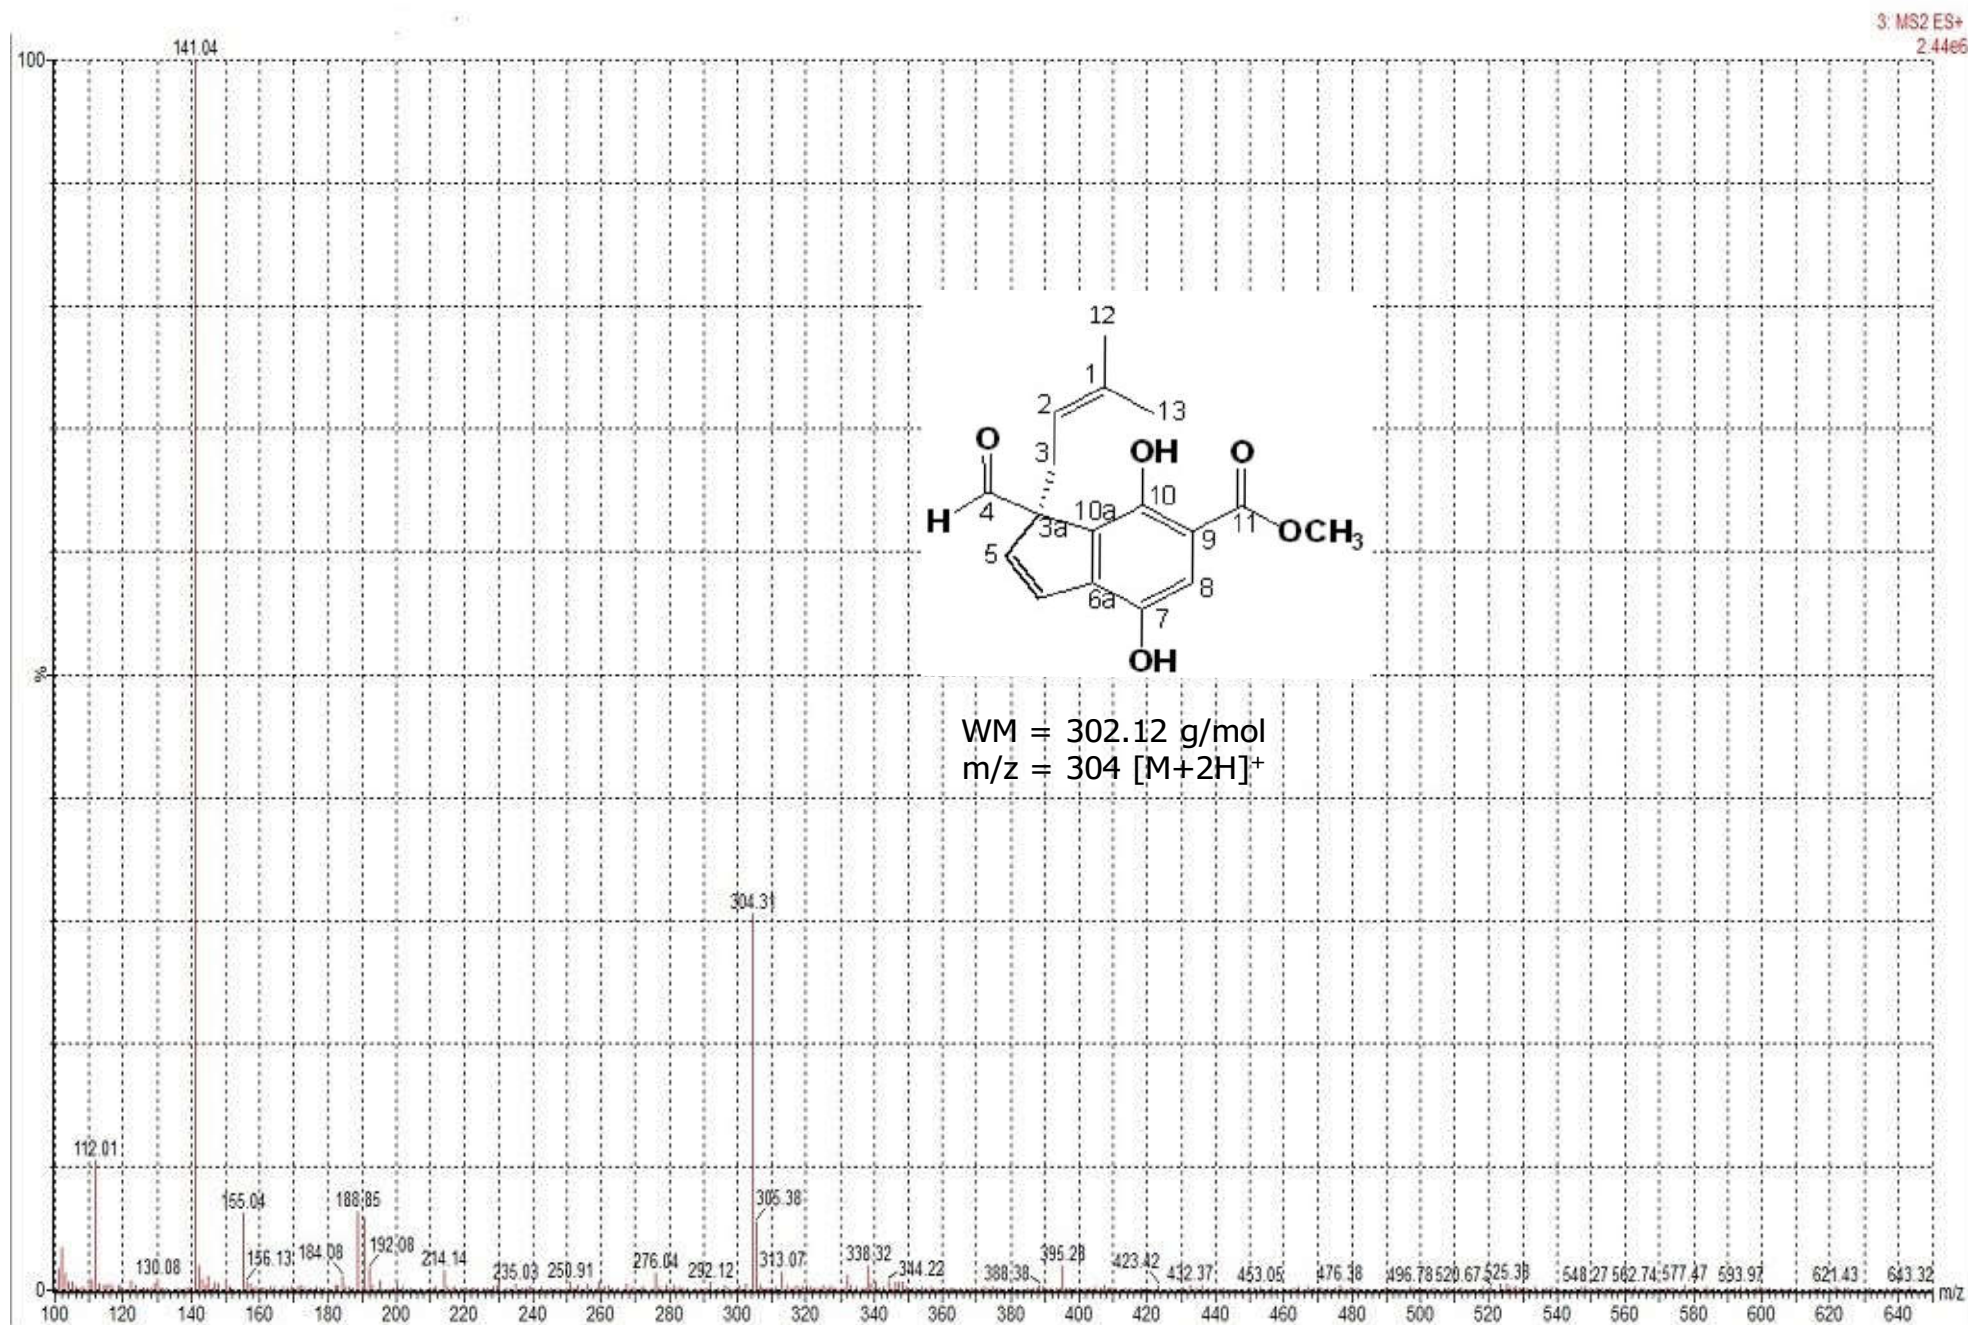

Figure S17. Mass spectrum (MS) of ternifolial (2)

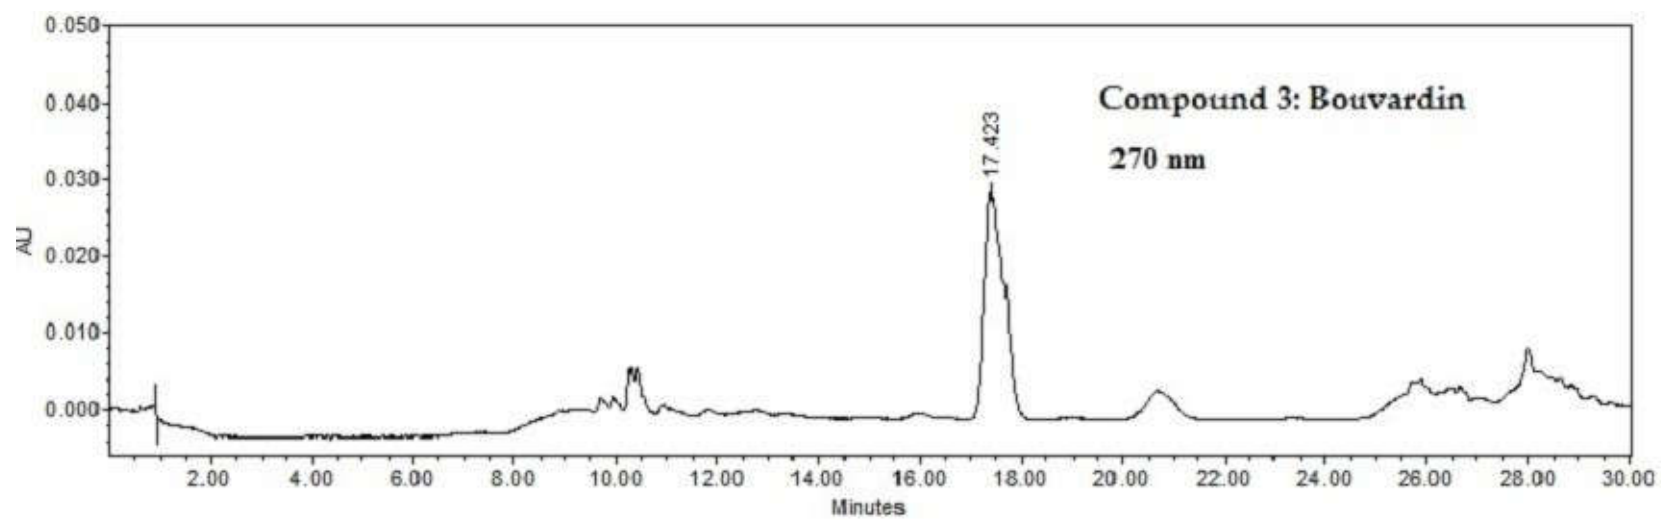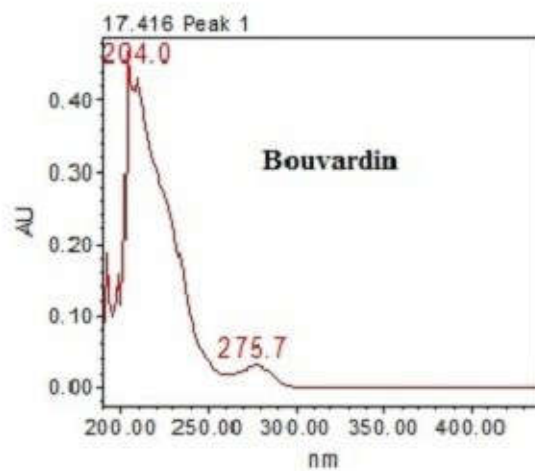

Figure S18. Spectrum UV of bouvardin (**3**)

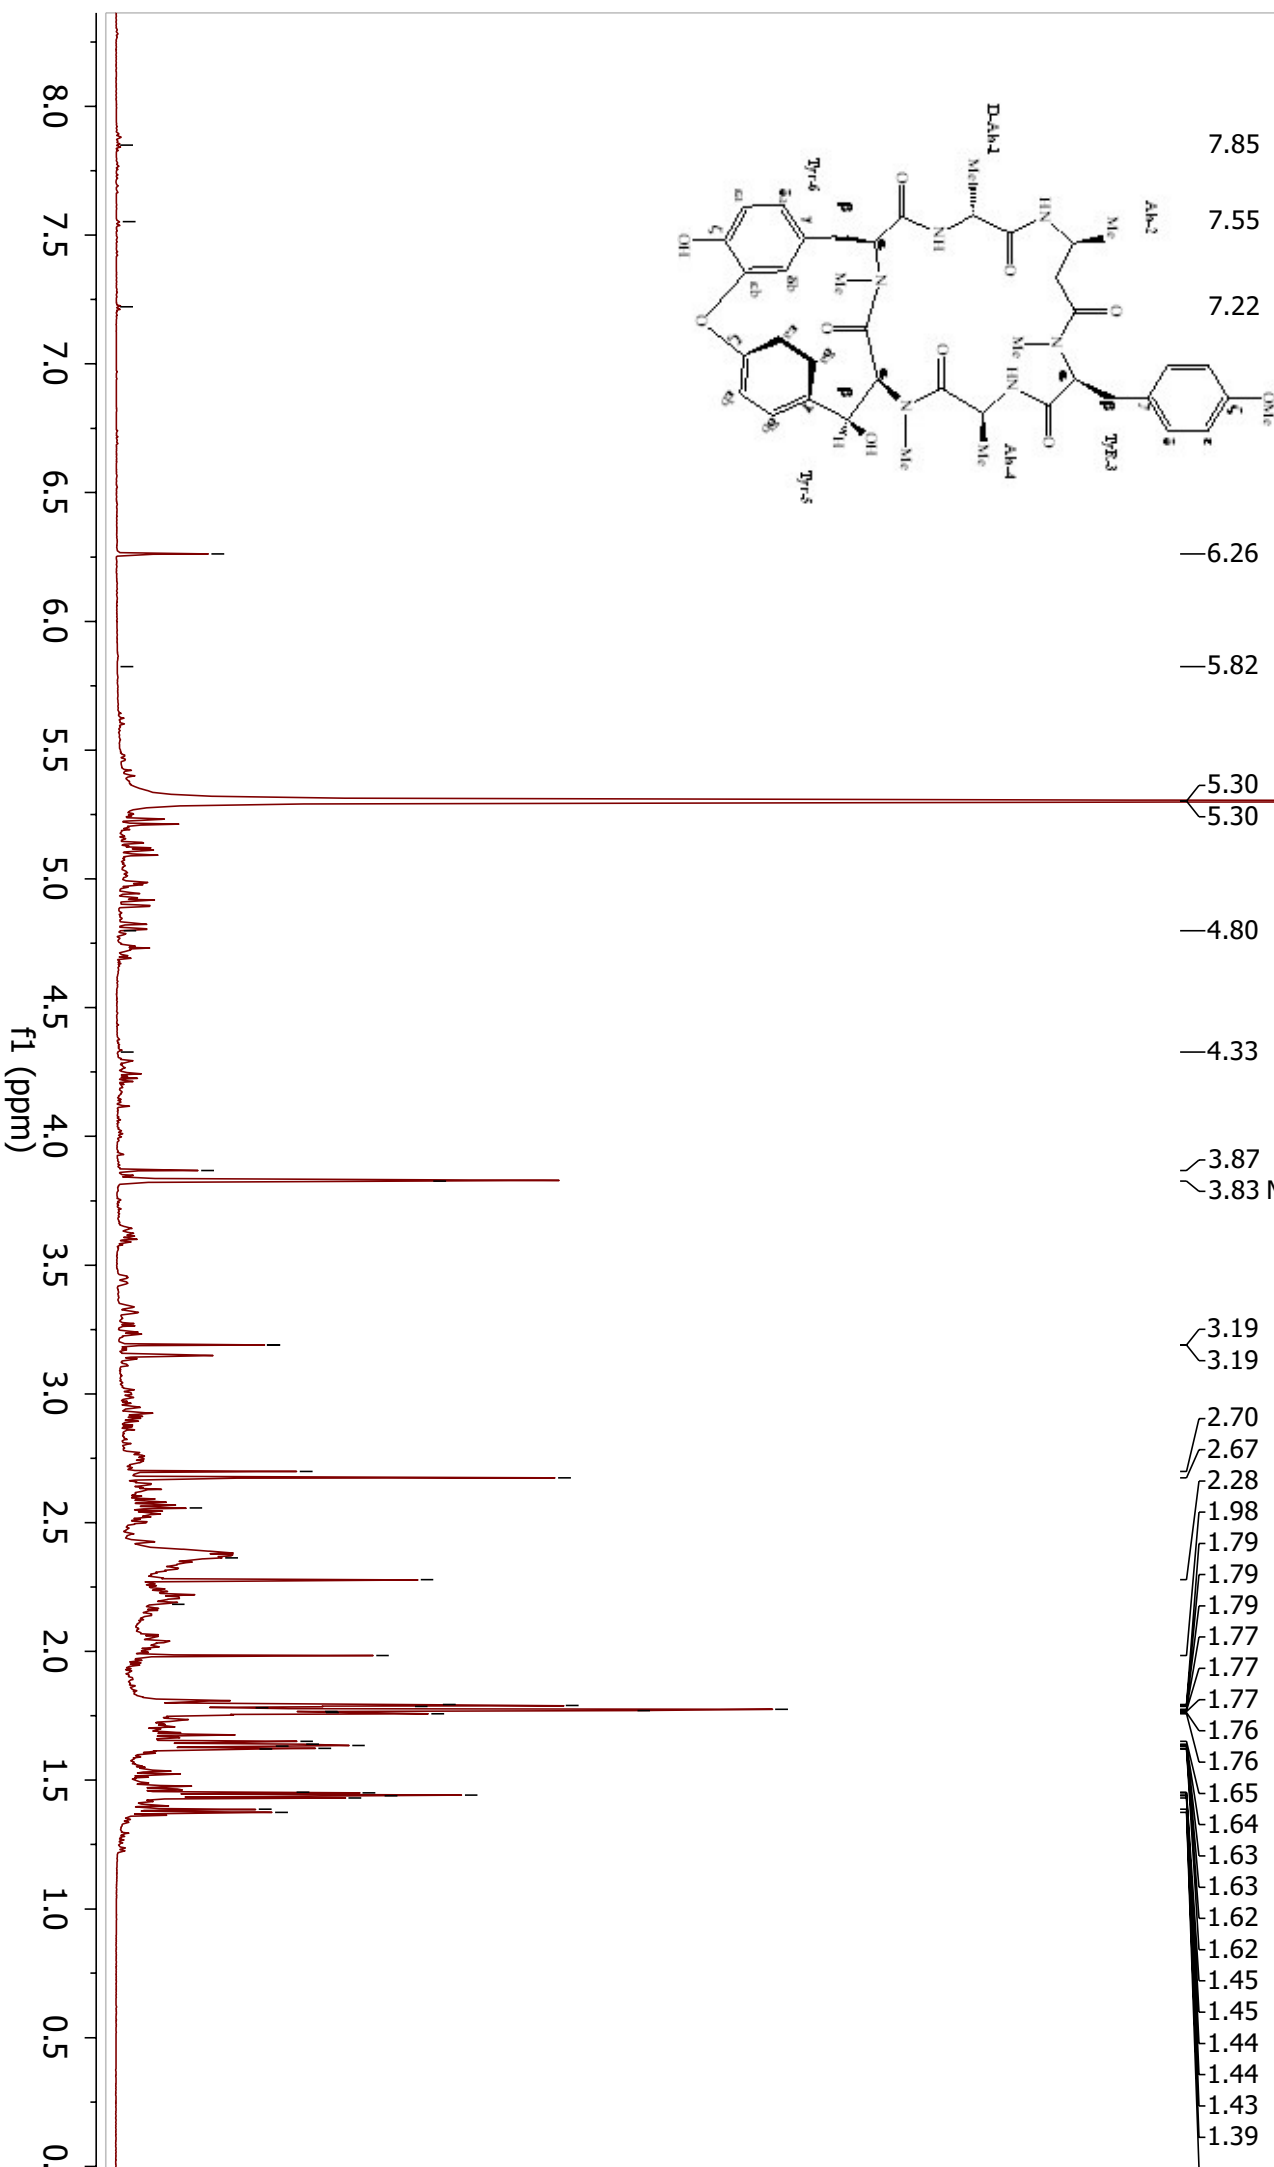Figure S19. <sup>1</sup>H NMR (CD<sub>3</sub>OD, 400 MHz) of bouvardin (3)

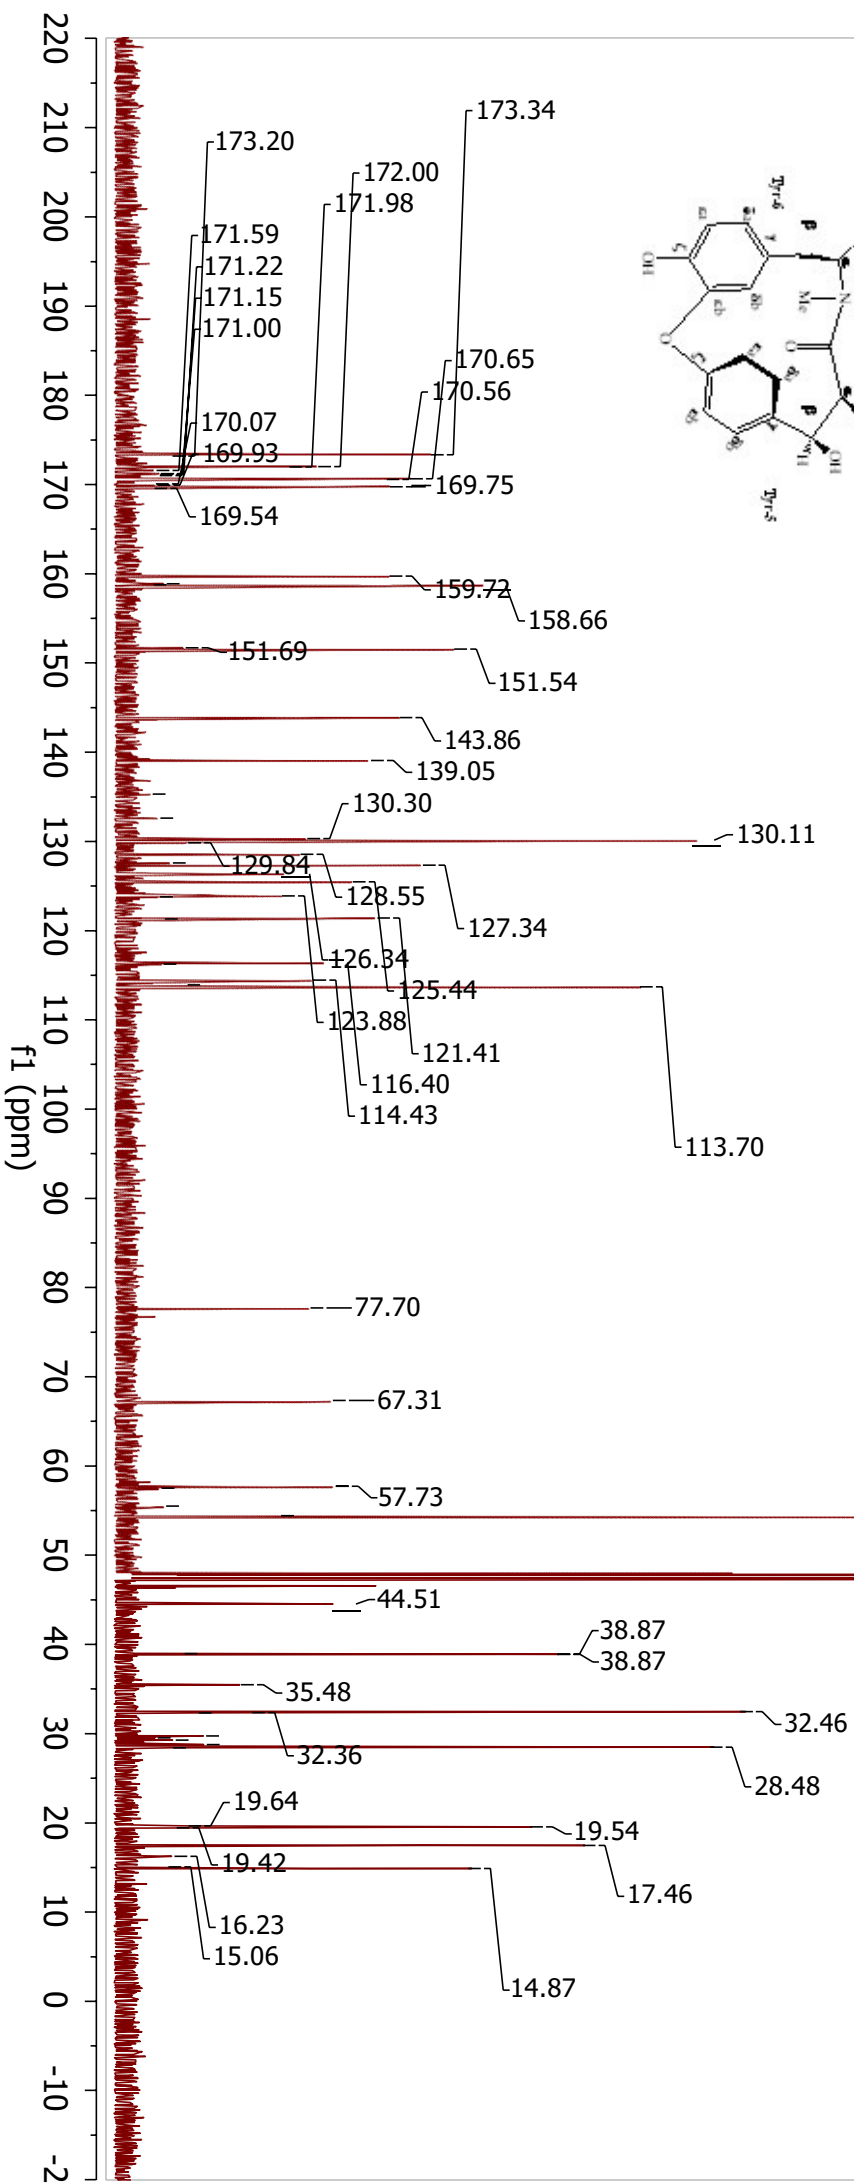

Figure S20.  $^{13}\text{C}$ NMR ( $\text{CD}_3\text{OD}$ , 100 MHz) of bouvardin (**3**)

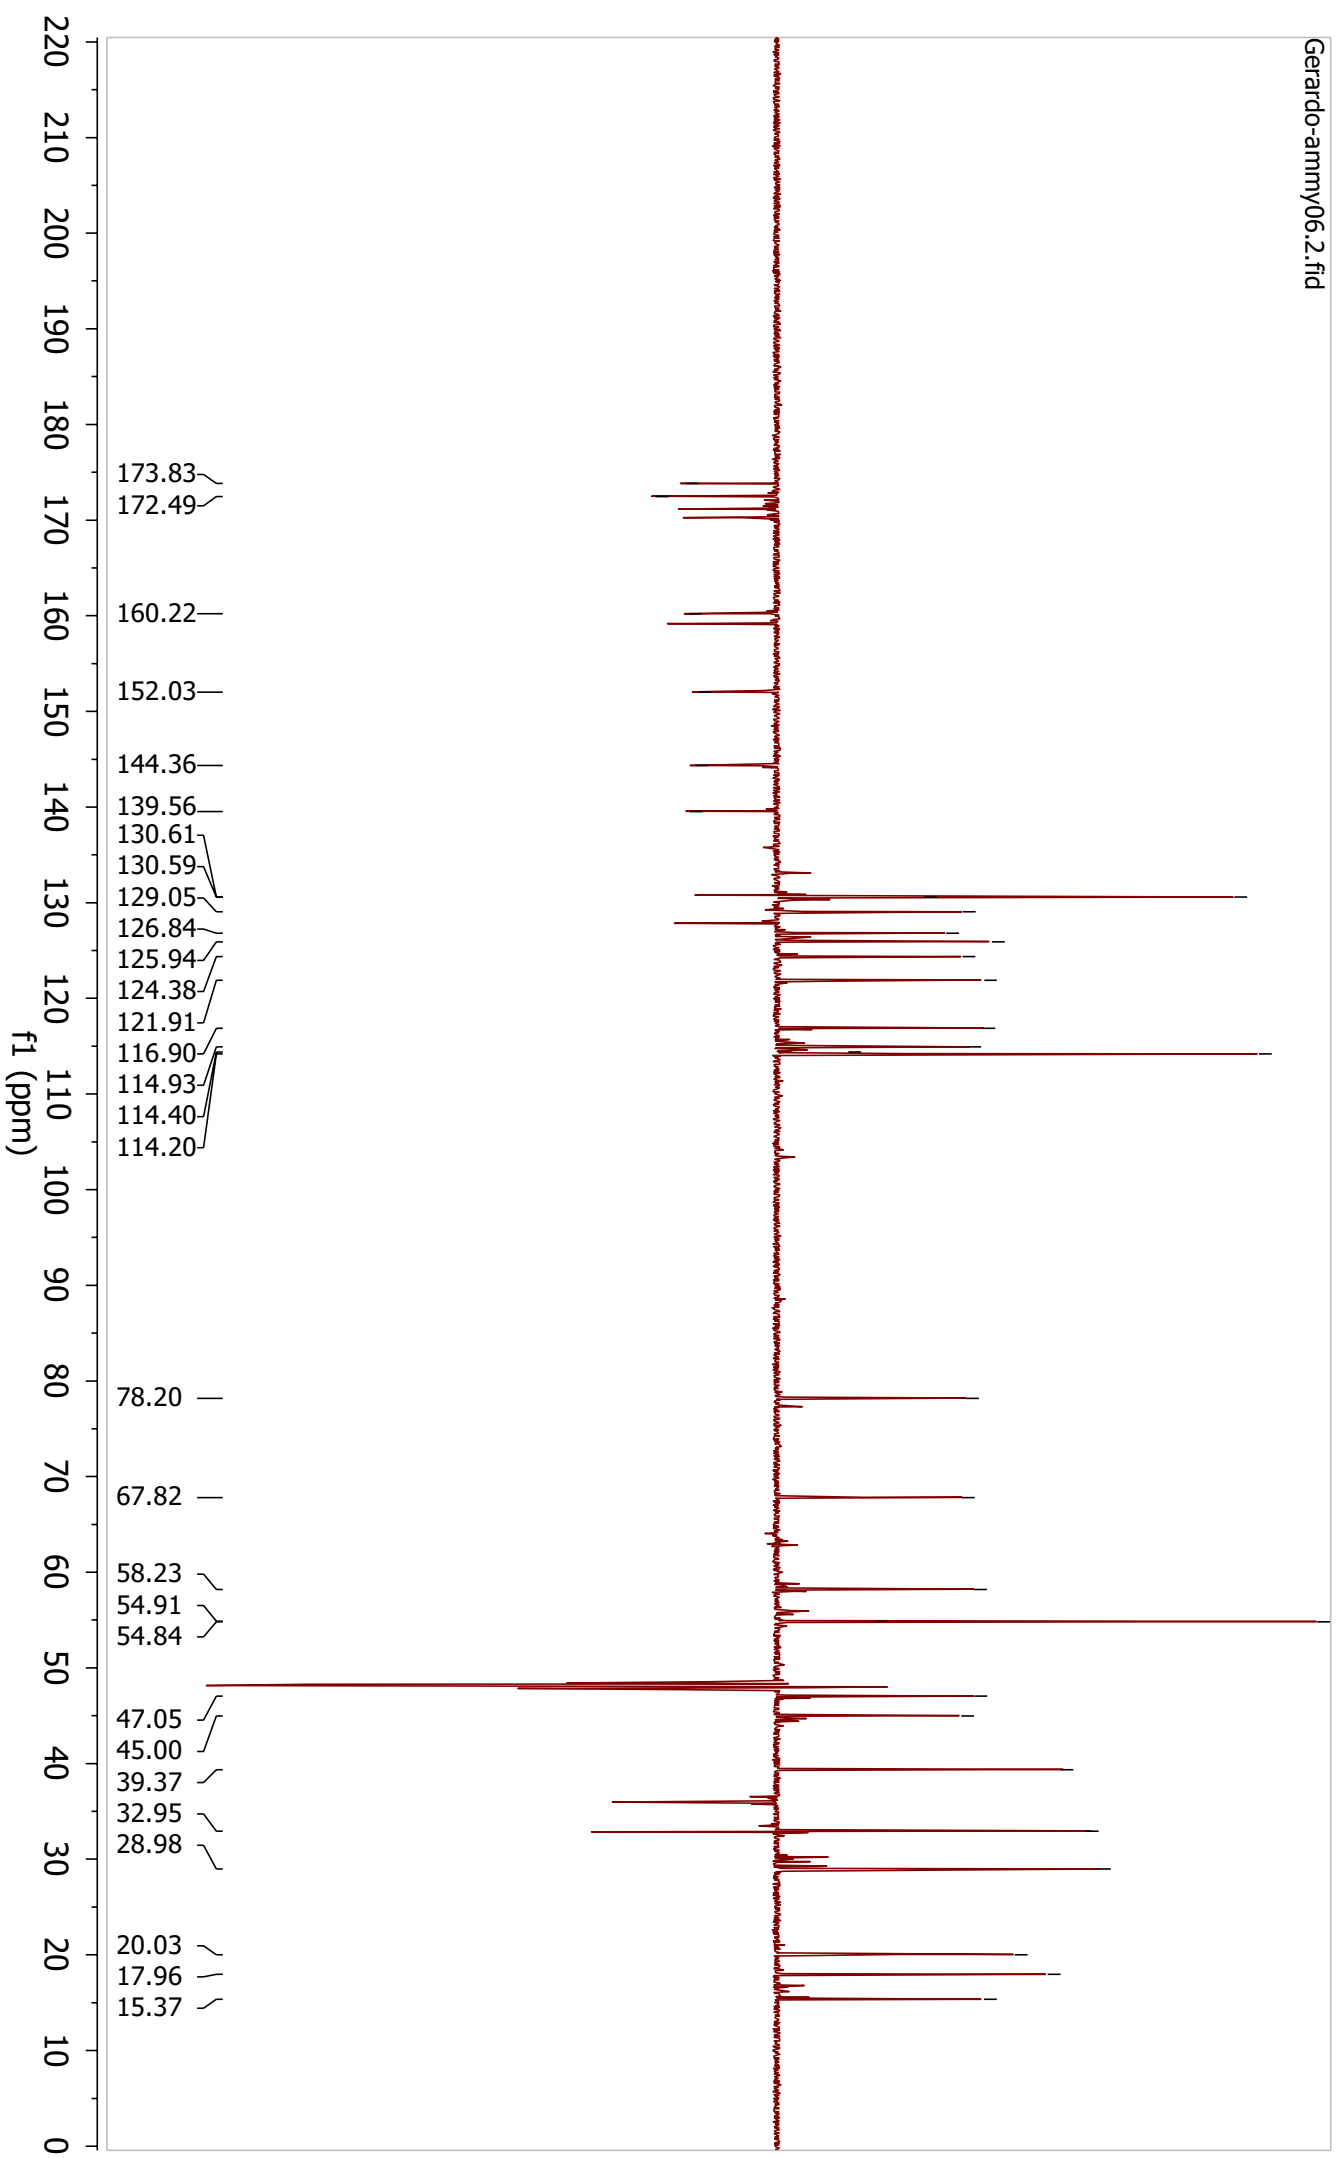Figure S21.  $^{13}\text{C}$  (DEPT) NMR ( $\text{CD}_3\text{OD}$ , 100 MHz) of bouvardin (**3**)



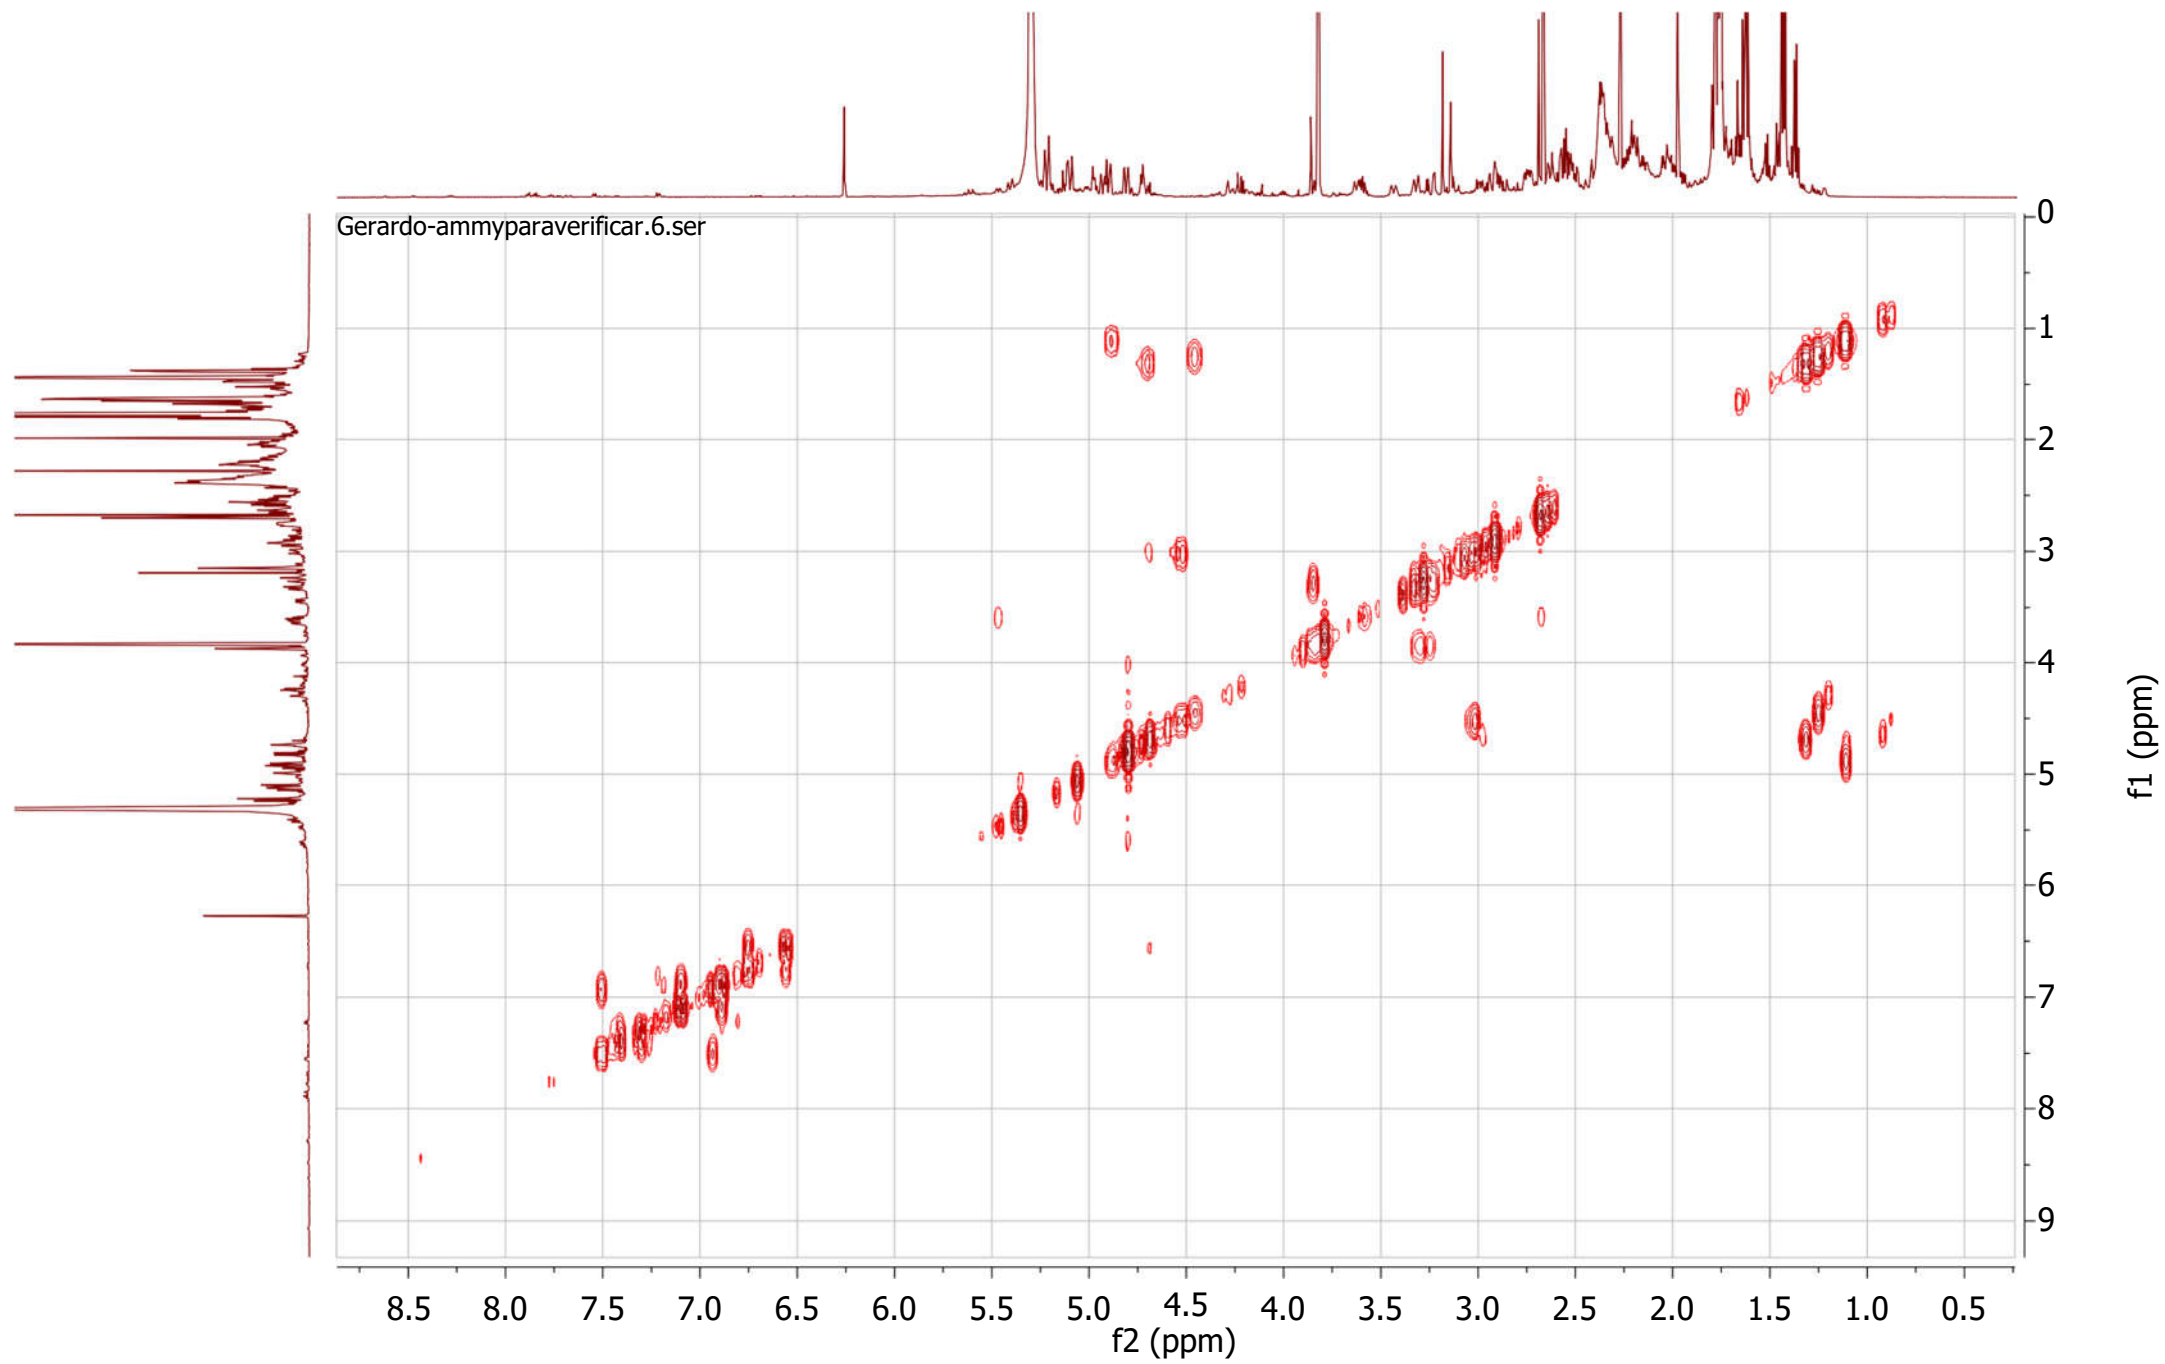

Figure S22.  $^1\text{H}$ - $^1\text{H}$  COSY NMR ( $\text{CD}_3\text{OD}$ , 400 MHz) of bouvardin (**3**)



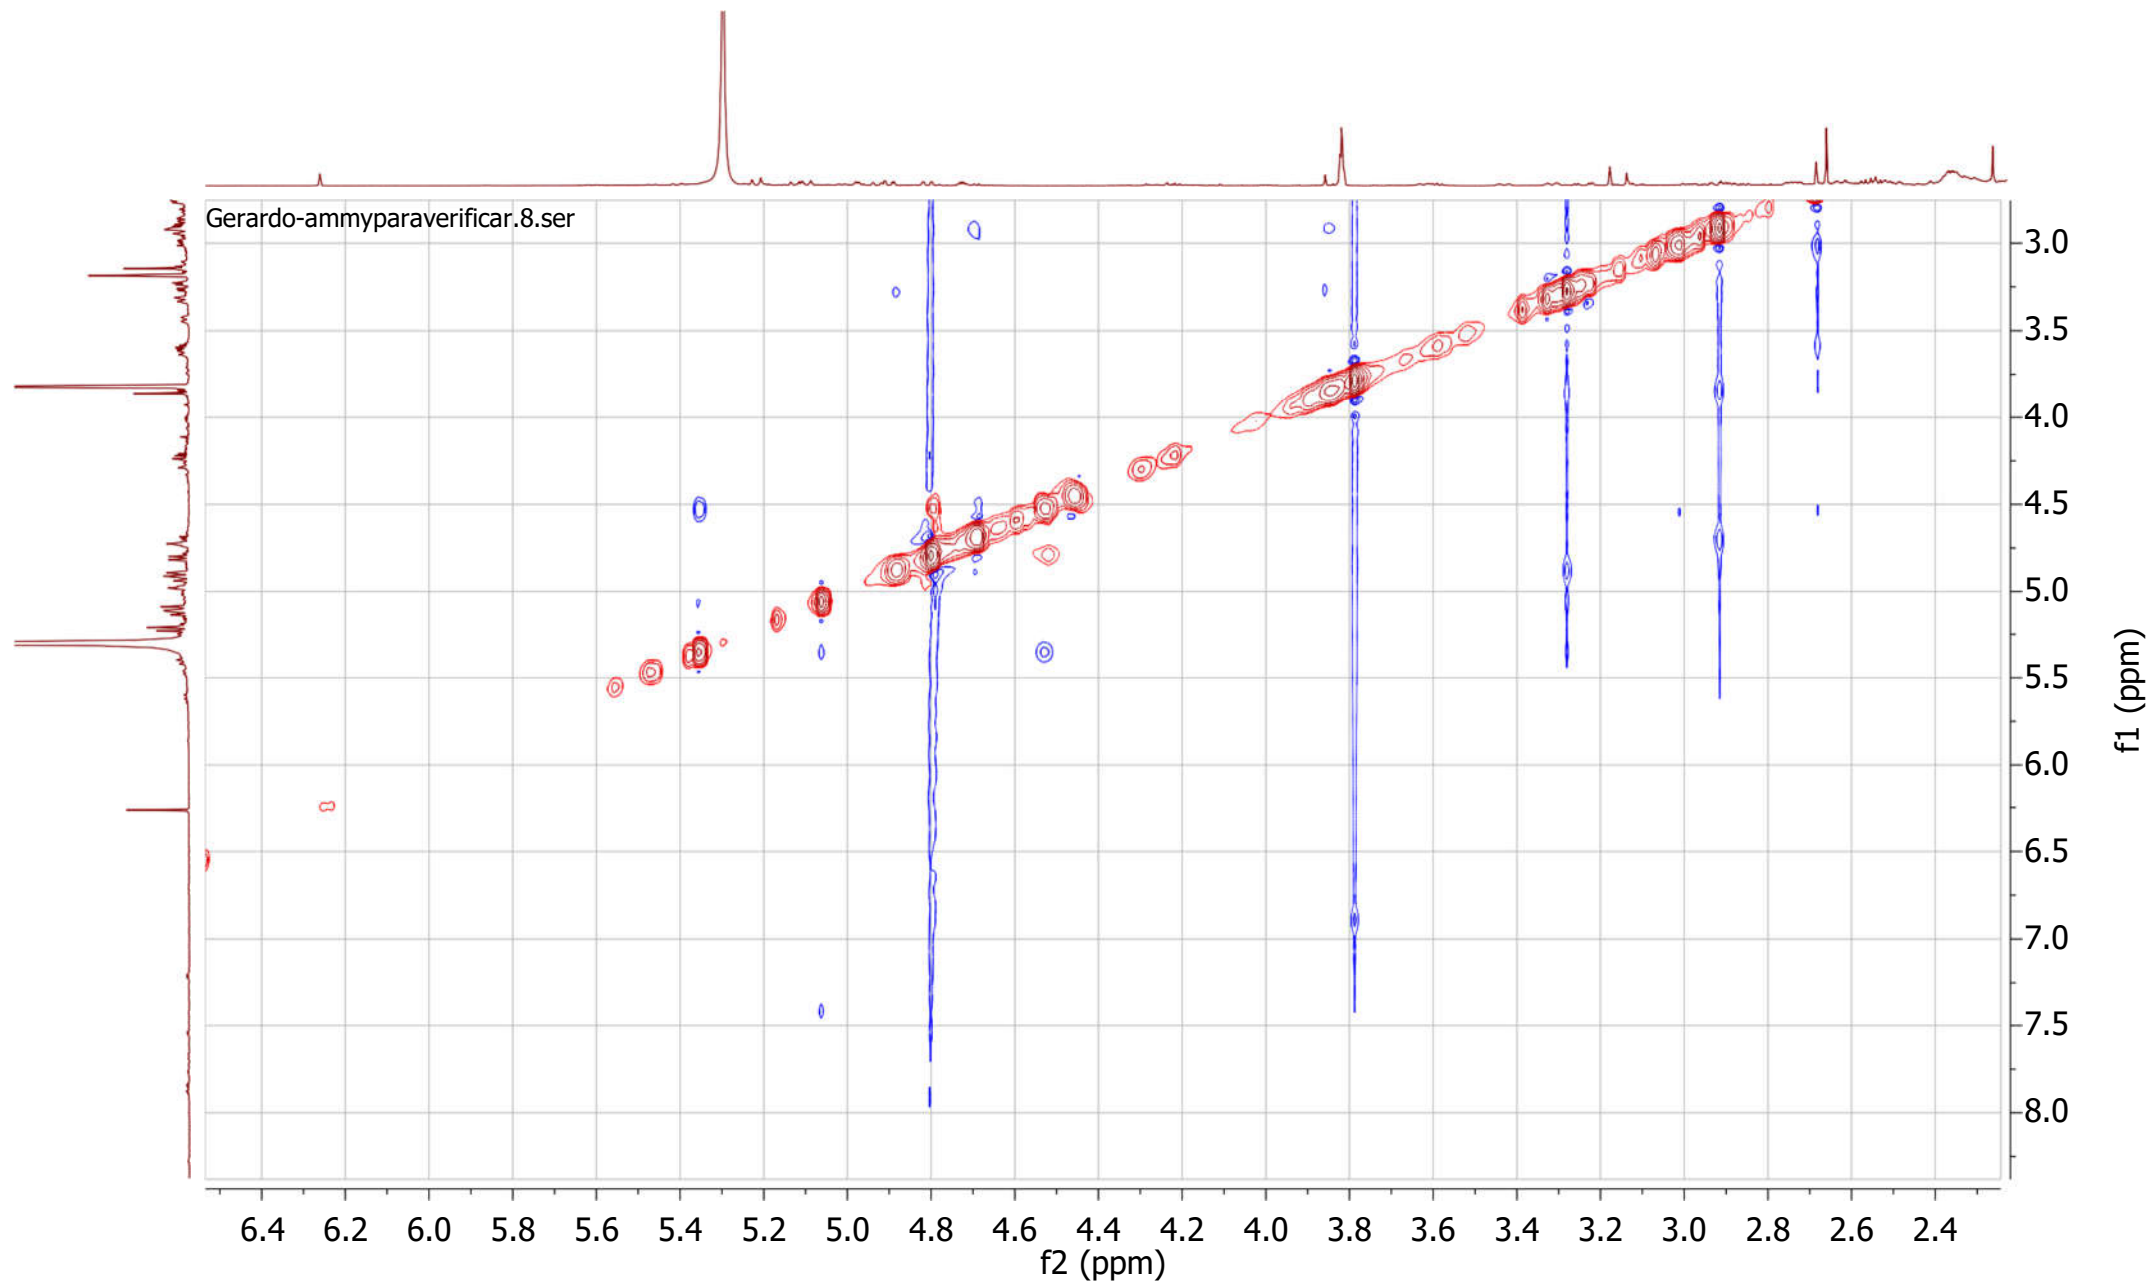

Figure S23.  $^1\text{H}$ - $^1\text{H}$  NOESY NMR ( $\text{CD}_3\text{OD}$ , 400 MHz) of bouvardin (**3**)

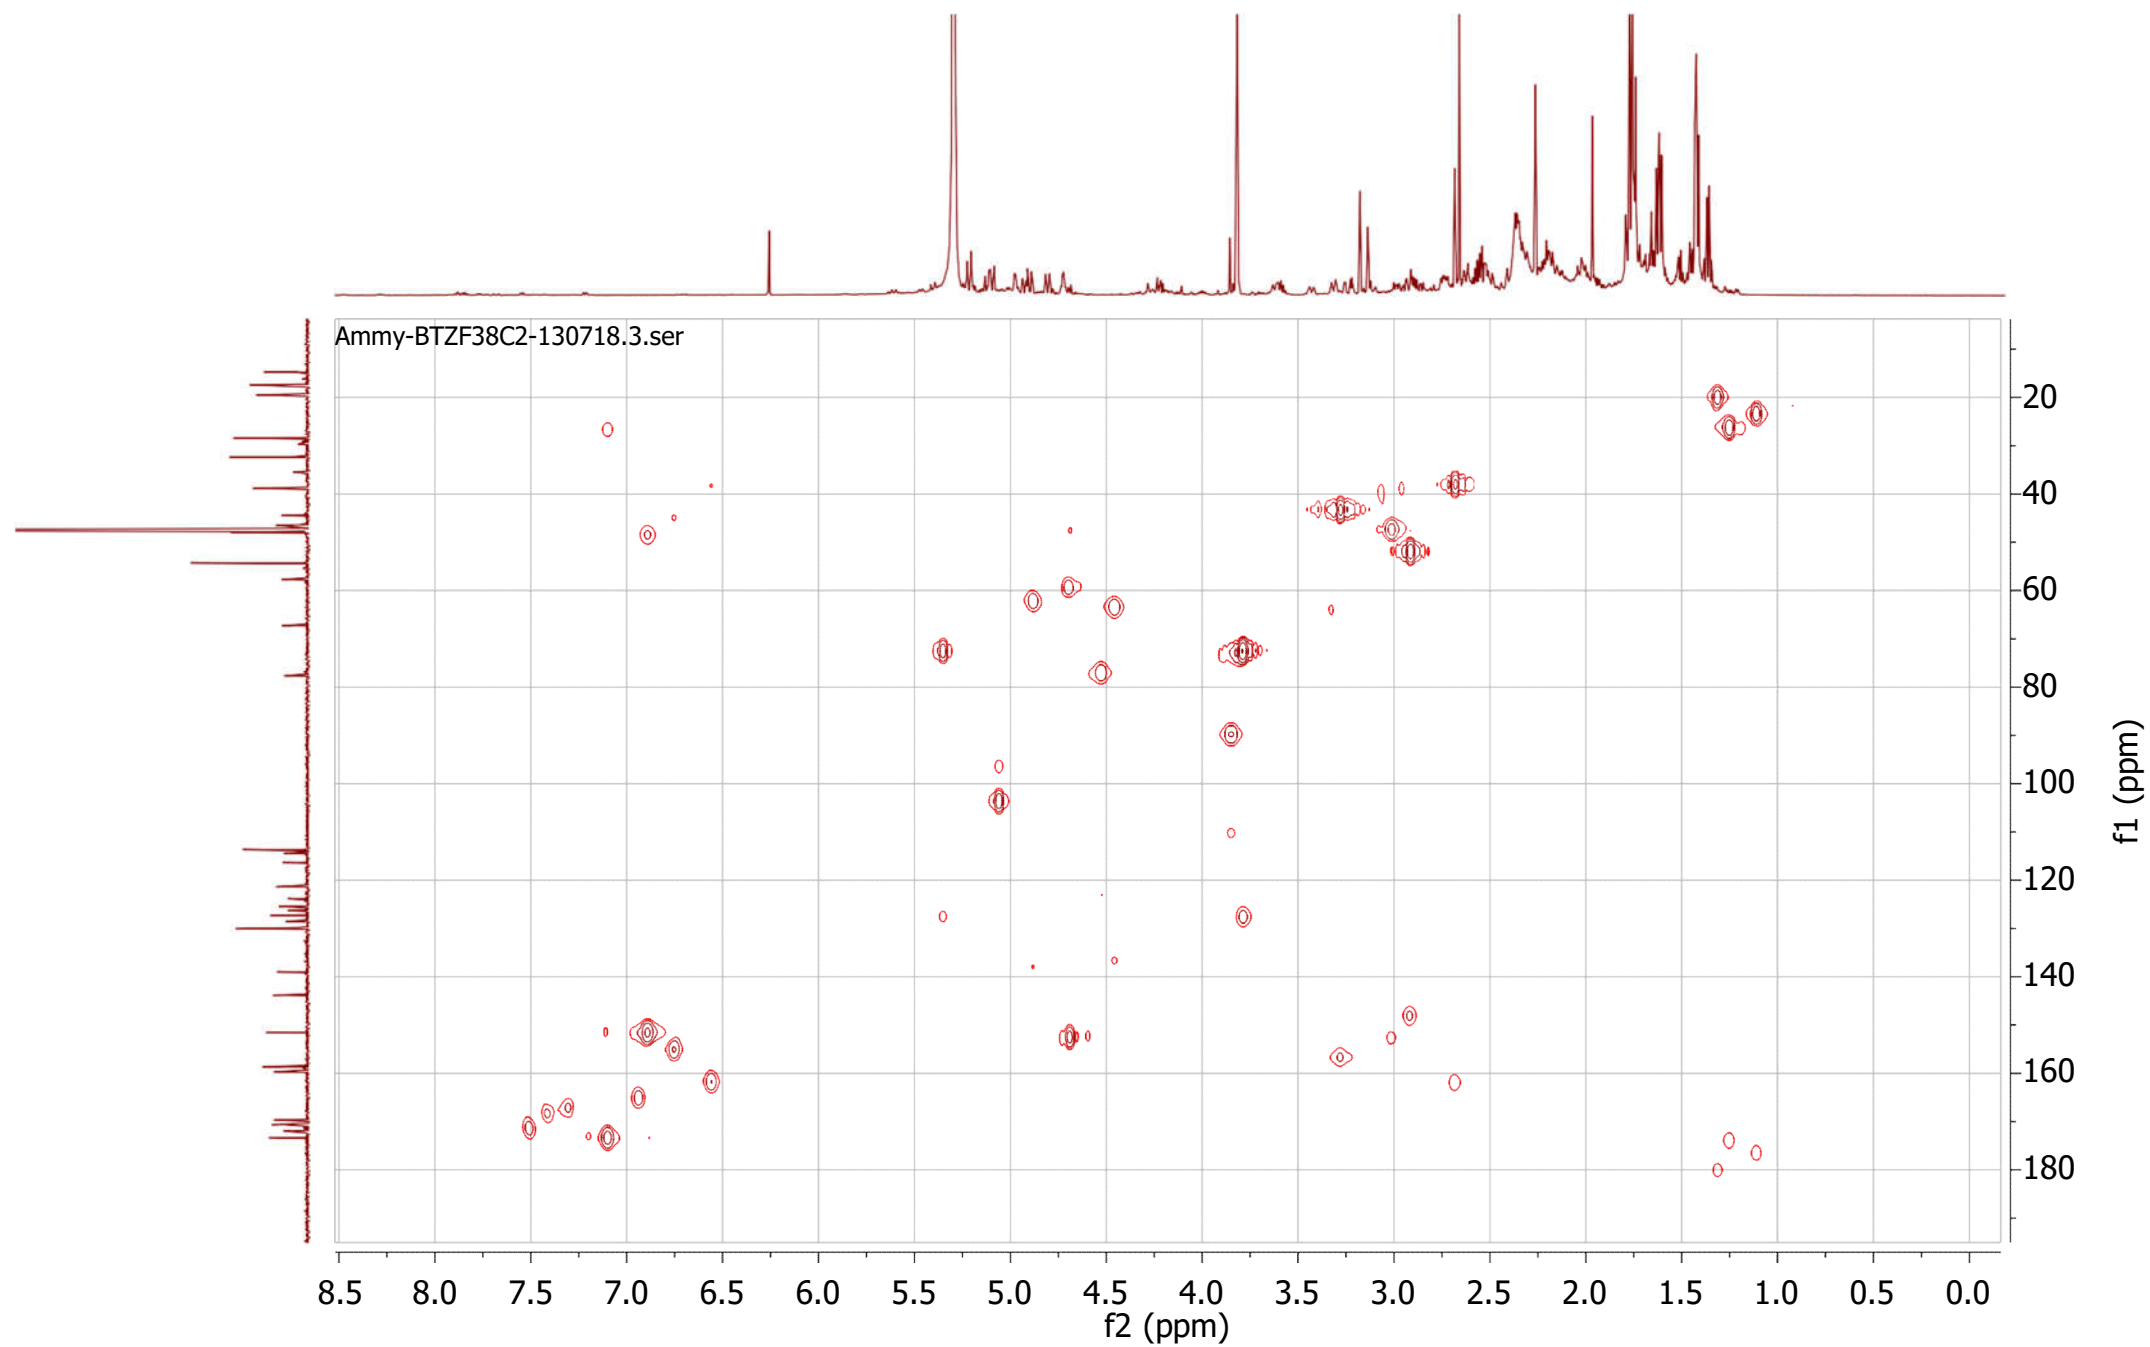

Figure S24.  $^1\text{H}$ - $^{13}\text{C}$  (HMBC) NMR ( $\text{CD}_3\text{OD}$ ), 400 MHz) of bouvardin (**3**)

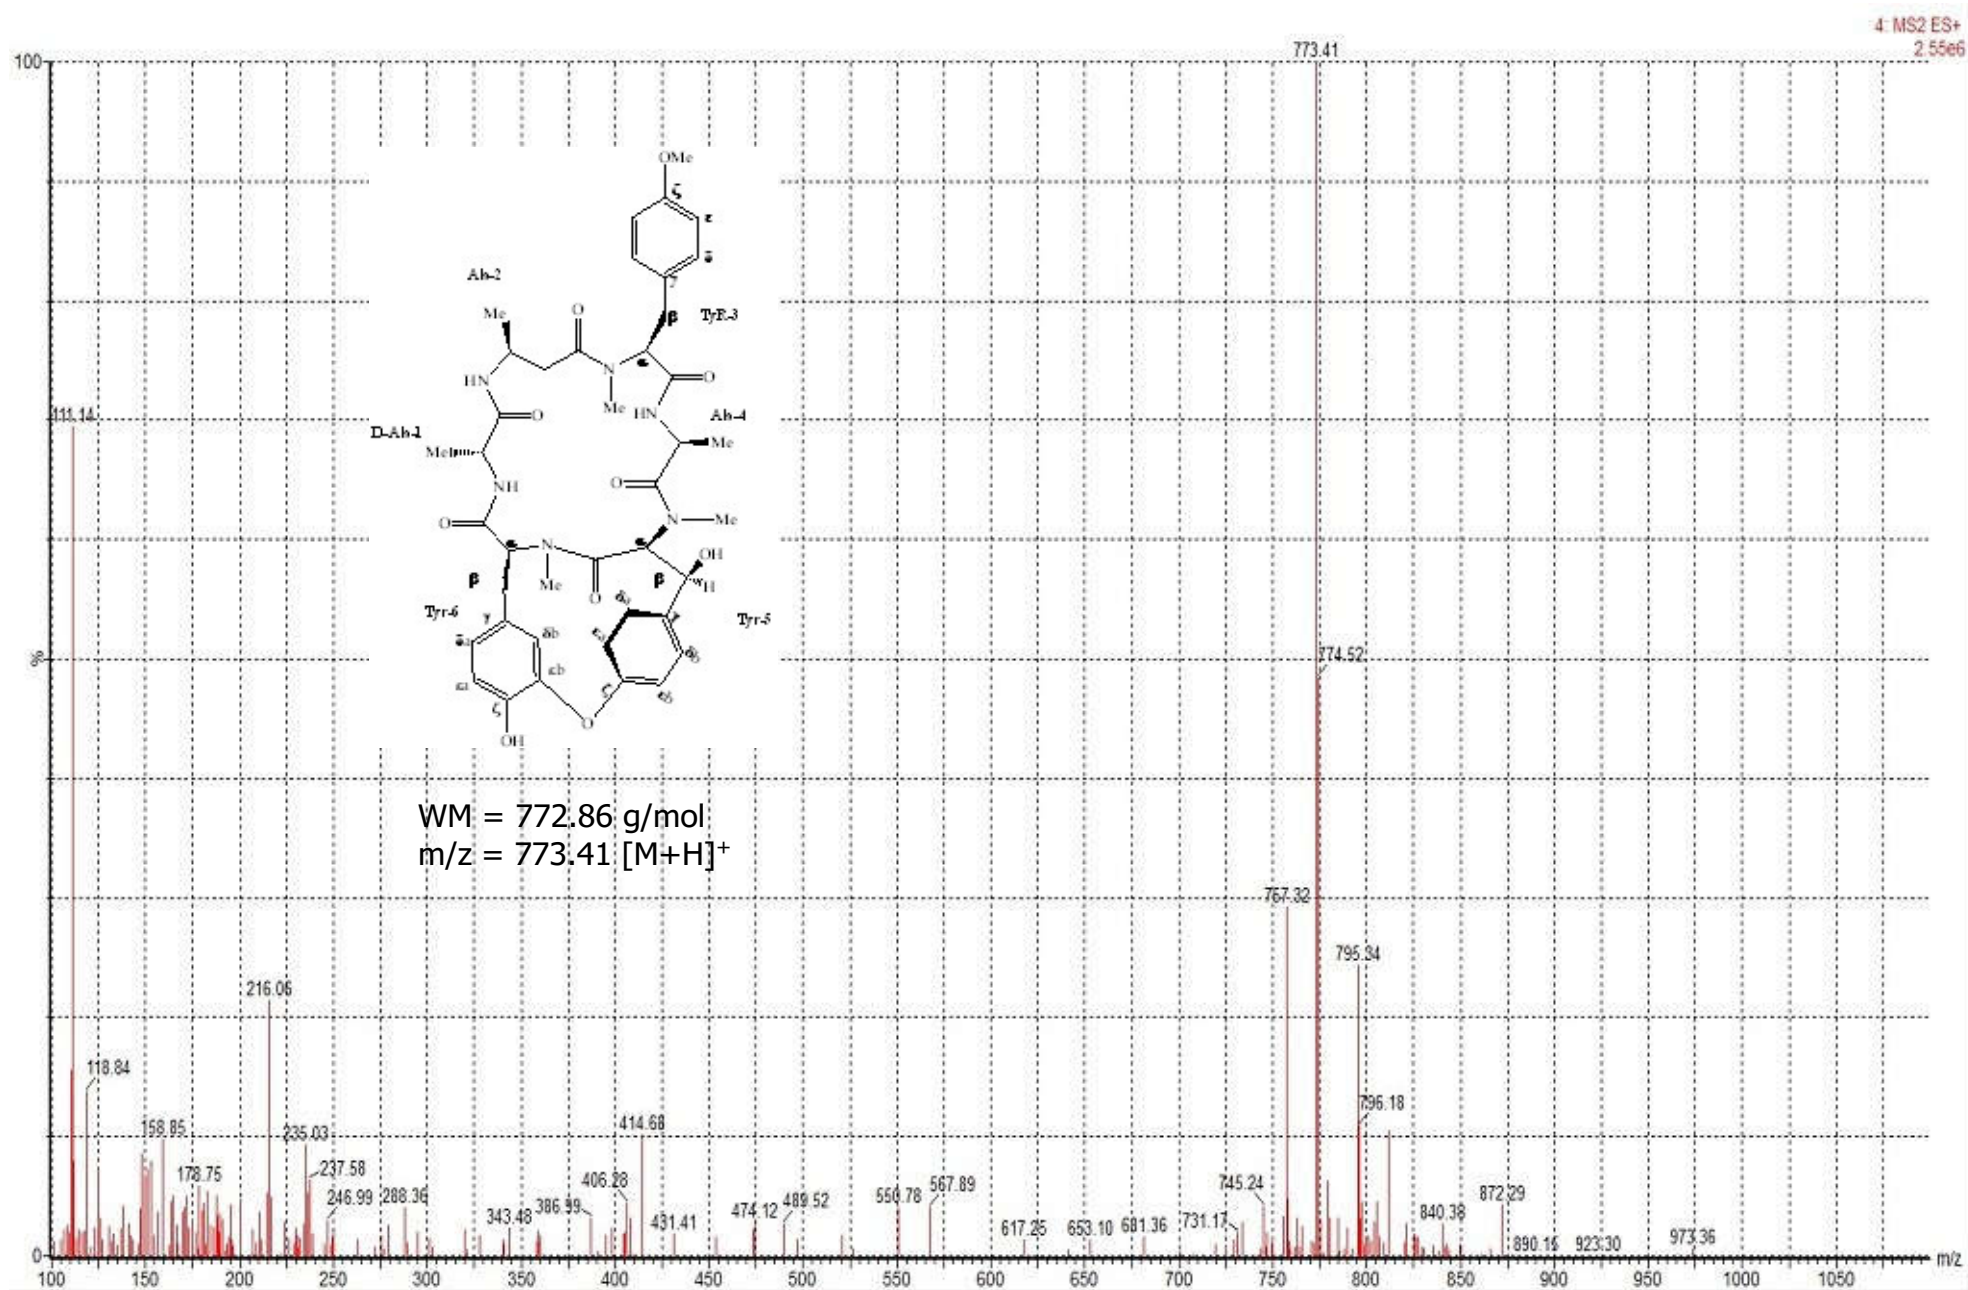

Figure S25. Mass spectrum (MS) of bouvardin (**3**)

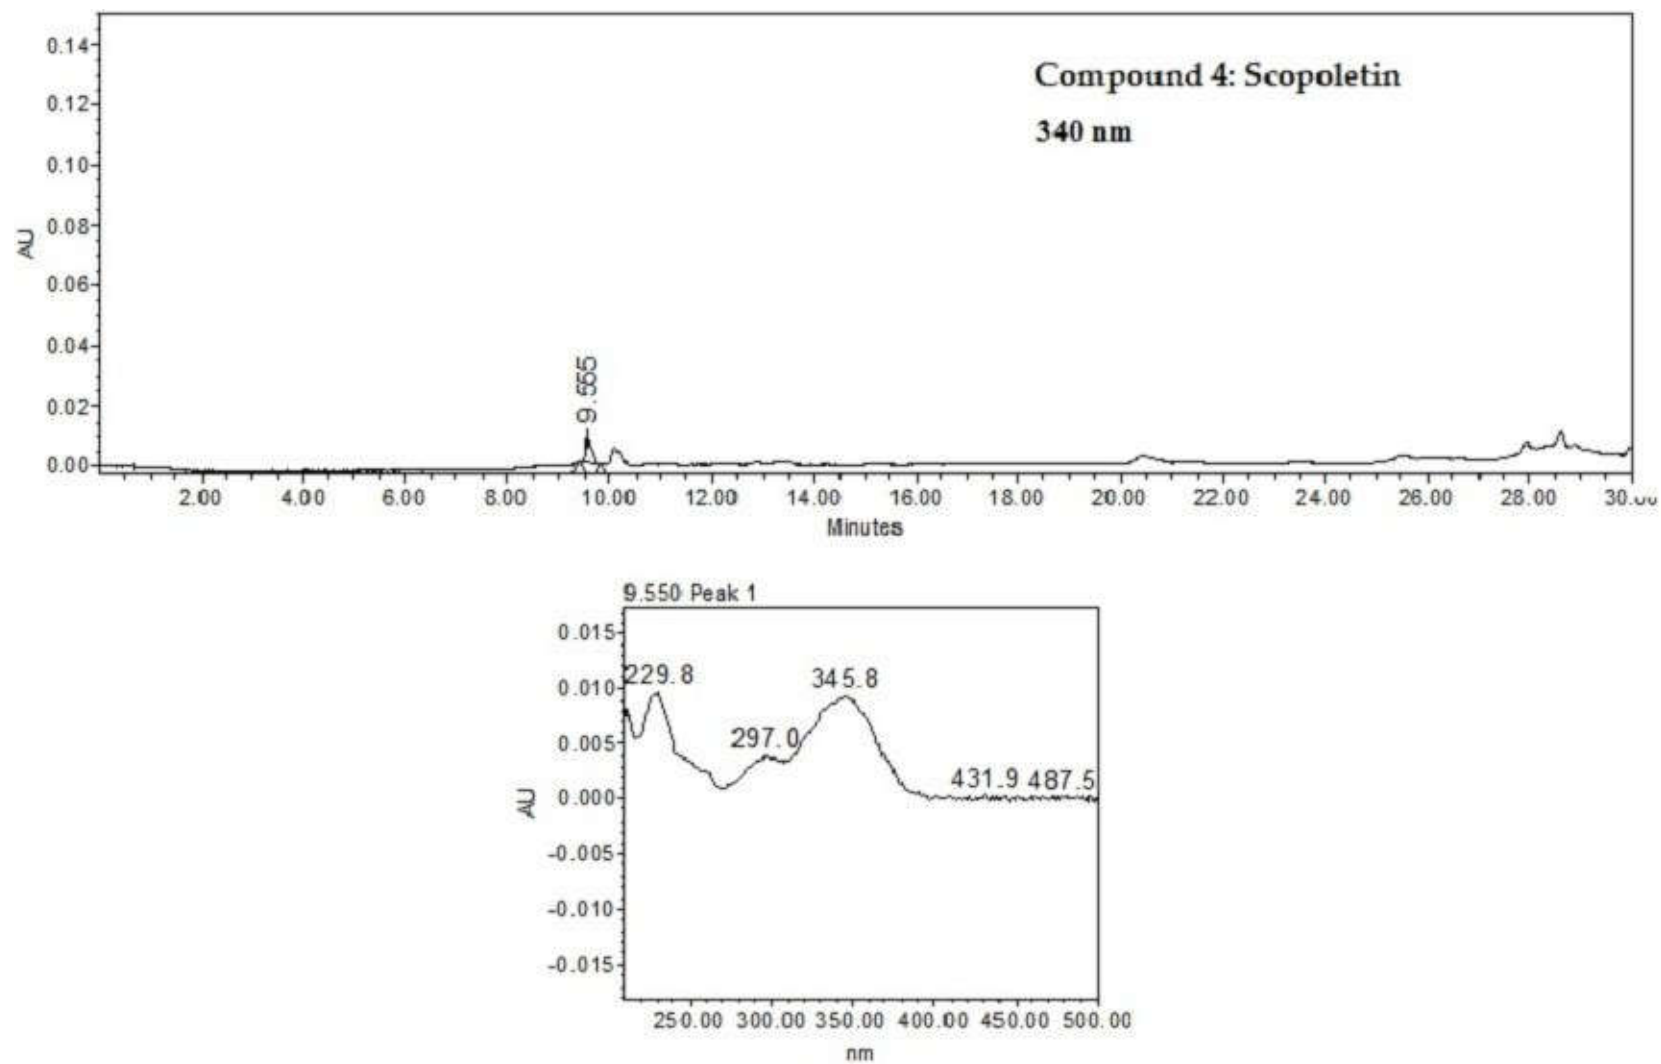

Fig S26. Spectrum UV of Scopoletin (**4**)

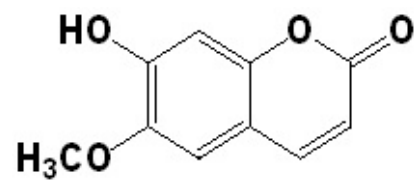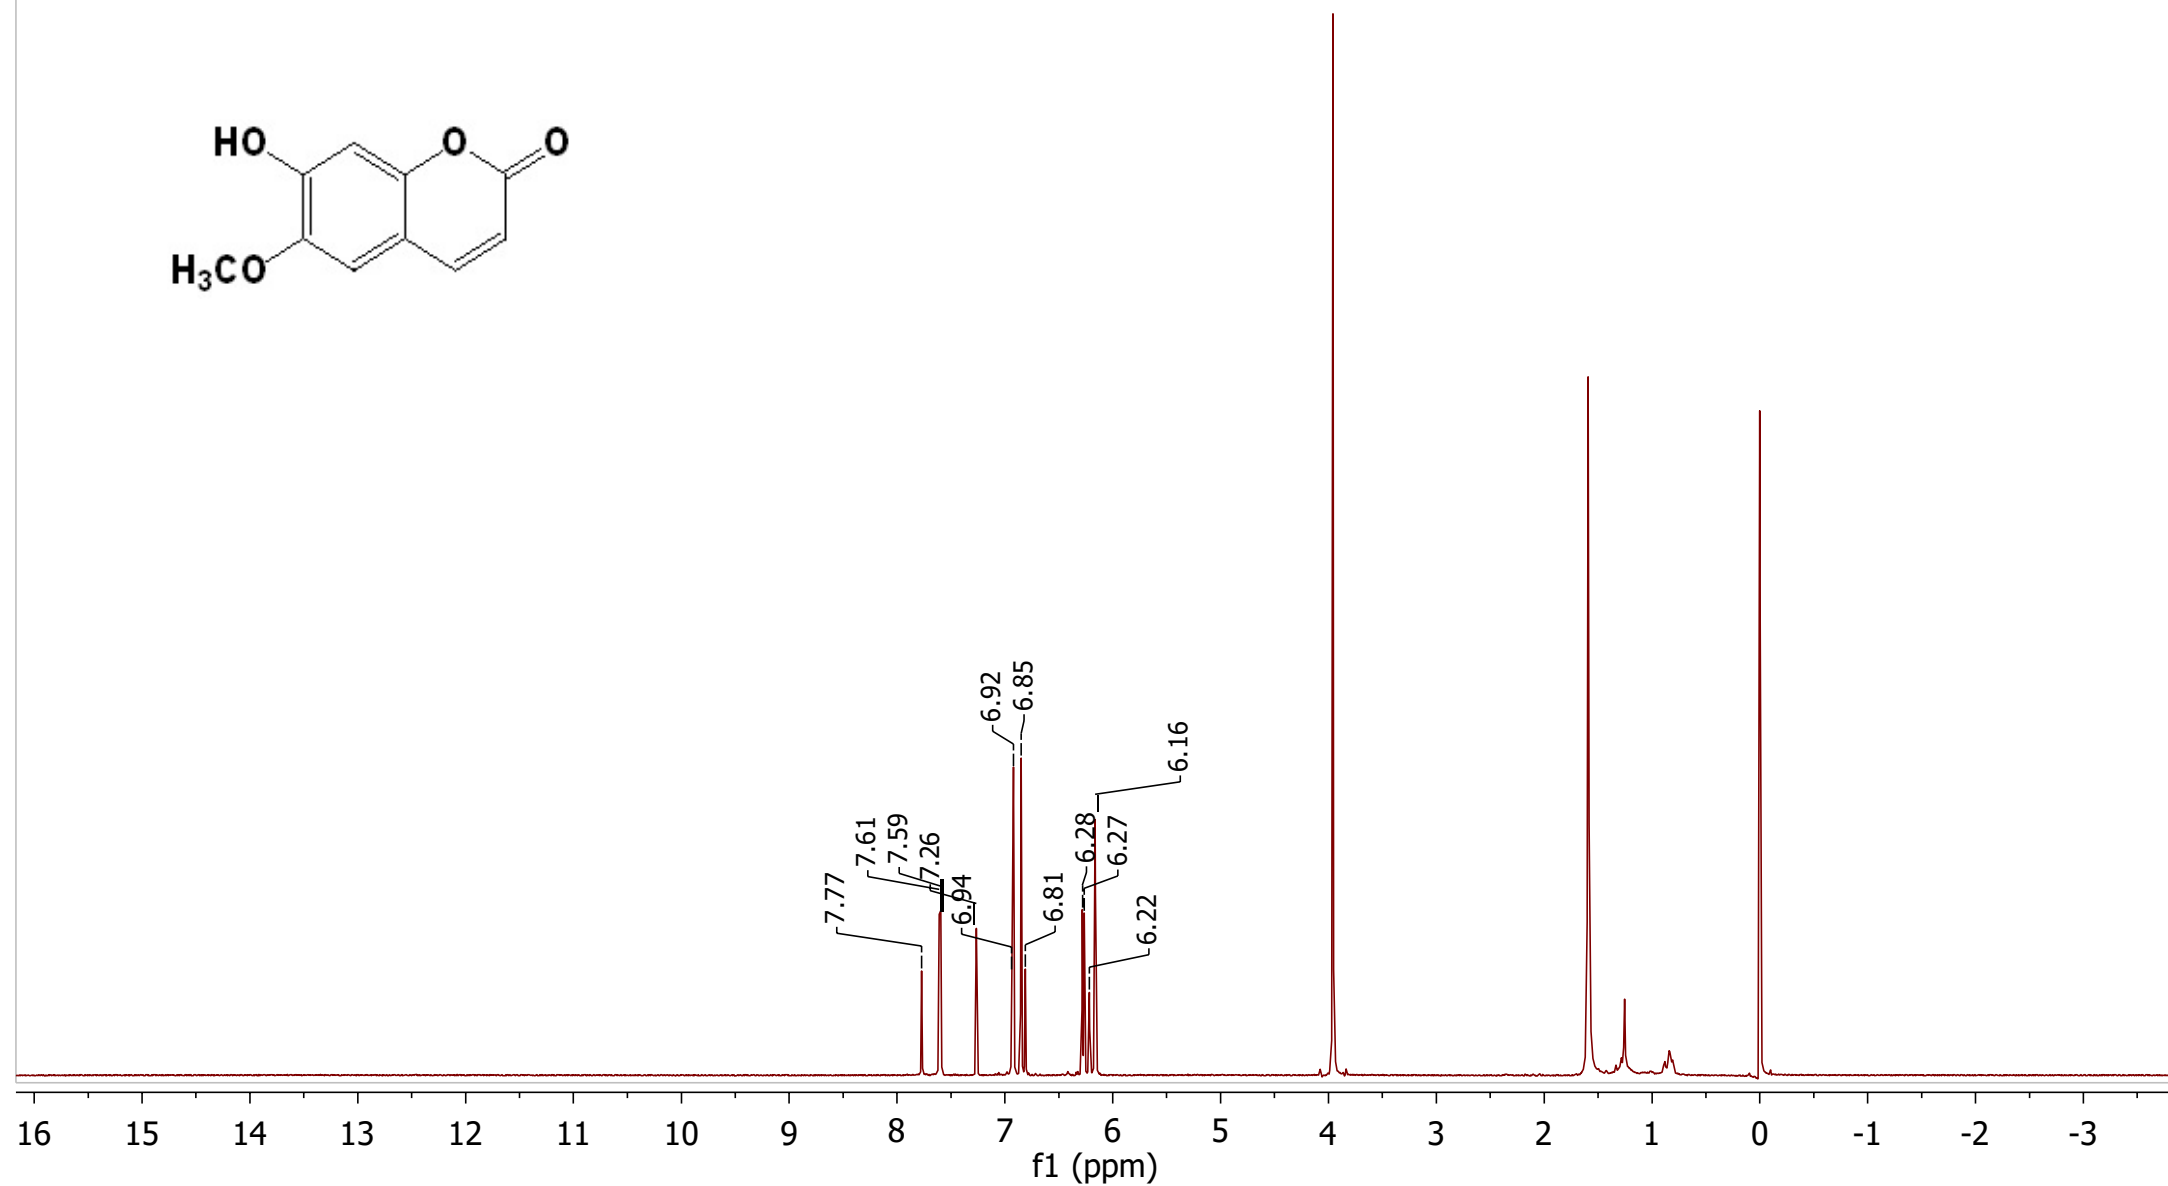

Figure S27. <sup>1</sup>H NMR (CD<sub>3</sub>O, 600 MHz) of scopoletin (**4**)

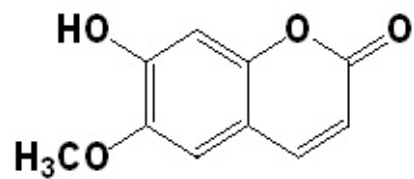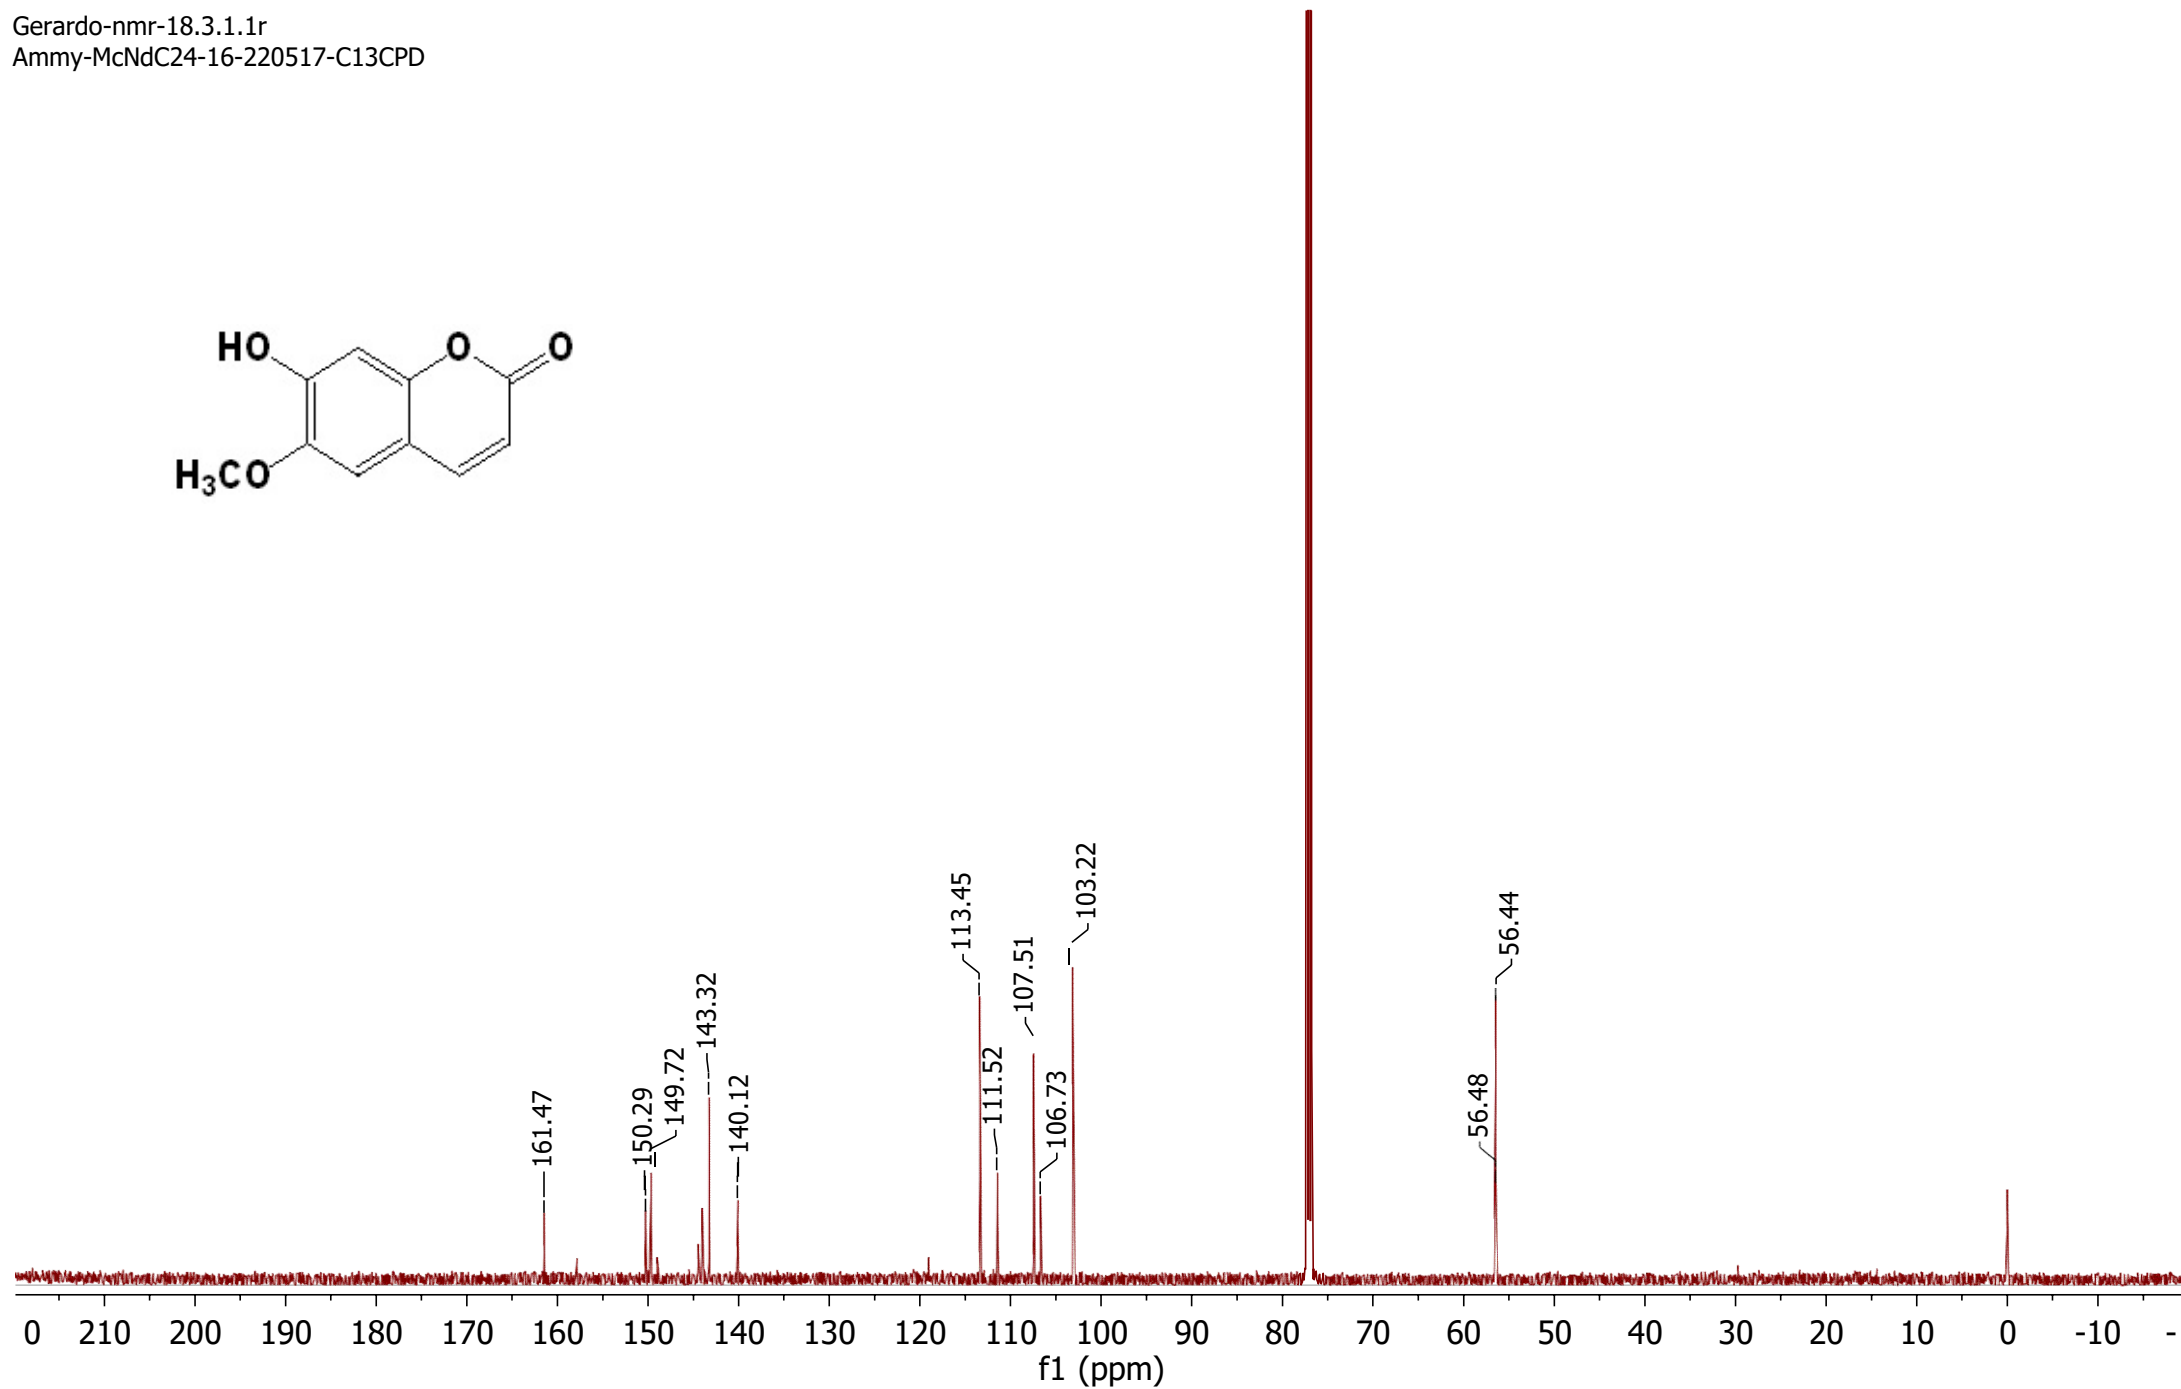

Figura S28. <sup>13</sup>C NMR (CD<sub>3</sub>OD, 150 MHz) of scopoletin (4)

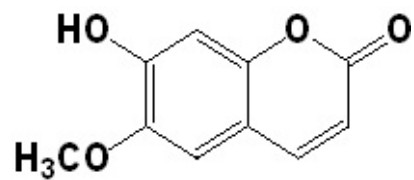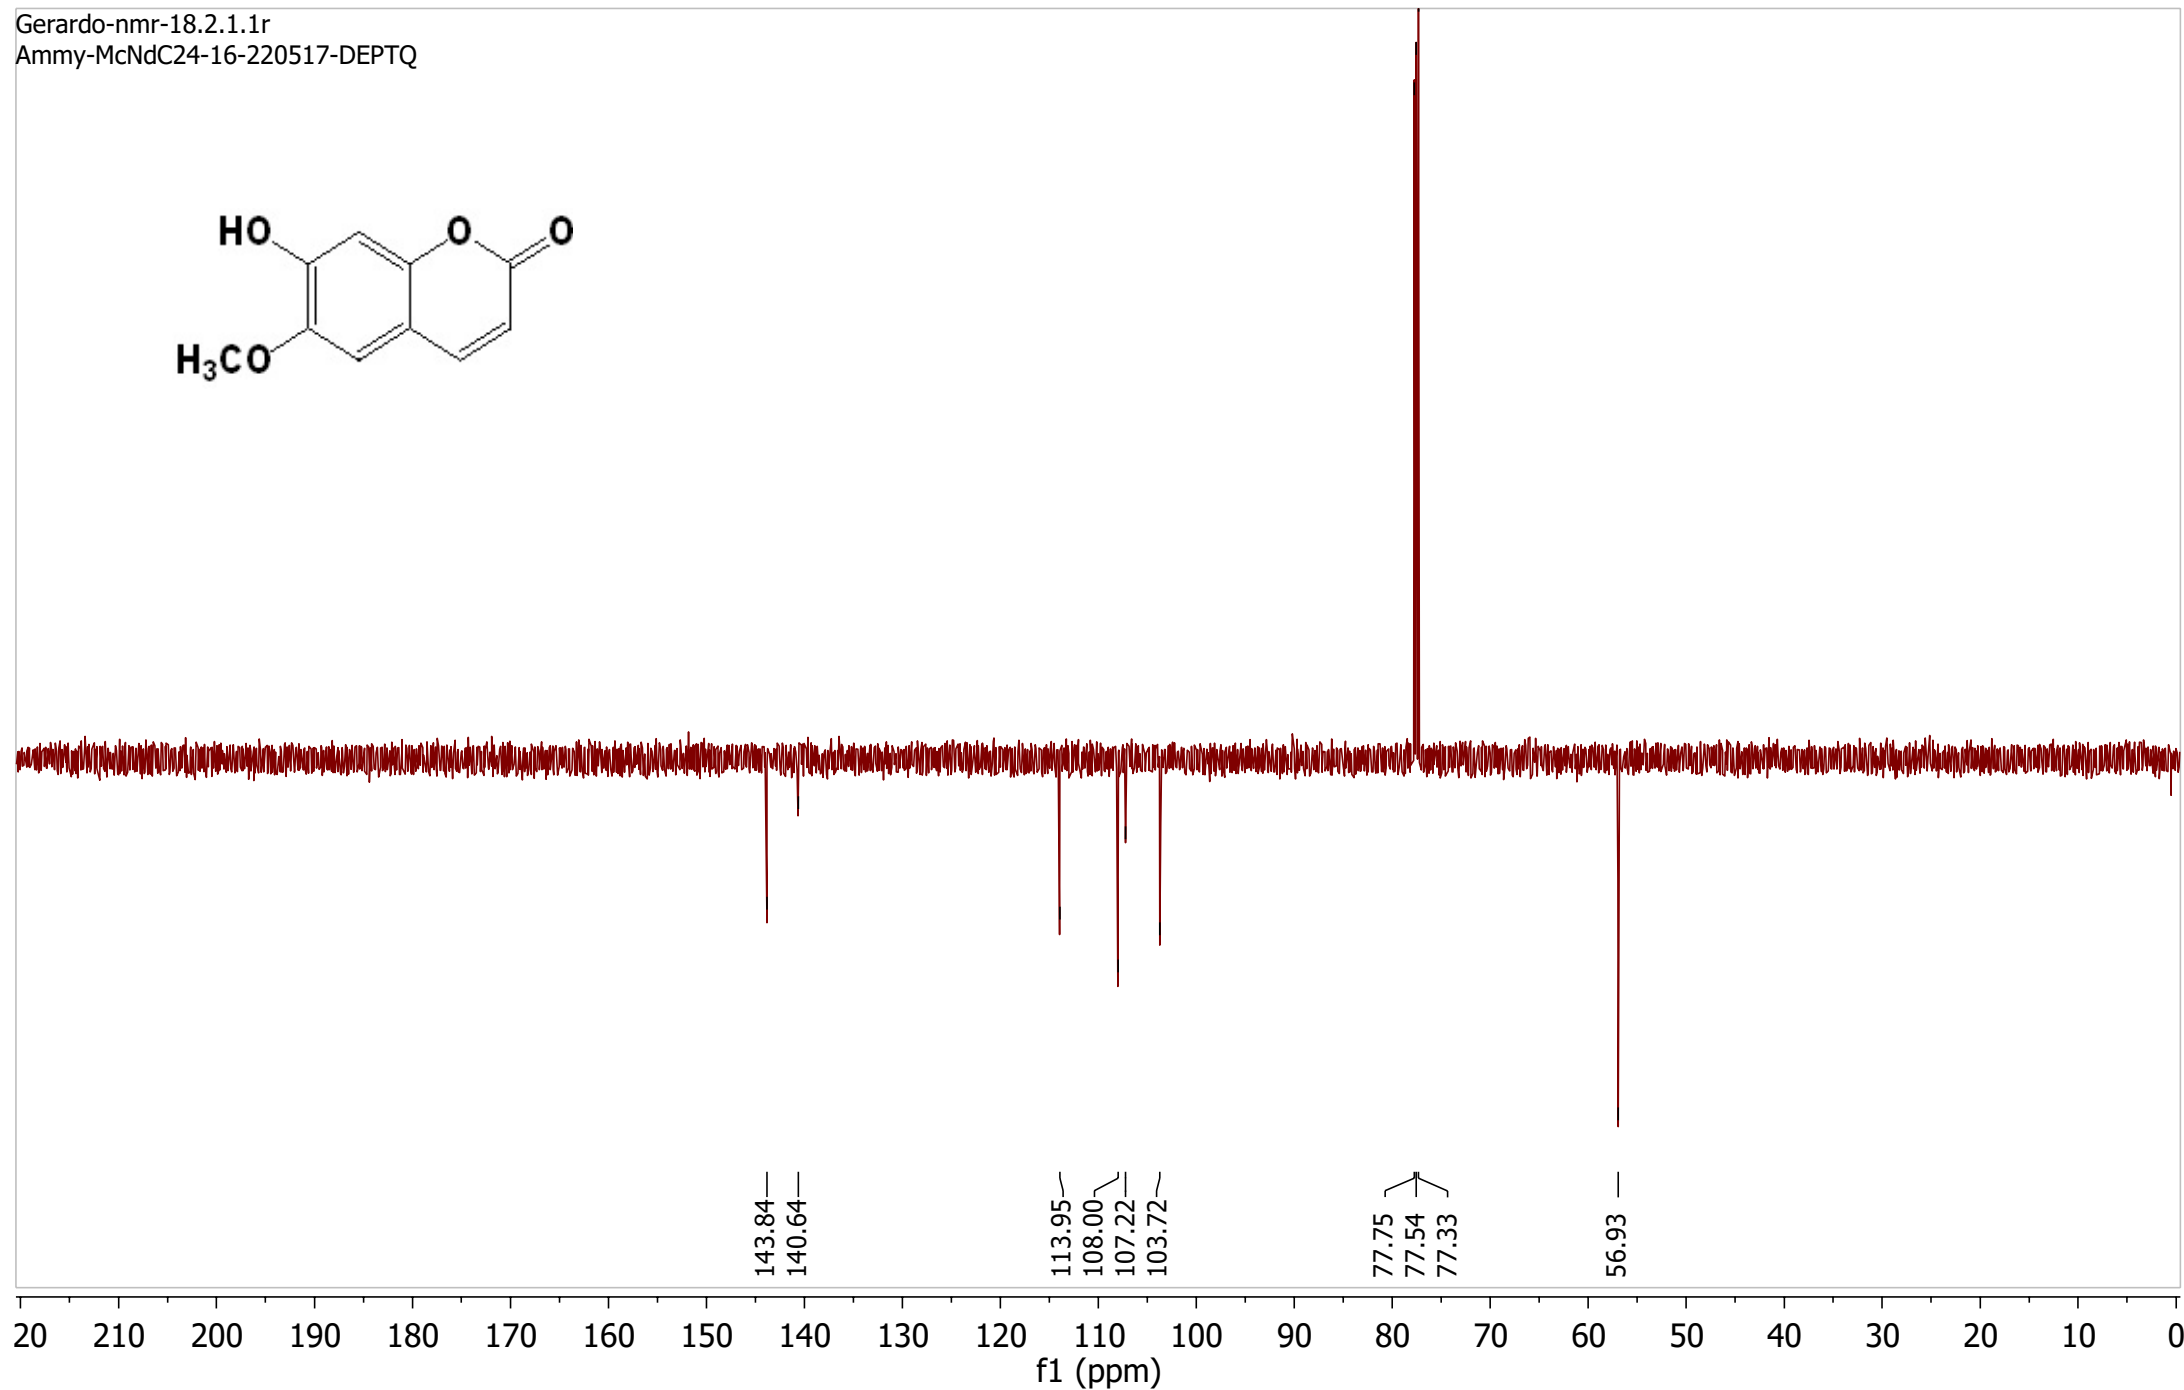

Figure S29. <sup>13</sup>C (DEPT) NMR (CD<sub>3</sub>OD, 150 MHz) of scopoletin (4)

**Table S1:**  $^{13}\text{C}$  NMR ( $\text{CD}_3\text{OD}$ , 100 MHz) of bouvardin (**3**),  $^1\text{H}$ - $^{13}\text{C}$  (HSQC) NMR ( $\text{CD}_3\text{OD}$ , 400 MHz) and  $^{13}\text{C}$  NMR ( $\text{CDCl}_3$ , Bates *et al.*, 1983)

|                 | Experimental                                     |                                                                        | Referencia                                                    |
|-----------------|--------------------------------------------------|------------------------------------------------------------------------|---------------------------------------------------------------|
|                 | $^{13}\text{C}$ NMR of Bouvardin<br>( <b>3</b> ) | $^1\text{H}$ - $^{13}\text{C}$ (HSQC) NMR of<br>Bouvardin ( <b>3</b> ) | $^{13}\text{C}$ NMR Bouvardin<br>(Bates <i>et al.</i> , 1983) |
| Ala-2 $\beta$   | 16.39                                            | 1.29 (d $J=7.03$ )                                                     | 16.4q                                                         |
| Ala-4 $\beta$   | 18.93                                            | 1.08 (d $J=6.64$ )                                                     | 18.5q                                                         |
| Ala-1 $\beta$   | 21.09                                            | 1.22 (d $J=6.64$ )                                                     | 20.5q                                                         |
| Tyr-6 N-Me      | 30.01                                            | 2.67 (s)                                                               | 29.2q                                                         |
| Tyr-5 N-Me      | 33.80                                            | 3.25 (s)                                                               | 33.0q                                                         |
| Tyr-3 $\beta$   | 33.98                                            |                                                                        | 32.7t                                                         |
| Tyr-6 $\beta$   | 36.5                                             | 2.99 (s)                                                               | 35.9t                                                         |
| Tyr-5 $\beta$   | 79.11                                            | 5.03 (s)                                                               | 78.5 d                                                        |
| Tyr-3 N-Me      | 40.38                                            | 2.86 (s)                                                               | 39.7q                                                         |
| Ala- 1 $\alpha$ | 45.96                                            | 4.67 (s)                                                               | 44.9d                                                         |
| Ala-4 $\alpha$  | 46.18                                            |                                                                        | 46.5d                                                         |
| Ala-2 $\alpha$  | 48.1                                             | 4.87 (s)                                                               | 47.9d                                                         |
| Tyr-5 $\alpha$  | 55.74                                            | 5.32 (d $J=1.95$ )                                                     | 53.9d                                                         |
| Tyr-3 O-Me      | 55.81                                            | 3.76 (s)                                                               | 55.3d                                                         |
| Tyr-6 $\alpha$  | 59.11                                            | 4.45 (s)                                                               | 57.8d                                                         |
| Tyr-3 $\alpha$  | 68.74                                            | 3.82 (s)                                                               | 68.75d                                                        |



|                                                |        |                          |        |
|------------------------------------------------|--------|--------------------------|--------|
| <b>Tyr-6<math>\delta</math><sub>a</sub></b>    | 115.13 | 4.65 (s)                 | 113.0d |
| <b>Tyr-3<math>\epsilon</math></b>              | 116.05 | 6.86 (d J=8.60)          | 114.1d |
| <b>Tyr-6 <math>\epsilon</math><sub>a</sub></b> | 117.87 | 6.73 (s)                 | 116.1d |
| <b>Tyr-6<math>\delta</math><sub>b</sub></b>    | 122.89 | 6.53 (d J=1.56)          | 124.2d |
| <b>Tyr-5<math>\epsilon</math><sub>a</sub></b>  | 125.37 | 6.90(dd J=8.60; 10.55)   | 125.7d |
| <b>Tyr-6 <math>\gamma</math></b>               | 126.95 | 7.27(dd J= 8.60; 10.55)  | 127.2s |
| <b>Tyr-3<math>\delta</math></b>                | 131.50 | 7.07(d J= 8.60)          | 130.3d |
| <b>Tyr-3<math>\gamma</math></b>                | 131.71 | 7.48 (dd J= 8.60; 10.55) | 130.7s |
| <b>Tyr-5 <math>\delta</math><sub>a</sub></b>   | 127.17 |                          | 126.9d |
| <b>Tyr-5 <math>\delta</math><sub>b</sub></b>   | 128.78 |                          | 128.5d |
| <b>Tyr-5<math>\gamma</math></b>                | 140.54 |                          | 139.8s |
| <b>Tyr-6<math>\zeta</math></b>                 | 145.28 |                          | 143.2s |
| <b>Tyr-6<math>\epsilon</math><sub>b</sub></b>  | 152.96 |                          | 151.0s |
| <b>Tyr-5<math>\zeta</math></b>                 | 160.06 |                          | 158.9s |
| <b>Tyr-3<math>\zeta</math></b>                 | 161.10 |                          | 158.4s |
| <b>Tyr-6 CO</b>                                | 167.81 |                          | 168.3s |
| <b>Tyr-5 CO</b>                                | 171.25 |                          | 170.0s |
| <b>Tyr-3 CO</b>                                | 171.98 |                          | 170.8s |
| <b>Ala-4 CO</b>                                | 172.10 |                          | 172.2s |
| <b>Ala-1 CO</b>                                | 173.39 |                          | 172.2s |
| <b>Ala-2 CO</b>                                | 174.78 |                          | 172.5s |

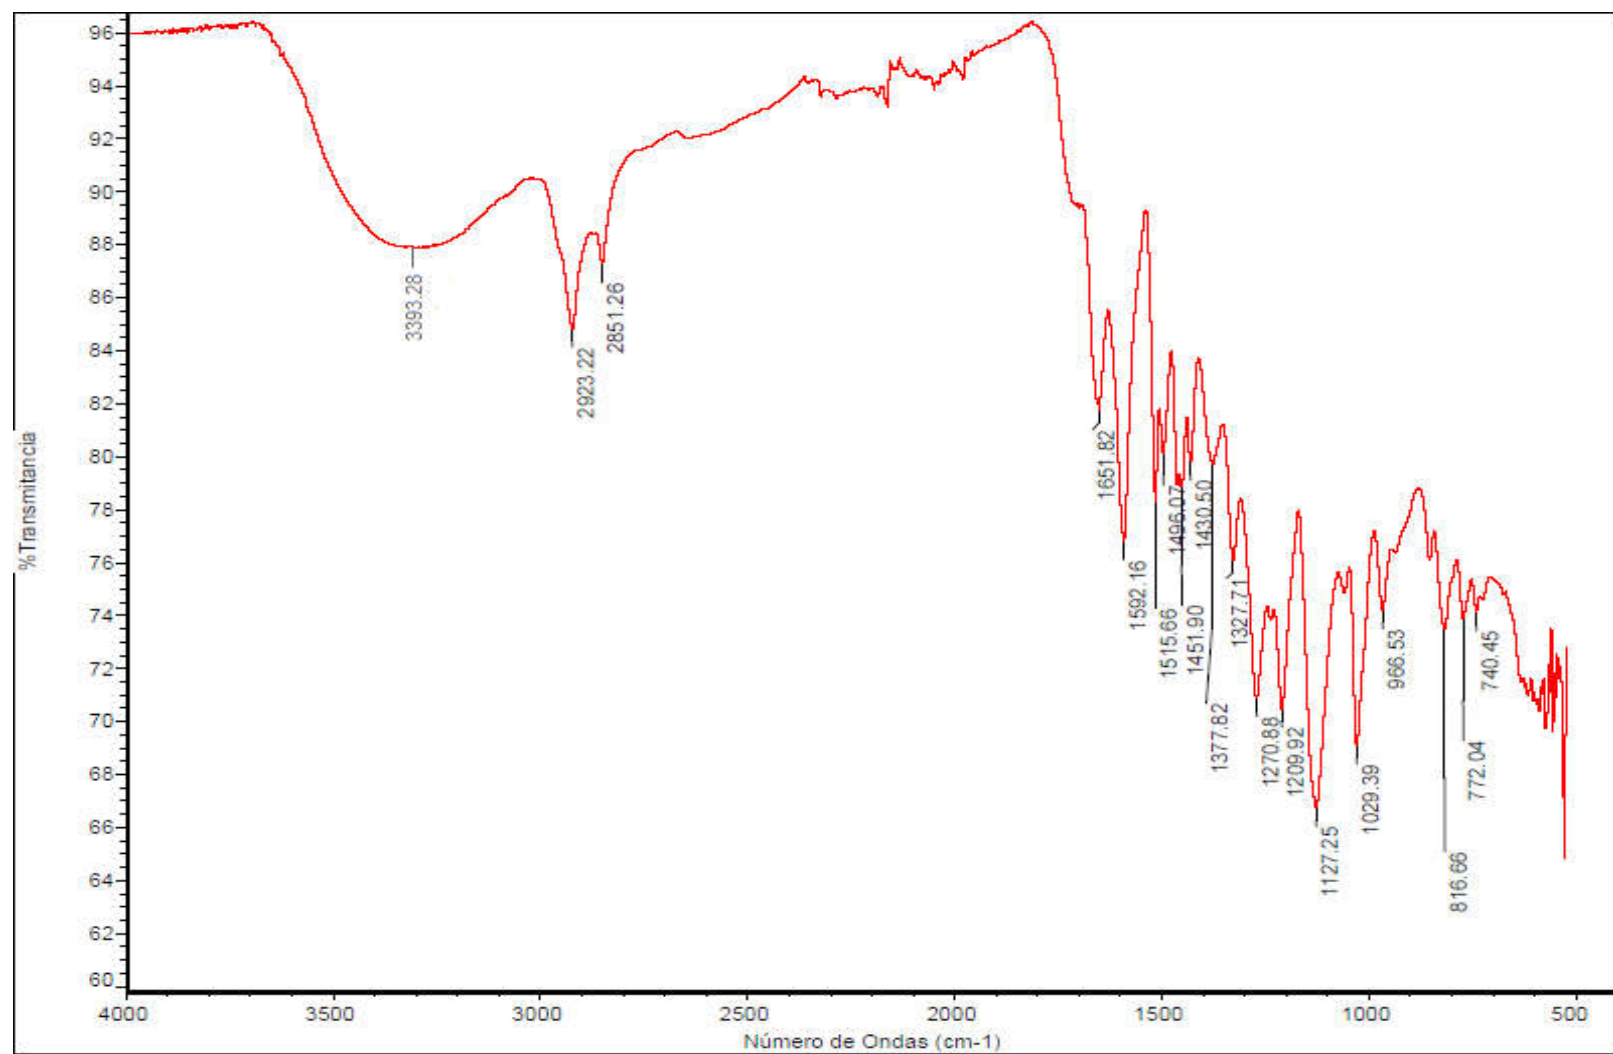

Figure S30. IR spectroscopy ternifoliol (**1**)

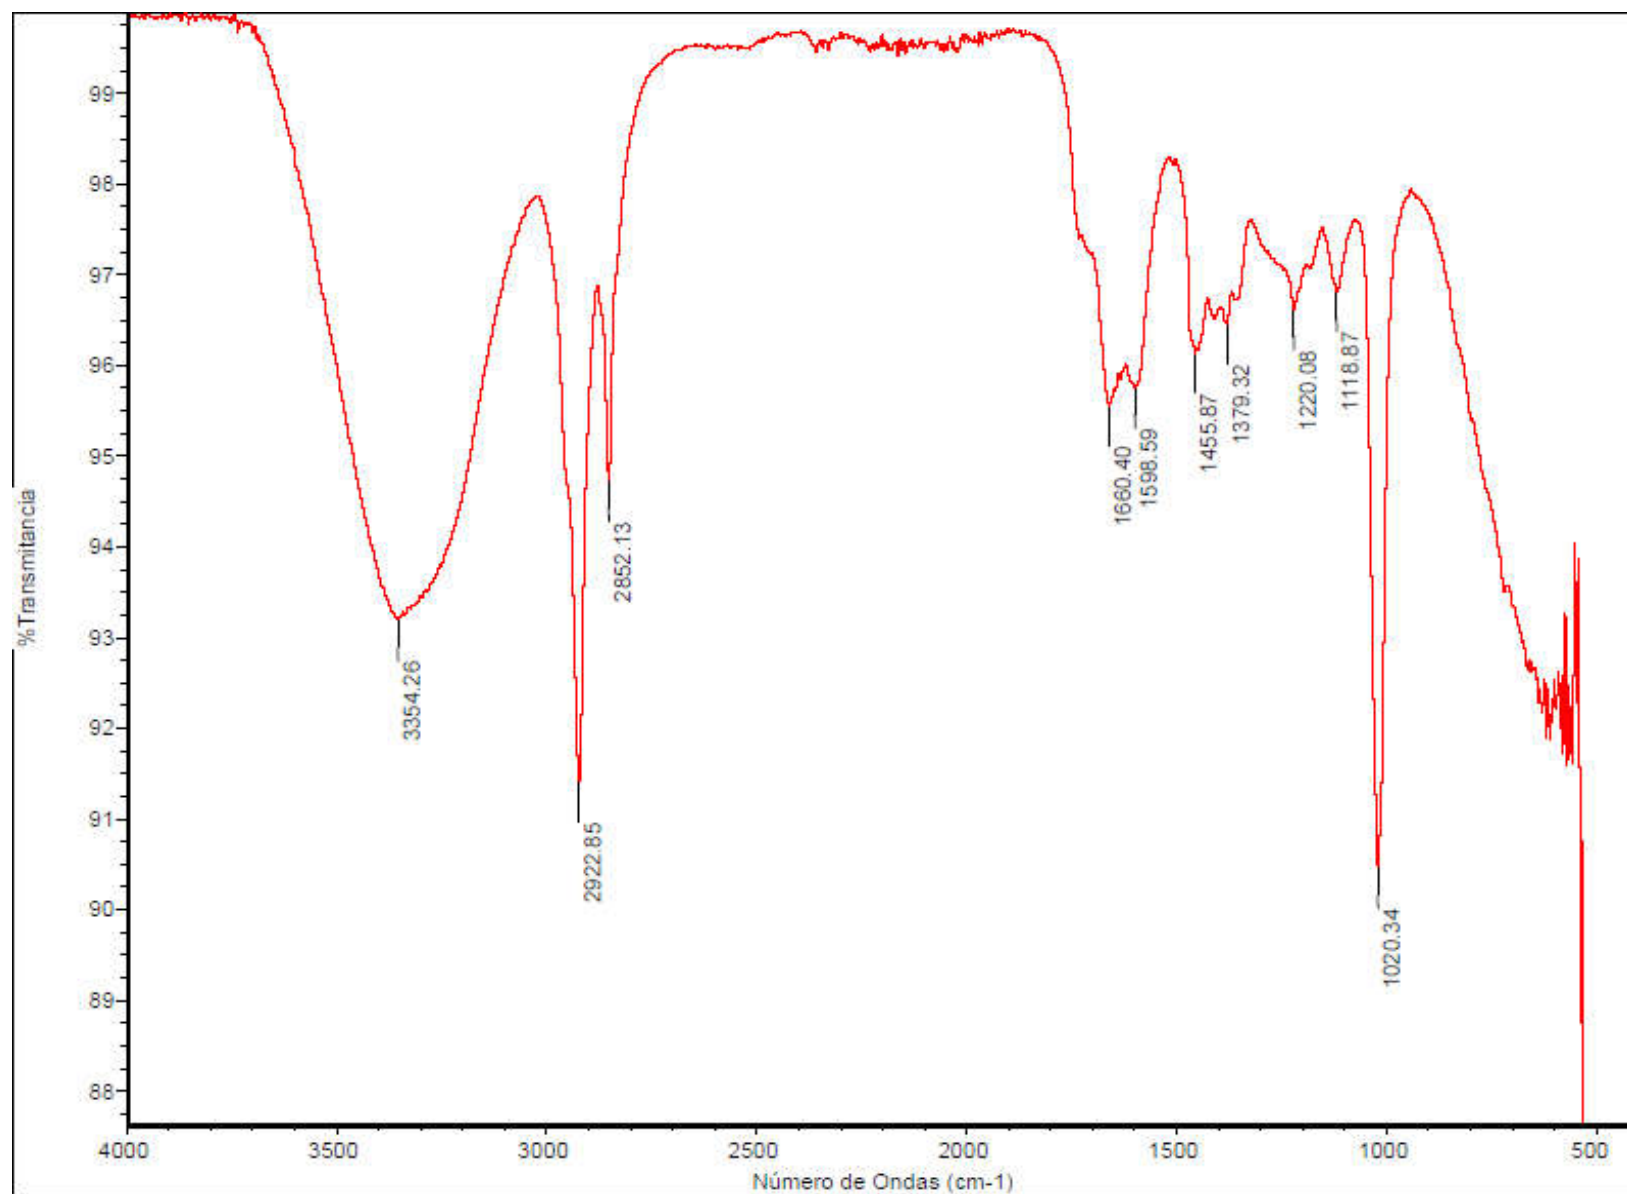

Figure S31. IF spectroscopy ternifolia (2)
